# Supplementary material for: Codon optimization underpins generalist parasitism in fungi
Source: eLife. 2017 Feb 3;6:e22472. doi: 10.7554/eLife.22472 (PMC5315462; doi:10.7554/eLife.22472)
Supplement: Figure 2—source data 2. — DOI: http://dx.doi.org/10.7554/eLife.22472.006 [file elife-22472-fig2-data2.xlsx]

## Sheet: Sheet1
Figure 2 - source data 2. List of core ortholog genes and their codon adaptation indices
Gene id	CEGMA id	Species	median-adjusted scnRCA	median-adjusted CAI	median-adjustedTAI
Altbr_05626.1	KOG0209	Altbr	0.598132	0.730582	0.372964
Altbr_08027.1	KOG0271	Altbr	0.332291	0.591738	0.311836
Altbr_02590.1	KOG0330	Altbr	0.412356	0.627	0.337627
Altbr_09102.1	KOG0418	Altbr	0.48655	0.711849	0.35723
Altbr_04342.1	KOG0434	Altbr	0.523988	0.698626	0.342103
Altbr_02982.1	KOG0468	Altbr	0.440104	0.653446	0.316109
Altbr_09553.1	KOG0477	Altbr	0.519375	0.639121	0.456346
Altbr_01232.1	KOG0481	Altbr	0.435195	0.646835	0.334867
Altbr_04242.1	KOG0523	Altbr	0.764145	0.853998	0.433239
Altbr_02571.1	KOG0524	Altbr	0.68656	0.819838	0.36416
Altbr_08911.1	KOG0556	Altbr	0.492244	0.667772	0.333292
Altbr_06853.1	KOG0602	Altbr	0.472454	0.703033	0.392499
Altbr_07932.1	KOG0659	Altbr	0.400453	0.631408	0.308918
Altbr_01623.1	KOG0679	Altbr	0.404512	0.645733	0.370992
Altbr_09103.1	KOG0727	Altbr	0.441637	0.646835	0.356031
Altbr_08491.1	KOG0741	Altbr	0.457848	0.645733	0.319991
Altbr_08193.1	KOG0880	Altbr	0.57096	0.761436	0.433739
Altbr_00513.1	KOG0922	Altbr	0.301477	0.565292	0.272788
Altbr_03776.1	KOG0948	Altbr	0.452706	0.674383	0.379385
Altbr_01750.1	KOG0952	Altbr	0.408118	0.608267	0.359452
Altbr_00510.1	KOG1036	Altbr	0.427338	0.684301	0.327393
Altbr_08933.1	KOG1078	Altbr	0.542956	0.701931	0.355312
Altbr_02265.1	KOG1145	Altbr	0.407566	0.625898	0.354544
Altbr_05628.1	KOG1148	Altbr	0.474058	0.680995	0.283413
Altbr_00404.1	KOG1159	Altbr	0.654943	0.787882	0.453436
Altbr_01836.1	KOG1180	Altbr	0.583573	0.757028	0.367677
Altbr_00354.1	KOG1342	Altbr	0.47389	0.684301	0.357882
Altbr_05991.1	KOG1350	Altbr	0.798353	0.825348	0.466196
Altbr_02006.1	KOG1358	Altbr	0.415476	0.664466	0.382086
Altbr_04740.1	KOG1390	Altbr	0.458024	0.662262	0.294398
Altbr_01471.1	KOG1393	Altbr	0.610793	0.770251	0.435326
Altbr_08293.1	KOG1463	Altbr	0.483231	0.682097	0.347469
Altbr_04374.1	KOG1487	Altbr	0.503602	0.674383	0.376588
Altbr_07886.1	KOG1541	Altbr	0.382767	0.660058	0.314183
Altbr_04537.1	KOG1643	Altbr	0.721813	0.838571	0.365669
Altbr_09856.1	KOG1885	Altbr	0.626308	0.762538	0.325079
Altbr_04626.1	KOG1889	Altbr	0.419479	0.703033	0.414301
Altbr_00578.1	KOG1979	Altbr	0.36142	0.575209	0.332326
Altbr_04910.1	KOG2509	Altbr	0.363877	0.622592	0.265987
Altbr_08327.1	KOG2519	Altbr	0.483457	0.71846	0.303999
Altbr_08008.1	KOG2535	Altbr	0.369857	0.597248	0.275089
Altbr_07070.1	KOG2775	Altbr	0.383211	0.617083	0.404273
Altbr_09242.1	KOG2971	Altbr	0.41005	0.664466	0.363546
Altbr_00704.1	KOG3022	Altbr	0.305503	0.593942	0.244738
Altbr_03368.1	KOG3974	Altbr	0.525882	0.69532	0.394505
Aspfu_4512	KOG0209	Aspfu	0.577399	0.728771	0.386912
Aspfu_175	KOG0271	Aspfu	0.390496	0.612963	0.328668
Aspfu_592	KOG0330	Aspfu	0.42137	0.615302	0.304524
Aspfu_6503	KOG0418	Aspfu	0.360086	0.594246	0.320578
Aspfu_1238	KOG0434	Aspfu	0.635168	0.758015	0.396249
Aspfu_9449	KOG0468	Aspfu	0.359831	0.57319	0.324509
Aspfu_4533	KOG0477	Aspfu	0.534522	0.705375	0.391227
Aspfu_6152	KOG0481	Aspfu	0.481365	0.669112	0.370725
Aspfu_1217	KOG0523	Aspfu	0.956909	0.973254	0.471231
Aspfu_3671	KOG0524	Aspfu	0.643089	0.738129	0.401081
Aspfu_1891	KOG0556	Aspfu	0.683077	0.801297	0.442211
Aspfu_5780	KOG0602	Aspfu	0.409448	0.652735	0.346173
Aspfu_8775	KOG0659	Aspfu	0.34085	0.570851	0.297177
Aspfu_2233	KOG0679	Aspfu	0.395904	0.62934	0.345794
Aspfu_4278	KOG0727	Aspfu	0.512234	0.665603	0.368823
Aspfu_4388	KOG0741	Aspfu	0.488555	0.674961	0.376304
Aspfu_5223	KOG0880	Aspfu	0.687904	0.775562	0.423986
Aspfu_791	KOG0922	Aspfu	0.367929	0.549795	0.299844
Aspfu_5173	KOG0948	Aspfu	0.436557	0.635188	0.34841
Aspfu_4860	KOG0952	Aspfu	0.42288	0.643377	0.342259
Aspfu_8133	KOG1036	Aspfu	0.379278	0.614132	0.343892
Aspfu_1888	KOG1078	Aspfu	0.513209	0.684319	0.376537
Aspfu_622	KOG1145	Aspfu	0.413638	0.634019	0.35803
Aspfu_1822	KOG1148	Aspfu	0.585786	0.770882	0.421283
Aspfu_6527	KOG1159	Aspfu	0.309579	0.580209	0.327143
Aspfu_2489	KOG1180	Aspfu	0.59793	0.763864	0.413985
Aspfu_1969	KOG1342	Aspfu	0.45011	0.652735	0.379554
Aspfu_6837	KOG1350	Aspfu	0.996562	0.963896	0.504577
Aspfu_8300	KOG1358	Aspfu	0.432792	0.616472	0.332822
Aspfu_9450	KOG1390	Aspfu	0.448925	0.623491	0.383321
Aspfu_4207	KOG1393	Aspfu	0.765573	0.83405	0.442879
Aspfu_600	KOG1463	Aspfu	0.430758	0.644547	0.344848
Aspfu_523	KOG1487	Aspfu	0.488648	0.657414	0.339506
Aspfu_7714	KOG1541	Aspfu	0.381972	0.598925	0.349878
Aspfu_7118	KOG1643	Aspfu	0.889539	0.931142	0.451713
Aspfu_7839	KOG1885	Aspfu	0.843651	0.900728	0.461042
Aspfu_5262	KOG1889	Aspfu	0.43374	0.648056	0.355023
Aspfu_6947	KOG1979	Aspfu	0.352041	0.580209	0.313359
Aspfu_4401	KOG2509	Aspfu	0.45614	0.700696	0.349309
Aspfu_3755	KOG2519	Aspfu	0.386842	0.611793	0.344097
Aspfu_6414	KOG2535	Aspfu	0.363754	0.611793	0.348646
Aspfu_5150	KOG2775	Aspfu	0.514268	0.696017	0.385929
Aspfu_197	KOG2971	Aspfu	0.550683	0.697187	0.394533
Aspfu_3076	KOG3022	Aspfu	0.396981	0.616472	0.339601
Aspfu_2507	KOG3974	Aspfu	0.373731	0.584888	0.306565
B0510_3113T1	KOG0209	Botci	0.552176	0.676236	0.35699
B0510_1178T1	KOG0271	Botci	0.385958	0.622981	0.319914
B0510_7925T1	KOG0330	Botci	0.477797	0.643077	0.351222
B0510_4840T1	KOG0418	Botci	0.530018	0.682264	0.359844
B0510_9576T1	KOG0434	Botci	0.646089	0.705375	0.374154
B0510_8952T1	KOG0468	Botci	0.444899	0.646091	0.341497
B0510_5850T1	KOG0477	Botci	0.603763	0.696332	0.366231
B0510_2612T1	KOG0481	Botci	0.495539	0.660159	0.345433
B0510_371T1	KOG0523	Botci	0.347971	0.623986	0.326085
B0510_10309T1	KOG0524	Botci	0.308107	0.596856	0.309593
B0510_5665T1	KOG0556	Botci	0.61174	0.707385	0.377217
B0510_6798T1	KOG0602	Botci	0.475968	0.655135	0.342977
B0510_1584T1	KOG0659	Botci	0.381837	0.630014	0.330389
B0510_1638T1	KOG0679	Botci	0.399476	0.635038	0.327514
B0510_6619T1	KOG0727	Botci	0.587905	0.682264	0.365046
B0510_1786T1	KOG0741	Botci	0.438146	0.647096	0.348305
B0510_7173T1	KOG0880	Botci	0.806131	0.737529	0.391741
B0510_5858T1	KOG0922	Botci	0.403464	0.610923	0.328337
B0510_2334T1	KOG0948	Botci	0.573443	0.684274	0.365885
B0510_7569T1	KOG0952	Botci	0.486923	0.656139	0.343587
B0510_2819T1	KOG1036	Botci	0.41451	0.636043	0.325086
B0510_5603T1	KOG1078	Botci	0.619753	0.697337	0.369771
B0510_6575T1	KOG1145	Botci	0.457053	0.650111	0.347739
B0510_8371T1	KOG1148	Botci	0.548741	0.676236	0.356999
B0510_2904T1	KOG1159	Botci	0.723173	0.725471	0.379214
B0510_10023T1	KOG1180	Botci	0.409133	0.622981	0.322037
B0510_1504T1	KOG1342	Botci	0.559783	0.68126	0.356901
B0510_2537T1	KOG1350	Botci	0.746825	0.730495	0.375117
B0510_10259T1	KOG1358	Botci	0.485003	0.662168	0.347453
B0510_4333T1	KOG1390	Botci	0.470867	0.636043	0.337544
B0510_9726T1	KOG1393	Botci	0.933156	0.776716	0.400195
B0510_1527T1	KOG1463	Botci	0.523583	0.663173	0.342322
B0510_4690T1	KOG1487	Botci	0.538929	0.674226	0.348676
B0510_959T1	KOG1541	Botci	0.494638	0.691308	0.350497
B0510_8205T1	KOG1643	Botci	1.25097	0.850067	0.436636
B0510_8569T1	KOG1885	Botci	0.854025	0.776716	0.40648
B0510_7676T1	KOG1889	Botci	0.418205	0.627	0.333858
B0510_2909T1	KOG1979	Botci	0.421748	0.635038	0.335436
B0510_7199T1	KOG2509	Botci	0.379727	0.632024	0.314174
B0510_3344T1	KOG2519	Botci	0.575659	0.680255	0.366677
B0510_5808T1	KOG2535	Botci	0.53518	0.683269	0.348785
B0510_2105T1	KOG2775	Botci	0.586086	0.705375	0.374193
B0510_9412T1	KOG2971	Botci	0.482752	0.658149	0.345604
B0510_2875T1	KOG3022	Botci	0.333539	0.610923	0.315774
B0510_3461T1	KOG3974	Botci	0.201811	0.557668	0.314221
BDET_07139	KOG0209	Batde	0.454726	0.662625	0.352693
BDET_08214	KOG0271	Batde	0.367437	0.614786	0.325048
BDET_02302	KOG0330	Batde	0.440313	0.645321	0.342438
BDET_06676	KOG0418	Batde	0.339401	0.617839	0.345842
BDET_00228	KOG0434	Batde	0.527975	0.703339	0.367749
BDET_01141	KOG0468	Batde	0.472213	0.671786	0.356945
BDET_04395	KOG0477	Batde	0.483461	0.69825	0.379966
BDET_07786	KOG0481	Batde	0.451127	0.674839	0.36429
BDET_04580	KOG0523	Batde	0.596745	0.753214	0.382409
BDET_05949	KOG0524	Batde	0.505686	0.69825	0.370642
BDET_03133	KOG0556	Batde	0.586072	0.741	0.383055
BDET_03685	KOG0602	Batde	0.388339	0.627	0.336808
BDET_07330	KOG0659	Batde	0.371623	0.601554	0.329612
BDET_05767	KOG0679	Batde	0.402313	0.629036	0.336607
BDET_05811	KOG0727	Batde	0.570613	0.737946	0.392707
BDET_07996	KOG0741	Batde	0.456792	0.680946	0.362432
BDET_04012	KOG0880	Batde	0.435571	0.631071	0.348944
BDET_02270	KOG0922	Batde	0.358269	0.603589	0.320615
BDET_06864	KOG0948	Batde	0.396688	0.632089	0.354119
BDET_04947	KOG0952	Batde	0.436796	0.656518	0.348282
BDET_00071	KOG1036	Batde	0.395037	0.611732	0.329642
BDET_06846	KOG1078	Batde	0.45557	0.658554	0.356048
BDET_00703	KOG1145	Batde	0.406491	0.607661	0.345306
BDET_04352	KOG1148	Batde	0.490198	0.674839	0.362736
BDET_03161	KOG1159	Batde	0.362898	0.604607	0.324359
BDET_00503	KOG1180	Batde	0.516533	0.707411	0.366353
BDET_05157	KOG1342	Batde	0.457703	0.688071	0.35811
BDET_05630	KOG1350	Batde	0.74443	0.814286	0.412523
BDET_03569	KOG1358	Batde	0.484929	0.685018	0.35965
BDET_03560	KOG1390	Batde	0.583202	0.736929	0.385566
BDET_01894	KOG1393	Batde	0.535808	0.717589	0.372044
BDET_04751	KOG1463	Batde	0.535733	0.678911	0.367402
BDET_04825	KOG1487	Batde	0.542336	0.703339	0.377188
BDET_04344	KOG1541	Batde	0.406762	0.642268	0.348717
BDET_05736	KOG1643	Batde	0.604704	0.746089	0.386329
BDET_05645	KOG1885	Batde	0.350832	0.609696	0.329534
BDET_04481	KOG1889	Batde	0.370074	0.614786	0.326128
BDET_04390	KOG1979	Batde	0.362373	0.599518	0.320028
BDET_02984	KOG2509	Batde	0.394949	0.624964	0.326076
BDET_00981	KOG2519	Batde	0.484391	0.665679	0.356839
BDET_05813	KOG2535	Batde	0.442834	0.654482	0.335006
BDET_05265	KOG2775	Batde	0.491211	0.686036	0.365538
BDET_02758	KOG2971	Batde	0.438448	0.674839	0.353609
BDET_05500	KOG3022	Batde	0.383549	0.625982	0.329931
BDET_04175	KOG3974	Batde	0.347903	0.605625	0.334835
Beaba_5397	KOG0209	Beaba	0.665752	0.708048	0.395349
Beaba_2993	KOG0271	Beaba	0.290381	0.520061	0.255777
Beaba_7393	KOG0330	Beaba	0.583731	0.749698	0.412839
Beaba_7096	KOG0418	Beaba	0.655414	0.778966	0.427626
Beaba_10337	KOG0434	Beaba	0.439236	0.561711	0.325301
Beaba_5315	KOG0468	Beaba	0.433076	0.656268	0.34417
Beaba_4494	KOG0477	Beaba	0.423622	0.610115	0.323634
Beaba_2527	KOG0481	Beaba	0.564541	0.63488	0.367294
Beaba_3225	KOG0523	Beaba	0.875801	0.82737	0.45836
Beaba_3483	KOG0524	Beaba	0.833749	0.821741	0.44753
Beaba_6719	KOG0556	Beaba	0.530753	0.758704	0.412165
Beaba_1127	KOG0602	Beaba	0.509342	0.61912	0.348834
Beaba_7187	KOG0659	Beaba	0.530724	0.799228	0.366228
Beaba_4860	KOG0679	Beaba	0.977444	0.855512	0.48335
Beaba_4897	KOG0727	Beaba	0.529902	0.746321	0.394455
Beaba_3597	KOG0741	Beaba	0.447809	0.628126	0.361556
Beaba_7199	KOG0880	Beaba	0.888625	0.915172	0.509056
Beaba_7492	KOG0922	Beaba	0.330417	0.596607	0.312809
Beaba_2496	KOG0948	Beaba	0.52517	0.682158	0.3646
Beaba_497	KOG0952	Beaba	0.448764	0.60111	0.339344
Beaba_2981	KOG1036	Beaba	0.440129	0.7103	0.342669
Beaba_2410	KOG1078	Beaba	0.530932	0.703546	0.36596
Beaba_1274	KOG1145	Beaba	0.388224	0.607864	0.31294
Beaba_6279	KOG1148	Beaba	0.589562	0.69454	0.376293
Beaba_1729	KOG1159	Beaba	0.395578	0.690038	0.33997
Beaba_3894	KOG1180	Beaba	0.855078	0.840878	0.459305
Beaba_1647	KOG1342	Beaba	0.534079	0.610115	0.388092
Beaba_8092	KOG1350	Beaba	0.877517	0.753075	0.474943
Beaba_10206	KOG1358	Beaba	0.370718	0.539197	0.321086
Beaba_5314	KOG1390	Beaba	0.784319	0.923052	0.45092
Beaba_3428	KOG1393	Beaba	0.832858	0.82737	0.455806
Beaba_2903	KOG1463	Beaba	0.575756	0.697917	0.402435
Beaba_5925	KOG1487	Beaba	0.555107	0.650639	0.378457
Beaba_3036	KOG1541	Beaba	0.457145	0.760955	0.406176
Beaba_5998	KOG1643	Beaba	0.838767	0.932057	0.43799
Beaba_3037	KOG1885	Beaba	0.817357	0.842004	0.462491
Beaba_1747	KOG1889	Beaba	0.622604	0.723808	0.378212
Beaba_1777	KOG1979	Beaba	0.376664	0.61912	0.359827
Beaba_5914	KOG2509	Beaba	0.279415	0.696792	0.334137
Beaba_4884	KOG2519	Beaba	0.467708	0.759829	0.405565
Beaba_7100	KOG2535	Beaba	0.644382	0.820616	0.41453
Beaba_3592	KOG2775	Beaba	0.432859	0.706923	0.366889
Beaba_4539	KOG2971	Beaba	0.431018	0.614618	0.340524
Beaba_7862	KOG3022	Beaba	0.376728	0.735065	0.377388
Beaba_153	KOG3974	Beaba	0.333173	0.545952	0.293555
Blugr23948	KOG0209	Blugr	0.40249	0.640176	0.335556
Blugr24973	KOG0271	Blugr	0.40042	0.635525	0.321061
Blugr24051	KOG0330	Blugr	0.386705	0.6239	0.336427
Blugr24017	KOG0418	Blugr	0.381962	0.62235	0.350022
Blugr25976	KOG0434	Blugr	0.404823	0.644826	0.333085
Blugr22448	KOG0468	Blugr	0.404476	0.6301	0.3372
Blugr21266	KOG0477	Blugr	0.412953	0.6363	0.354533
Blugr24823	KOG0481	Blugr	0.408215	0.6363	0.347777
Blugr21419	KOG0523	Blugr	0.421926	0.645601	0.341241
Blugr23186	KOG0524	Blugr	0.413996	0.63475	0.360057
Blugr23761	KOG0556	Blugr	0.401674	0.637075	0.353532
Blugr21822	KOG0602	Blugr	0.405019	0.647151	0.34256
Blugr24178	KOG0659	Blugr	0.39617	0.63165	0.327204
Blugr23558	KOG0679	Blugr	0.375452	0.608399	0.335863
Blugr24572	KOG0727	Blugr	0.396024	0.616925	0.349608
Blugr24117	KOG0741	Blugr	0.406592	0.640951	0.338143
Blugr24526	KOG0880	Blugr	0.41319	0.644051	0.350476
Blugr21351	KOG0922	Blugr	0.398639	0.6332	0.341005
Blugr21802	KOG0948	Blugr	0.418111	0.650251	0.346668
Blugr22271	KOG0952	Blugr	0.397863	0.641726	0.333042
Blugr25123	KOG1036	Blugr	0.390866	0.615375	0.345469
Blugr23758	KOG1078	Blugr	0.412582	0.652576	0.351297
Blugr25930	KOG1145	Blugr	0.389746	0.635525	0.334864
Blugr25201	KOG1148	Blugr	0.409082	0.646376	0.341931
Blugr20536	KOG1159	Blugr	0.387365	0.620025	0.325141
Blugr21892	KOG1180	Blugr	0.398626	0.629325	0.341363
Blugr23351	KOG1342	Blugr	0.387131	0.6301	0.357396
Blugr23424	KOG1350	Blugr	0.459522	0.655676	0.362773
Blugr20279	KOG1358	Blugr	0.406332	0.63785	0.332792
Blugr22447	KOG1390	Blugr	0.400798	0.62855	0.365921
Blugr23946	KOG1393	Blugr	0.402154	0.63785	0.360162
Blugr24133	KOG1463	Blugr	0.405382	0.615375	0.352559
Blugr23468	KOG1487	Blugr	0.429583	0.652576	0.347306
Blugr24920	KOG1541	Blugr	0.406628	0.6301	0.330485
Blugr20490	KOG1643	Blugr	0.397692	0.607624	0.34239
Blugr24700	KOG1885	Blugr	0.413797	0.6363	0.351946
Blugr25157	KOG1889	Blugr	0.393172	0.630875	0.336664
Blugr23958	KOG1979	Blugr	0.405828	0.640176	0.339172
Blugr24110	KOG2509	Blugr	0.376731	0.620025	0.32718
Blugr25246	KOG2519	Blugr	0.39612	0.6332	0.347496
Blugr20808	KOG2535	Blugr	0.377679	0.630875	0.348536
Blugr26160	KOG2775	Blugr	0.382724	0.6177	0.345084
Blugr23414	KOG2971	Blugr	0.382537	0.621575	0.342726
Blugr25170	KOG3022	Blugr	0.359947	0.598324	0.323957
Blugr21594	KOG3974	Blugr	0.357787	0.595224	0.340252
Clafu188577	KOG0209	Clafu	0.491696	0.66982	0.350079
Clafu188987	KOG0271	Clafu	0.311935	0.578063	0.256474
Clafu191928	KOG0330	Clafu	0.366195	0.622922	0.334074
Clafu187073	KOG0418	Clafu	0.392397	0.654527	0.287255
Clafu188546	KOG0434	Clafu	0.486534	0.645351	0.335759
Clafu194488	KOG0468	Clafu	0.438445	0.655546	0.315346
Clafu188953	KOG0477	Clafu	0.532739	0.662683	0.296567
Clafu193629	KOG0481	Clafu	0.491415	0.651468	0.291998
Clafu184676	KOG0523	Clafu	0.78503	0.802356	0.336819
Clafu189204	KOG0524	Clafu	0.611971	0.7106	0.319006
Clafu194298	KOG0556	Clafu	0.551212	0.736088	0.289031
Clafu190523	KOG0602	Clafu	0.455766	0.663702	0.311882
Clafu188258	KOG0659	Clafu	0.470357	0.718756	0.370439
Clafu191459	KOG0679	Clafu	0.366678	0.629039	0.285026
Clafu195825	KOG0727	Clafu	0.58025	0.70958	0.298621
Clafu186898	KOG0741	Clafu	0.410606	0.598454	0.335654
Clafu186122	KOG0880	Clafu	0.574115	0.726912	0.354899
Clafu187385	KOG0922	Clafu	0.383792	0.611707	0.289832
Clafu189935	KOG0948	Clafu	0.440601	0.636176	0.348584
Clafu184776	KOG0952	Clafu	0.480112	0.656566	0.348171
Clafu188143	KOG1036	Clafu	0.504037	0.771771	0.348474
Clafu193212	KOG1078	Clafu	0.535398	0.666761	0.330026
Clafu187685	KOG1145	Clafu	0.412885	0.617824	0.305133
Clafu185007	KOG1148	Clafu	0.384929	0.640254	0.30686
Clafu185536	KOG1159	Clafu	0.357951	0.587239	0.31319
Clafu192623	KOG1180	Clafu	0.516152	0.685112	0.347864
Clafu187554	KOG1342	Clafu	0.457815	0.682054	0.322103
Clafu184793	KOG1350	Clafu	0.764113	0.748322	0.375413
Clafu195786	KOG1358	Clafu	0.428772	0.642293	0.268672
Clafu194487	KOG1390	Clafu	0.676189	0.749341	0.314618
Clafu190480	KOG1393	Clafu	0.652454	0.745263	0.28219
Clafu194972	KOG1463	Clafu	0.570802	0.699385	0.264973
Clafu190003	KOG1487	Clafu	0.477284	0.69021	0.35491
Clafu191605	KOG1541	Clafu	0.258177	0.562771	0.434247
Clafu193348	KOG1643	Clafu	0.534908	0.712639	0.437174
Clafu192436	KOG1885	Clafu	0.645684	0.735068	0.315227
Clafu185314	KOG1889	Clafu	0.428702	0.645351	0.298984
Clafu190102	KOG1979	Clafu	0.437006	0.635156	0.323383
Clafu184110	KOG2509	Clafu	0.380903	0.623941	0.288718
Clafu188948	KOG2519	Clafu	0.44971	0.678995	0.350079
Clafu190900	KOG2535	Clafu	0.44429	0.655546	0.326205
Clafu188237	KOG2775	Clafu	0.444067	0.661663	0.243463
Clafu183823	KOG2971	Clafu	0.345875	0.618844	0.335371
Clafu189892	KOG3022	Clafu	0.393619	0.619863	0.306574
Clafu191292	KOG3974	Clafu	0.515399	0.683073	0.28294
Colhi_03835	KOG0209	Colhi	0.674045	0.781478	0.399305
Colhi_08418	KOG0271	Colhi	0.445962	0.841193	0.349028
Colhi_01174	KOG0330	Colhi	0.441406	0.582863	0.326926
Colhi_09007	KOG0418	Colhi	0.672878	0.760708	0.393479
Colhi_05540	KOG0434	Colhi	0.554408	0.678925	0.364221
Colhi_02528	KOG0468	Colhi	0.425072	0.568584	0.326012
Colhi_03485	KOG0477	Colhi	0.498092	0.614019	0.35094
Colhi_01713	KOG0481	Colhi	0.399129	0.555602	0.325208
Colhi_05538	KOG0523	Colhi	1.01586	0.985286	0.44224
Colhi_00130	KOG0524	Colhi	0.779549	0.803547	0.419703
Colhi_01099	KOG0556	Colhi	0.541995	0.654261	0.369467
Colhi_03580	KOG0602	Colhi	0.472771	0.695801	0.348394
Colhi_09075	KOG0659	Colhi	0.540754	0.773689	0.367434
Colhi_01468	KOG0679	Colhi	0.641841	0.791863	0.387024
Colhi_00812	KOG0727	Colhi	0.607889	0.68282	0.384357
Colhi_00728	KOG0741	Colhi	0.587768	0.667242	0.369669
Colhi_01619	KOG0880	Colhi	0.894551	0.994373	0.462187
Colhi_10296	KOG0922	Colhi	0.40124	0.680224	0.341717
Colhi_06925	KOG0948	Colhi	0.678861	0.747727	0.39097
Colhi_12399	KOG0952	Colhi	0.52005	0.655559	0.344202
Colhi_05305	KOG1036	Colhi	0.492894	0.658155	0.340685
Colhi_06566	KOG1078	Colhi	0.565337	0.715273	0.3759
Colhi_00928	KOG1145	Colhi	0.337544	0.502379	0.31743
Colhi_13538	KOG1148	Colhi	0.714812	0.916484	0.403377
Colhi_00211	KOG1159	Colhi	0.362791	0.651665	0.316729
Colhi_02957	KOG1180	Colhi	0.608661	0.734745	0.388866
Colhi_02156	KOG1342	Colhi	0.52515	0.671137	0.36453
Colhi_01638	KOG1350	Colhi	0.80436	0.782776	0.421009
Colhi_13898	KOG1358	Colhi	0.518857	0.632193	0.349579
Colhi_02529	KOG1390	Colhi	0.8309	0.861963	0.437766
Colhi_15472	KOG1393	Colhi	0.777135	0.81523	0.41985
Colhi_10973	KOG1463	Colhi	0.763442	0.867155	0.4058
Colhi_07626	KOG1487	Colhi	0.634912	0.872348	0.400787
Colhi_15018	KOG1541	Colhi	0.633226	0.899609	0.409897
Colhi_06387	KOG1643	Colhi	0.9868	1.01514	0.471342
Colhi_00228	KOG1885	Colhi	0.823385	0.934658	0.426755
Colhi_06850	KOG1889	Colhi	0.564756	0.82172	0.372241
Colhi_08694	KOG1979	Colhi	0.459259	0.617913	0.343511
Colhi_13279	KOG2509	Colhi	0.498927	0.749025	0.358115
Colhi_02938	KOG2519	Colhi	0.603296	0.836	0.406525
Colhi_11608	KOG2535	Colhi	0.293831	0.590652	0.323712
Colhi_01537	KOG2775	Colhi	0.549805	0.782776	0.384749
Colhi_14621	KOG2971	Colhi	0.507168	0.676329	0.347552
Colhi_00597	KOG3022	Colhi	0.489452	0.833404	0.375348
Colhi_03592	KOG3974	Colhi	0.368353	0.629596	0.347581
Cryne_1594	KOG0209	Cryne	1.07658	0.766683	0.454825
Cryne_4086	KOG0271	Cryne	0.39947	0.630151	0.342783
Cryne_6320	KOG0330	Cryne	0.614482	0.673211	0.378029
Cryne_3350	KOG0418	Cryne	0.535023	0.657457	0.342006
Cryne_229	KOG0434	Cryne	0.961287	0.743578	0.413527
Cryne_3761	KOG0468	Cryne	0.529276	0.646955	0.329229
Cryne_5428	KOG0477	Cryne	0.654572	0.691065	0.371684
Cryne_2797	KOG0481	Cryne	0.627466	0.678462	0.382529
Cryne_3641	KOG0523	Cryne	2.22888	0.884312	0.550379
Cryne_1667	KOG0524	Cryne	1.29942	0.832849	0.496177
Cryne_4171	KOG0556	Cryne	0.889141	0.735176	0.434922
Cryne_2548	KOG0602	Cryne	0.45937	0.646955	0.333795
Cryne_2206	KOG0659	Cryne	0.328582	0.579739	0.307593
Cryne_445	KOG0679	Cryne	2.27412	0.900065	0.54228
Cryne_2657	KOG0727	Cryne	0.708297	0.682663	0.385616
Cryne_5115	KOG0741	Cryne	0.513275	0.641704	0.366295
Cryne_5295	KOG0880	Cryne	1.58469	0.830749	0.519142
Cryne_2433	KOG0922	Cryne	0.34219	0.612296	0.307956
Cryne_4049	KOG0948	Cryne	0.531514	0.655357	0.349376
Cryne_5127	KOG0952	Cryne	0.747304	0.692116	0.370004
Cryne_4462	KOG1036	Cryne	0.43592	0.664809	0.348247
Cryne_3937	KOG1078	Cryne	0.517298	0.655357	0.346671
Cryne_541	KOG1145	Cryne	0.283083	0.579739	0.294153
Cryne_79	KOG1148	Cryne	1.10127	0.75198	0.448816
Cryne_5152	KOG1159	Cryne	0.250348	0.581839	0.278961
Cryne_6104	KOG1180	Cryne	1.2084	0.758281	0.46062
Cryne_4997	KOG1342	Cryne	0.372499	0.619648	0.323426
Cryne_4772	KOG1350	Cryne	2.48033	0.915819	0.564149
Cryne_700	KOG1358	Cryne	0.864236	0.732025	0.432904
Cryne_3362	KOG1390	Cryne	1.41905	0.839151	0.500282
Cryne_5459	KOG1393	Cryne	1.80539	0.846503	0.516447
Cryne_2126	KOG1463	Cryne	0.348718	0.603894	0.306172
Cryne_3117	KOG1487	Cryne	0.486035	0.617548	0.340111
Cryne_247	KOG1541	Cryne	0.367398	0.62805	0.316637
Cryne_4676	KOG1643	Cryne	1.08767	0.772985	0.485642
Cryne_6351	KOG1885	Cryne	1.55447	0.83495	0.506165
Cryne_1867	KOG1889	Cryne	0.488454	0.663759	0.353987
Cryne_4640	KOG1979	Cryne	0.311574	0.588141	0.289874
Cryne_2308	KOG2509	Cryne	0.281327	0.588141	0.304277
Cryne_3666	KOG2519	Cryne	0.564579	0.652206	0.369378
Cryne_1225	KOG2535	Cryne	0.608361	0.690015	0.356161
Cryne_5479	KOG2775	Cryne	0.850808	0.719422	0.409531
Cryne_4354	KOG2971	Cryne	0.803766	0.735176	0.424134
Cryne_4487	KOG3022	Cryne	0.243545	0.553482	0.297058
Cryne_1634	KOG3974	Cryne	0.673921	0.699467	0.39479
Dotse_69481	KOG0209	Dotse	0.331368	0.621797	0.285895
Dotse_56797	KOG0271	Dotse	0.372965	0.627	0.23074
Dotse_73672	KOG0330	Dotse	0.37407	0.640008	0.243338
Dotse_72507	KOG0418	Dotse	0.340582	0.620062	0.290952
Dotse_70200	KOG0434	Dotse	0.353867	0.576701	0.264973
Dotse_71915	KOG0468	Dotse	0.358458	0.627867	0.286846
Dotse_81043	KOG0477	Dotse	0.474826	0.663423	0.365686
Dotse_88914	KOG0481	Dotse	0.441794	0.64868	0.343537
Dotse_67790	KOG0523	Dotse	0.336666	0.623531	0.304374
Dotse_73659	KOG0524	Dotse	0.341759	0.58971	0.311279
Dotse_75655	KOG0556	Dotse	0.442862	0.669494	0.390101
Dotse_78697	KOG0602	Dotse	0.447692	0.654751	0.375059
Dotse_69004	KOG0659	Dotse	0.407971	0.656485	0.408922
Dotse_69997	KOG0679	Dotse	0.344045	0.623531	0.307148
Dotse_74709	KOG0727	Dotse	0.453156	0.666892	0.358649
Dotse_73297	KOG0741	Dotse	0.378708	0.600983	0.332987
Dotse_75187	KOG0880	Dotse	0.349854	0.585373	0.331391
Dotse_178887	KOG0922	Dotse	0.347056	0.626133	0.272536
Dotse_53618	KOG0948	Dotse	0.355059	0.646079	0.326541
Dotse_177124	KOG0952	Dotse	0.454934	0.649548	0.392005
Dotse_74580	KOG1036	Dotse	0.401566	0.626133	0.365515
Dotse_180539	KOG1078	Dotse	0.471286	0.661689	0.381591
Dotse_69660	KOG1145	Dotse	0.347555	0.630469	0.32712
Dotse_69615	KOG1148	Dotse	0.310821	0.613124	0.280551
Dotse_79359	KOG1159	Dotse	0.421661	0.632203	0.362848
Dotse_44633	KOG1180	Dotse	0.345475	0.625266	0.266799
Dotse_87278	KOG1342	Dotse	0.424932	0.661689	0.400393
Dotse_60516	KOG1350	Dotse	0.586148	0.718925	0.52547
Dotse_178794	KOG1358	Dotse	0.411207	0.634805	0.348632
Dotse_71914	KOG1390	Dotse	0.343059	0.623531	0.336504
Dotse_73892	KOG1393	Dotse	0.488434	0.684237	0.414489
Dotse_73115	KOG1463	Dotse	0.377061	0.643477	0.273659
Dotse_68206	KOG1487	Dotse	0.366352	0.601851	0.311163
Dotse_179946	KOG1541	Dotse	0.367022	0.645212	0.396613
Dotse_145827	KOG1643	Dotse	0.407339	0.603585	0.416204
Dotse_77287	KOG1885	Dotse	0.472	0.677299	0.398617
Dotse_68112	KOG1889	Dotse	0.373543	0.585373	0.318685
Dotse_90894	KOG1979	Dotse	0.408297	0.624398	0.353615
Dotse_78550	KOG2509	Dotse	0.400493	0.628734	0.337229
Dotse_174910	KOG2519	Dotse	0.271444	0.601851	0.30359
Dotse_45109	KOG2535	Dotse	0.425723	0.653017	0.403475
Dotse_72174	KOG2775	Dotse	0.339236	0.620062	0.287982
Dotse_63744	KOG2971	Dotse	0.388361	0.632203	0.376582
Dotse_74335	KOG3022	Dotse	0.407268	0.623531	0.339005
Dotse_144271	KOG3974	Dotse	0.41128	0.635672	0.344406
Encin_527	KOG0209	Encin	0.359915	0.600655	0.327538
Encin_680	KOG0271	Encin	0.391852	0.630513	0.320593
Encin_169	KOG0330	Encin	0.374552	0.61295	0.338649
Encin_1516	KOG0418	Encin	0.381822	0.620853	0.330141
Encin_401	KOG0434	Encin	0.416088	0.663004	0.331282
Encin_437	KOG0468	Encin	0.442859	0.677933	0.336908
Encin_871	KOG0477	Encin	0.398336	0.657735	0.340046
Encin_1135	KOG0481	Encin	0.401795	0.638416	0.331284
Encin_1112	KOG0523	Encin	0.36842	0.597143	0.322778
Encin_904	KOG0524	Encin	0.358307	0.595387	0.324567
Encin_1180	KOG0556	Encin	0.411239	0.663882	0.336211
Encin_631	KOG0602	Encin	0.365005	0.610315	0.321132
Encin_639	KOG0659	Encin	0.372658	0.614706	0.323004
Encin_30	KOG0679	Encin	0.471851	0.684958	0.327979
Encin_138	KOG0727	Encin	0.374547	0.657735	0.356464
Encin_775	KOG0741	Encin	0.418323	0.649832	0.335172
Encin_1476	KOG0880	Encin	0.463214	0.68408	0.335141
Encin_1645	KOG0922	Encin	0.361986	0.604168	0.326129
Encin_877	KOG0948	Encin	0.393077	0.649832	0.335864
Encin_1342	KOG0952	Encin	0.404667	0.659492	0.327343
Encin_1258	KOG1036	Encin	0.391716	0.64105	0.326853
Encin_663	KOG1078	Encin	0.386556	0.619975	0.330586
Encin_1637	KOG1145	Encin	0.360723	0.578702	0.334501
Encin_269	KOG1148	Encin	0.403447	0.642807	0.330338
Encin_971	KOG1159	Encin	0.3786	0.606803	0.322903
Encin_214	KOG1180	Encin	0.353038	0.627878	0.344621
Encin_770	KOG1342	Encin	0.415537	0.663882	0.325682
Encin_227	KOG1350	Encin	0.412418	0.673542	0.349688
Encin_580	KOG1358	Encin	0.399362	0.634903	0.338881
Encin_1195	KOG1390	Encin	0.362381	0.596265	0.334342
Encin_174	KOG1393	Encin	0.396499	0.640172	0.329735
Encin_1318	KOG1463	Encin	0.420944	0.652466	0.333424
Encin_990	KOG1487	Encin	0.390911	0.639294	0.341273
Encin_1047	KOG1541	Encin	0.382401	0.626122	0.328367
Encin_315	KOG1643	Encin	0.380208	0.605924	0.322647
Encin_844	KOG1885	Encin	0.421639	0.662126	0.33779
Encin_750	KOG1889	Encin	0.394871	0.635782	0.329006
Encin_978	KOG1979	Encin	0.388477	0.621731	0.335013
Encin_861	KOG2509	Encin	0.393357	0.625244	0.332661
Encin_742	KOG2519	Encin	0.382288	0.624366	0.347266
Encin_1542	KOG2535	Encin	0.383936	0.634903	0.3328
Encin_199	KOG2775	Encin	0.393488	0.645441	0.337183
Encin_20	KOG2971	Encin	0.418894	0.66037	0.334329
Encin_410	KOG3022	Encin	0.386398	0.63666	0.339506
Encin_772	KOG3974	Encin	0.367154	0.585727	0.328856
EV44_g1111	KOG0209	Eryne	0.383991	0.631254	0.310271
EV44_g5742	KOG0271	Eryne	0.385031	0.618493	0.304848
EV44_g2365	KOG0330	Eryne	0.362219	0.611687	0.285651
EV44_g5641	KOG0418	Eryne	0.396676	0.653373	0.275251
EV44_g2027	KOG0434	Eryne	0.400778	0.64997	0.333682
EV44_g0831	KOG0468	Eryne	0.392868	0.632955	0.344308
EV44_g6476	KOG0477	Eryne	0.391534	0.640612	0.350589
EV44_g5105	KOG0481	Eryne	0.384656	0.645716	0.347539
EV44_g0863	KOG0523	Eryne	0.38563	0.635507	0.328221
EV44_g1871	KOG0524	Eryne	0.388693	0.632955	0.369251
EV44_g1818	KOG0556	Eryne	0.407391	0.664433	0.357957
EV44_g2959	KOG0602	Eryne	0.388367	0.639761	0.330093
EV44_g2153	KOG0659	Eryne	0.37407	0.603179	0.308999
EV44_g2639	KOG0679	Eryne	0.397109	0.628701	0.387749
EV44_g1636	KOG0727	Eryne	0.413281	0.644015	0.333364
EV44_g4387	KOG0741	Eryne	0.401039	0.636358	0.349237
EV44_g0076	KOG0880	Eryne	0.405624	0.621896	0.375572
EV44_g1672	KOG0922	Eryne	0.370548	0.621896	0.316344
EV44_g2985	KOG0948	Eryne	0.403548	0.643164	0.348048
EV44_g1377	KOG0952	Eryne	0.397978	0.644015	0.307708
EV44_g1533	KOG1036	Eryne	0.389492	0.637209	0.369634
EV44_g2073	KOG1078	Eryne	0.400938	0.631254	0.324884
EV44_g2211	KOG1145	Eryne	0.398386	0.647418	0.349965
EV44_g1014	KOG1148	Eryne	0.393271	0.644015	0.317185
EV44_g2394	KOG1159	Eryne	0.393859	0.630403	0.301087
EV44_g5135	KOG1180	Eryne	0.394108	0.639761	0.314033
EV44_g4954	KOG1342	Eryne	0.393775	0.660179	0.312149
EV44_g2678	KOG1350	Eryne	0.403439	0.653373	0.392465
EV44_g2403	KOG1358	Eryne	0.380251	0.624448	0.302693
EV44_g0300	KOG1390	Eryne	0.386903	0.640612	0.338444
EV44_g4422	KOG1393	Eryne	0.372102	0.597224	0.348216
EV44_g2311	KOG1463	Eryne	0.394596	0.635507	0.326073
EV44_g1994	KOG1487	Eryne	0.384316	0.627851	0.30419
EV44_g4938	KOG1541	Eryne	0.393603	0.646567	0.318176
EV44_g4684	KOG1643	Eryne	0.391319	0.609985	0.359471
EV44_g2088	KOG1885	Eryne	0.38169	0.640612	0.323528
EV44_g2466	KOG1889	Eryne	0.38257	0.632104	0.328856
EV44_g5890	KOG1979	Eryne	0.388585	0.635507	0.361417
EV44_g2587	KOG2509	Eryne	0.37795	0.639761	0.32047
EV44_g1409	KOG2519	Eryne	0.421048	0.648269	0.402883
EV44_g2066	KOG2535	Eryne	0.382087	0.640612	0.301648
EV44_g2101	KOG2775	Eryne	0.407897	0.639761	0.361152
EV44_g4678	KOG2971	Eryne	0.400264	0.63806	0.339623
EV44_g1385	KOG3022	Eryne	0.384084	0.636358	0.368847
EV44_g1475	KOG3974	Eryne	0.355774	0.586164	0.298456
Fusgr2813	KOG0209	Fusgr	1.05777	0.950701	0.440096
Fusgr6612	KOG0271	Fusgr	0.452934	0.678683	0.337247
Fusgr4039	KOG0330	Fusgr	0.6868	0.803811	0.394955
Fusgr2330	KOG0418	Fusgr	0.433069	0.685484	0.355162
Fusgr12989	KOG0434	Fusgr	0.670359	0.765729	0.38332
Fusgr10796	KOG0468	Fusgr	0.586553	0.723566	0.365021
Fusgr2997	KOG0477	Fusgr	0.619662	0.765729	0.373007
Fusgr7835	KOG0481	Fusgr	0.557453	0.727646	0.3614
Fusgr11574	KOG0523	Fusgr	1.3291	1.12479	0.459212
Fusgr5447	KOG0524	Fusgr	1.13703	1.02279	0.463392
Fusgr3447	KOG0556	Fusgr	1.15936	1.04591	0.470696
Fusgr11457	KOG0602	Fusgr	0.572246	0.746688	0.355392
Fusgr8602	KOG0659	Fusgr	0.556176	0.771169	0.379904
Fusgr8495	KOG0679	Fusgr	1.35285	1.11255	0.460928
Fusgr12933	KOG0727	Fusgr	0.775647	0.854134	0.401088
Fusgr12776	KOG0741	Fusgr	0.671685	0.763009	0.381444
Fusgr8620	KOG0880	Fusgr	1.07859	1.03775	0.481273
Fusgr5820	KOG0922	Fusgr	0.467139	0.669163	0.348034
Fusgr1909	KOG0948	Fusgr	0.819836	0.873176	0.419809
Fusgr7396	KOG0952	Fusgr	0.571848	0.696364	0.360708
Fusgr7203	KOG1036	Fusgr	0.500572	0.684124	0.343874
Fusgr9363	KOG1078	Fusgr	0.892983	0.886777	0.426537
Fusgr7344	KOG1145	Fusgr	0.442898	0.659642	0.364216
Fusgr2922	KOG1148	Fusgr	0.955833	0.909898	0.432372
Fusgr11077	KOG1159	Fusgr	0.344015	0.569876	0.320813
Fusgr4783	KOG1180	Fusgr	0.396054	0.591638	0.331664
Fusgr919	KOG1342	Fusgr	0.600917	0.719486	0.372368
Fusgr3716	KOG1350	Fusgr	1.17133	1.02415	0.472532
Fusgr9197	KOG1358	Fusgr	0.613681	0.741247	0.378845
Fusgr10797	KOG1390	Fusgr	1.29405	1.08263	0.483598
Fusgr10730	KOG1393	Fusgr	1.2085	1.09079	0.460407
Fusgr382	KOG1463	Fusgr	0.741784	0.866375	0.399696
Fusgr8386	KOG1487	Fusgr	0.594882	0.772529	0.391482
Fusgr6646	KOG1541	Fusgr	0.594767	0.794291	0.384421
Fusgr7745	KOG1643	Fusgr	1.3488	1.16831	0.496981
Fusgr9456	KOG1885	Fusgr	1.16178	1.02823	0.463187
Fusgr816	KOG1889	Fusgr	0.691442	0.836453	0.401235
Fusgr11260	KOG1979	Fusgr	0.341856	0.576677	0.331354
Fusgr3636	KOG2509	Fusgr	0.478335	0.682764	0.346553
Fusgr12912	KOG2519	Fusgr	0.611912	0.799731	0.397762
Fusgr2342	KOG2535	Fusgr	0.802755	0.871816	0.39379
Fusgr11936	KOG2775	Fusgr	0.897815	0.93846	0.426023
Fusgr3701	KOG2971	Fusgr	0.715139	0.831013	0.400626
Fusgr11314	KOG3022	Fusgr	0.412958	0.62836	0.322582
Fusgr1255	KOG3974	Fusgr	0.500333	0.690924	0.359661
GLRG_08881T0	KOG0209	Colgr	0.725133	0.834625	0.403325
GLRG_09030T0	KOG0271	Colgr	0.58215	1.01337	0.382544
GLRG_11663T0	KOG0330	Colgr	0.404673	0.5225	0.312734
GLRG_01051T0	KOG0418	Colgr	0.634832	0.8415	0.389995
GLRG_07296T0	KOG0434	Colgr	0.496965	0.64075	0.363089
GLRG_00658T0	KOG0468	Colgr	0.409825	0.573375	0.331348
GLRG_03529T0	KOG0477	Colgr	0.469912	0.58575	0.354304
GLRG_03134T0	KOG0481	Colgr	0.483254	0.614625	0.336472
GLRG_07517T0	KOG0523	Colgr	0.972354	0.9955	0.444343
GLRG_02679T0	KOG0524	Colgr	0.784145	0.823625	0.420674
GLRG_02432T0	KOG0556	Colgr	0.741458	0.88	0.429026
GLRG_04227T0	KOG0602	Colgr	0.534502	0.686125	0.355797
GLRG_03221T0	KOG0659	Colgr	0.585919	0.873125	0.379745
GLRG_03056T0	KOG0679	Colgr	1.00895	0.966625	0.450993
GLRG_02009T0	KOG0727	Colgr	0.623377	0.7205	0.383378
GLRG_06308T0	KOG0741	Colgr	0.525266	0.622875	0.362574
GLRG_03208T0	KOG0880	Colgr	0.841366	0.977625	0.452552
GLRG_08702T0	KOG0922	Colgr	0.455622	0.803	0.361508
GLRG_09982T0	KOG0948	Colgr	0.591367	0.70675	0.38517
GLRG_02808T0	KOG0952	Colgr	0.527133	0.719125	0.359099
GLRG_02832T0	KOG1036	Colgr	0.495716	0.666875	0.352157
GLRG_02504T0	KOG1078	Colgr	0.613295	0.768625	0.389236
GLRG_06759T0	KOG1145	Colgr	0.353745	0.51975	0.324783
GLRG_09153T0	KOG1148	Colgr	0.639532	0.82225	0.405724
GLRG_05734T0	KOG1159	Colgr	0.777864	0.939125	0.417398
GLRG_08303T0	KOG1180	Colgr	0.637925	0.7315	0.395113
GLRG_00900T0	KOG1342	Colgr	0.606861	0.677875	0.377371
GLRG_08081T0	KOG1350	Colgr	0.959361	0.892375	0.448265
GLRG_05647T0	KOG1358	Colgr	0.489166	0.61325	0.342273
GLRG_00657T0	KOG1390	Colgr	0.794806	0.858	0.442082
GLRG_08768T0	KOG1393	Colgr	0.834761	0.91575	0.432983
GLRG_05077T0	KOG1463	Colgr	0.630682	0.782375	0.380767
GLRG_03675T0	KOG1487	Colgr	0.552822	0.776875	0.376647
GLRG_08981T0	KOG1541	Colgr	0.588852	0.941875	0.421024
GLRG_00063T0	KOG1643	Colgr	0.908701	1.0505	0.464561
GLRG_05447T0	KOG1885	Colgr	0.847398	0.924	0.437957
GLRG_00769T0	KOG1889	Colgr	0.762563	1.1	0.418526
GLRG_05724T0	KOG1979	Colgr	0.358958	0.565125	0.326706
GLRG_07306T0	KOG2509	Colgr	0.419396	0.6105	0.33501
GLRG_10777T0	KOG2519	Colgr	0.52443	0.73425	0.391267
GLRG_01049T0	KOG2535	Colgr	0.434208	0.672375	0.338526
GLRG_10223T0	KOG2775	Colgr	0.51236	0.73425	0.374831
GLRG_08075T0	KOG2971	Colgr	0.404937	0.55275	0.324658
GLRG_06179T0	KOG3022	Colgr	0.470653	0.823625	0.365661
GLRG_06448T0	KOG3974	Colgr	0.313842	0.715	0.34776
GMDG_02346	KOG0209	Geode	0.652218	0.696146	0.385426
GMDG_05292	KOG0271	Geode	0.39987	0.655127	0.310822
GMDG_03374	KOG0330	Geode	0.500656	0.687942	0.357734
GMDG_05335	KOG0418	Geode	0.458296	0.642236	0.33652
GMDG_03706	KOG0434	Geode	0.414557	0.570746	0.315153
GMDG_00739	KOG0468	Geode	0.398907	0.57895	0.324378
GMDG_03946	KOG0477	Geode	0.55765	0.714897	0.375695
GMDG_01084	KOG0481	Geode	0.472031	0.652783	0.35001
GMDG_04042	KOG0523	Geode	0.920108	0.936398	0.408824
GMDG_00926	KOG0524	Geode	0.741395	0.793419	0.413143
GMDG_07874	KOG0556	Geode	0.531977	0.723101	0.394728
GMDG_04981	KOG0602	Geode	0.55302	0.791075	0.378018
GMDG_08446	KOG0659	Geode	0.370391	0.693802	0.341104
GMDG_01001	KOG0679	Geode	0.96629	0.861393	0.408129
GMDG_01331	KOG0727	Geode	0.618655	0.714897	0.375916
GMDG_05471	KOG0741	Geode	0.520309	0.706693	0.362177
GMDG_06522	KOG0880	Geode	0.729475	0.903583	0.420907
GMDG_03345	KOG0922	Geode	0.331302	0.551994	0.316415
GMDG_08433	KOG0948	Geode	0.575236	0.70435	0.373743
GMDG_04178	KOG0952	Geode	0.425941	0.594185	0.315395
GMDG_04089	KOG1036	Geode	0.430845	0.611764	0.335791
GMDG_02413	KOG1078	Geode	0.537925	0.766464	0.39917
GMDG_07846	KOG1145	Geode	0.390622	0.575434	0.323853
GMDG_06586	KOG1148	Geode	0.540175	0.766464	0.374856
GMDG_07942	KOG1159	Geode	0.408162	0.728961	0.345264
GMDG_01465	KOG1180	Geode	0.675796	0.850845	0.411435
GMDG_07213	KOG1342	Geode	0.497165	0.659815	0.32836
GMDG_03486	KOG1350	Geode	0.94325	0.863736	0.426724
GMDG_03132	KOG1358	Geode	0.447728	0.707865	0.375528
GMDG_00729	KOG1390	Geode	0.840644	0.802794	0.421198
GMDG_00458	KOG1393	Geode	0.708642	0.87194	0.406696
GMDG_02227	KOG1463	Geode	0.493166	0.706693	0.351542
GMDG_03817	KOG1487	Geode	0.54885	0.733649	0.379146
GMDG_02024	KOG1541	Geode	0.475346	0.687942	0.343868
GMDG_04235	KOG1643	Geode	0.894808	0.922335	0.440003
GMDG_01773	KOG1885	Geode	0.739615	0.860221	0.4254
GMDG_01746	KOG1889	Geode	0.40935	0.676222	0.331073
GMDG_04283	KOG1979	Geode	0.331151	0.536759	0.316212
GMDG_03276	KOG2509	Geode	0.252119	0.570746	0.327396
GMDG_01361	KOG2519	Geode	0.514507	0.727789	0.379798
GMDG_00680	KOG2535	Geode	0.397365	0.576606	0.340424
GMDG_07203	KOG2775	Geode	0.310804	0.672707	0.364906
GMDG_03496	KOG2971	Geode	0.487946	0.68091	0.370307
GMDG_06388	KOG3022	Geode	0.468483	0.700834	0.317644
GMDG_05466	KOG3974	Geode	0.300078	0.637548	0.331424
Maggr111710	KOG0209	Maggr	0.595127	0.686554	0.368431
Maggr118543	KOG0271	Maggr	0.399666	0.716892	0.332566
Maggr116533	KOG0330	Maggr	0.462361	0.60228	0.335115
Maggr113462	KOG0418	Maggr	0.444547	0.619134	0.347562
Maggr112673	KOG0434	Maggr	0.463561	0.607898	0.345505
Maggr118885	KOG0468	Maggr	0.392773	0.595538	0.323593
Maggr120575	KOG0477	Maggr	0.510815	0.628124	0.361622
Maggr121530	KOG0481	Maggr	0.491375	0.633742	0.352796
Maggr114274	KOG0523	Maggr	0.738731	0.803414	0.425526
Maggr121611	KOG0524	Maggr	0.723249	0.857349	0.40316
Maggr117461	KOG0556	Maggr	0.545723	0.746108	0.376678
Maggr116699	KOG0602	Maggr	0.465428	0.638237	0.358994
Maggr115168	KOG0659	Maggr	0.628677	0.888812	0.382108
Maggr111402	KOG0679	Maggr	0.804246	0.838247	0.401469
Maggr115649	KOG0727	Maggr	0.566348	0.702285	0.389998
Maggr114218	KOG0741	Maggr	0.51097	0.680935	0.387417
Maggr120534	KOG0880	Maggr	0.670962	0.801167	0.423858
Maggr114327	KOG0922	Maggr	0.299168	0.478677	0.275619
Maggr111471	KOG0948	Maggr	0.493672	0.628124	0.356372
Maggr118115	KOG0952	Maggr	0.392058	0.569694	0.325642
Maggr118126	KOG1036	Maggr	0.368323	0.61464	0.315081
Maggr117707	KOG1078	Maggr	0.577635	0.729253	0.380292
Maggr115707	KOG1145	Maggr	0.394232	0.56857	0.336208
Maggr111679	KOG1148	Maggr	0.473436	0.640484	0.350075
Maggr120775	KOG1159	Maggr	0.595812	0.707903	0.401099
Maggr119998	KOG1180	Maggr	0.655332	0.768581	0.415776
Maggr118395	KOG1342	Maggr	0.426408	0.576435	0.350881
Maggr112634	KOG1350	Maggr	0.80363	0.815774	0.416451
Maggr115698	KOG1358	Maggr	0.474117	0.709027	0.357008
Maggr118886	KOG1390	Maggr	0.717106	0.840495	0.436327
Maggr115527	KOG1393	Maggr	0.717551	0.880946	0.438884
Maggr112663	KOG1463	Maggr	0.508508	0.69779	0.363177
Maggr113272	KOG1487	Maggr	0.52131	0.711274	0.375444
Maggr118538	KOG1541	Maggr	0.403455	0.76521	0.367305
Maggr119497	KOG1643	Maggr	0.778052	0.86971	0.443236
Maggr116856	KOG1885	Maggr	0.604636	0.762962	0.407423
Maggr119609	KOG1889	Maggr	0.430423	0.655091	0.366944
Maggr120779	KOG1979	Maggr	0.369883	0.562952	0.326933
Maggr112683	KOG2509	Maggr	0.352189	0.552839	0.309221
Maggr118666	KOG2519	Maggr	0.488895	0.595538	0.343727
Maggr113465	KOG2535	Maggr	0.361895	0.562952	0.317514
Maggr115585	KOG2775	Maggr	0.45721	0.656215	0.405378
Maggr115473	KOG2971	Maggr	0.496214	0.748355	0.398219
Maggr118084	KOG3022	Maggr	0.289549	0.518005	0.305785
Maggr120239	KOG3974	Maggr	0.308454	0.630371	0.312296
Mellp116155	KOG0209	Mellp	0.357314	0.608983	0.328598
Mellp34581	KOG0271	Mellp	0.550841	0.681953	0.314829
Mellp75483	KOG0330	Mellp	0.513834	0.648621	0.327866
Mellp37906	KOG0418	Mellp	0.588701	0.713483	0.332172
Mellp33688	KOG0434	Mellp	0.575174	0.698168	0.324414
Mellp74057	KOG0468	Mellp	0.392393	0.623397	0.339074
Mellp76084	KOG0477	Mellp	0.526193	0.669341	0.33695
Mellp74054	KOG0481	Mellp	0.503977	0.635108	0.329531
Mellp46148	KOG0523	Mellp	0.457603	0.719789	0.355229
Mellp49370	KOG0524	Mellp	0.501475	0.700871	0.349106
Mellp51822	KOG0556	Mellp	0.508092	0.681953	0.344254
Mellp89984	KOG0602	Mellp	0.480545	0.673845	0.32601
Mellp32688	KOG0659	Mellp	0.596788	0.699069	0.324308
Mellp45600	KOG0679	Mellp	0.400961	0.696366	0.3712
Mellp45420	KOG0727	Mellp	0.533271	0.678349	0.342538
Mellp47546	KOG0741	Mellp	0.446625	0.628802	0.341816
Mellp106888	KOG0880	Mellp	0.516323	0.703573	0.358501
Mellp46519	KOG0922	Mellp	0.418171	0.63781	0.34553
Mellp111500	KOG0948	Mellp	0.484359	0.664836	0.335387
Mellp115274	KOG0952	Mellp	0.408517	0.63781	0.337092
Mellp92212	KOG1036	Mellp	0.422808	0.629703	0.337007
Mellp44773	KOG1078	Mellp	0.493854	0.670241	0.340917
Mellp38379	KOG1145	Mellp	0.529666	0.63781	0.335497
Mellp42176	KOG1148	Mellp	0.538505	0.674746	0.332618
Mellp75350	KOG1159	Mellp	0.478362	0.681953	0.33055
Mellp102462	KOG1180	Mellp	0.51156	0.683754	0.350643
Mellp74327	KOG1342	Mellp	0.524215	0.698168	0.319103
Mellp45062	KOG1350	Mellp	0.439256	0.724293	0.37274
Mellp43664	KOG1358	Mellp	0.530267	0.681052	0.3332
Mellp37614	KOG1390	Mellp	0.547165	0.684655	0.35332
Mellp46585	KOG1393	Mellp	0.413501	0.675647	0.35449
Mellp115081	KOG1463	Mellp	0.578247	0.71078	0.335149
Mellp74871	KOG1487	Mellp	0.39703	0.591866	0.335574
Mellp54207	KOG1541	Mellp	0.610543	0.717086	0.326126
Mellp85707	KOG1643	Mellp	0.427817	0.648621	0.366069
Mellp104502	KOG1885	Mellp	0.572101	0.69006	0.332353
Mellp79596	KOG1889	Mellp	0.367019	0.603578	0.338734
Mellp111529	KOG1979	Mellp	0.478844	0.653125	0.339034
Mellp77928	KOG2509	Mellp	0.485149	0.673845	0.339767
Mellp110505	KOG2519	Mellp	0.364302	0.583759	0.335564
Mellp45092	KOG2535	Mellp	0.408623	0.633306	0.321189
Mellp46796	KOG2775	Mellp	0.396128	0.615289	0.345832
Mellp115595	KOG2971	Mellp	0.357426	0.590966	0.338274
Mellp32805	KOG3022	Mellp	0.503055	0.697267	0.337784
Mellp50177	KOG3974	Mellp	0.525968	0.692763	0.325383
Metac_1201	KOG0209	Metac	0.59026	0.725482	0.381982
Metac_4538	KOG0271	Metac	0.33738	0.573382	0.301463
Metac_5437	KOG0330	Metac	0.441469	0.656545	0.343681
Metac_1976	KOG0418	Metac	0.402982	0.628094	0.344366
Metac_8748	KOG0434	Metac	0.375081	0.558063	0.314754
Metac_6607	KOG0468	Metac	0.424425	0.643414	0.340707
Metac_1210	KOG0477	Metac	0.529329	0.683901	0.363093
Metac_5980	KOG0481	Metac	0.456651	0.665298	0.343356
Metac_1145	KOG0523	Metac	0.763774	0.832717	0.406584
Metac_5820	KOG0524	Metac	0.748272	0.821775	0.40407
Metac_6778	KOG0556	Metac	0.496518	0.680618	0.361422
Metac_6190	KOG0602	Metac	0.427186	0.623717	0.338864
Metac_2431	KOG0659	Metac	0.536402	0.863356	0.373078
Metac_5223	KOG0679	Metac	0.847078	0.867733	0.429269
Metac_1460	KOG0727	Metac	0.556206	0.710162	0.380499
Metac_3602	KOG0741	Metac	0.433374	0.617152	0.356775
Metac_2420	KOG0880	Metac	0.527038	0.718916	0.389049
Metac_6108	KOG0922	Metac	0.350828	0.59855	0.322299
Metac_5806	KOG0948	Metac	0.505905	0.704691	0.361673
Metac_6395	KOG0952	Metac	0.43253	0.606209	0.332961
Metac_1301	KOG1036	Metac	0.365995	0.595267	0.318068
Metac_977	KOG1078	Metac	0.552719	0.707974	0.358092
Metac_4696	KOG1145	Metac	0.384075	0.596361	0.329568
Metac_4248	KOG1148	Metac	0.521888	0.643414	0.357029
Metac_7756	KOG1159	Metac	0.439526	0.665298	0.334587
Metac_2652	KOG1180	Metac	0.584975	0.73533	0.386412
Metac_5475	KOG1342	Metac	0.531883	0.67077	0.376702
Metac_8054	KOG1350	Metac	0.721701	0.79223	0.420855
Metac_1689	KOG1358	Metac	0.401493	0.589796	0.333431
Metac_6608	KOG1390	Metac	0.722606	0.825058	0.429
Metac_3418	KOG1393	Metac	0.7076	0.814115	0.413358
Metac_7207	KOG1463	Metac	0.471975	0.710162	0.346283
Metac_8652	KOG1487	Metac	0.411946	0.640131	0.337279
Metac_7483	KOG1541	Metac	0.475608	0.869921	0.395839
Metac_401	KOG1643	Metac	0.722538	0.826152	0.409033
Metac_7482	KOG1885	Metac	0.708944	0.852414	0.41072
Metac_7271	KOG1889	Metac	0.485641	0.73533	0.37949
Metac_656	KOG1979	Metac	0.368046	0.558063	0.32068
Metac_1822	KOG2509	Metac	0.325253	0.677335	0.318725
Metac_1469	KOG2519	Metac	0.422605	0.641225	0.351866
Metac_1978	KOG2535	Metac	0.522832	0.711257	0.353256
Metac_7036	KOG2775	Metac	0.558984	0.724387	0.391726
Metac_173	KOG2971	Metac	0.460159	0.665298	0.350499
Metac_1358	KOG3022	Metac	0.350079	0.654356	0.336939
Metac_5252	KOG3974	Metac	0.35435	0.648885	0.339922
Monro_007853811	KOG0209	Monro	0.433553	0.656584	0.353727
Monro_007851680	KOG0271	Monro	0.396353	0.621274	0.329796
Monro_007845522	KOG0330	Monro	0.366169	0.599324	0.320577
Monro_007853441	KOG0418	Monro	0.414992	0.635589	0.342345
Monro_007845828	KOG0434	Monro	0.430711	0.65563	0.353183
Monro_007846295	KOG0468	Monro	0.39387	0.632726	0.349867
Monro_007845445	KOG0477	Monro	0.438164	0.669945	0.356602
Monro_007844252	KOG0481	Monro	0.385679	0.625091	0.3389
Monro_007856611	KOG0523	Monro	0.50732	0.710982	0.375389
Monro_007846500	KOG0524	Monro	0.499016	0.717662	0.379096
Monro_007854615	KOG0556	Monro	0.444011	0.6709	0.362945
Monro_007847152	KOG0602	Monro	0.425603	0.657539	0.353648
Monro_007844751	KOG0659	Monro	0.375764	0.613639	0.333906
Monro_007845047	KOG0679	Monro	0.375384	0.623183	0.3385
Monro_007845521	KOG0727	Monro	0.416668	0.643224	0.3541
Monro_007847366	KOG0741	Monro	0.401409	0.630817	0.343085
Monro_007845834	KOG0880	Monro	0.569101	0.736749	0.424781
Monro_007844633	KOG0922	Monro	0.348606	0.596461	0.327989
Monro_007850613	KOG0948	Monro	0.402824	0.640361	0.345423
Monro_007847494	KOG0952	Monro	0.452633	0.678534	0.362621
Monro_007855198	KOG1036	Monro	0.418162	0.654676	0.344402
Monro_007850375	KOG1078	Monro	0.447158	0.6709	0.352053
Monro_007849657	KOG1145	Monro	0.377163	0.615548	0.334717
Monro_007848054	KOG1148	Monro	0.432294	0.656584	0.347821
Monro_007856160	KOG1159	Monro	0.364077	0.604096	0.324687
Monro_007849668	KOG1180	Monro	0.489885	0.703347	0.381944
Monro_007844216	KOG1342	Monro	0.359502	0.611731	0.337511
Monro_007857359	KOG1350	Monro	0.622677	0.795918	0.412982
Monro_007850141	KOG1358	Monro	0.452469	0.674717	0.365905
Monro_007844888	KOG1390	Monro	0.549455	0.75679	0.387633
Monro_007846041	KOG1393	Monro	0.563054	0.773014	0.401739
Monro_007844621	KOG1463	Monro	0.407764	0.634635	0.332232
Monro_007844915	KOG1487	Monro	0.382792	0.614594	0.358346
Monro_007847910	KOG1541	Monro	0.353392	0.596461	0.323138
Monro_007847767	KOG1643	Monro	0.497619	0.701438	0.376741
Monro_007852582	KOG1885	Monro	0.461081	0.692849	0.371383
Monro_007844265	KOG1889	Monro	0.392844	0.635589	0.337638
Monro_007850737	KOG1979	Monro	0.389149	0.616502	0.328583
Monro_007844395	KOG2509	Monro	0.378955	0.62032	0.328932
Monro_007849360	KOG2519	Monro	0.416705	0.644178	0.365938
Monro_007851124	KOG2535	Monro	0.365444	0.606959	0.337857
Monro_007849831	KOG2775	Monro	0.406001	0.642269	0.359842
Monro_007855752	KOG2971	Monro	0.342904	0.602187	0.314899
Monro_007846013	KOG3022	Monro	0.409488	0.638452	0.347899
Monro_007846031	KOG3974	Monro	0.404984	0.625091	0.352119
MYCFIDRAFT_206620T0	KOG0209	Mycfi	0.43055	0.652032	0.351805
MYCFIDRAFT_30851T0	KOG0271	Mycfi	0.403909	0.636536	0.350335
MYCFIDRAFT_83332T0	KOG0330	Mycfi	0.370111	0.60316	0.35948
MYCFIDRAFT_86484T0	KOG0418	Mycfi	0.604781	0.839179	0.38523
MYCFIDRAFT_125245T0	KOG0434	Mycfi	0.364947	0.596008	0.287253
MYCFIDRAFT_142180T0	KOG0468	Mycfi	0.431352	0.655608	0.291367
MYCFIDRAFT_189328T0	KOG0477	Mycfi	0.530031	0.668721	0.360858
MYCFIDRAFT_32938T0	KOG0481	Mycfi	0.486398	0.671105	0.360385
MYCFIDRAFT_71376T0	KOG0523	Mycfi	0.745786	0.821298	0.397509
MYCFIDRAFT_61078T0	KOG0524	Mycfi	0.591265	0.724745	0.303081
MYCFIDRAFT_160086T0	KOG0556	Mycfi	0.593583	0.730705	0.370156
MYCFIDRAFT_36448T0	KOG0602	Mycfi	0.548197	0.719977	0.385156
MYCFIDRAFT_62878T0	KOG0659	Mycfi	0.5284	0.747394	0.317459
MYCFIDRAFT_194801T0	KOG0679	Mycfi	0.968567	0.945268	0.337398
MYCFIDRAFT_45876T0	KOG0727	Mycfi	0.504428	0.721169	0.411634
MYCFIDRAFT_49254T0	KOG0741	Mycfi	0.430991	0.622232	0.310205
MYCFIDRAFT_211936T0	KOG0880	Mycfi	0.697937	0.864211	0.441007
MYCFIDRAFT_127785T0	KOG0922	Mycfi	0.405519	0.616272	0.335137
MYCFIDRAFT_202861T0	KOG0948	Mycfi	0.606122	0.736665	0.349643
MYCFIDRAFT_202824T0	KOG0952	Mycfi	0.445258	0.663952	0.338808
MYCFIDRAFT_41758T0	KOG1036	Mycfi	0.414617	0.675873	0.366547
MYCFIDRAFT_56148T0	KOG1078	Mycfi	0.564931	0.723553	0.364554
MYCFIDRAFT_191409T0	KOG1145	Mycfi	0.53301	0.692561	0.415805
MYCFIDRAFT_42802T0	KOG1148	Mycfi	0.517757	0.706865	0.34763
MYCFIDRAFT_187439T0	KOG1159	Mycfi	0.418091	0.641304	0.312829
MYCFIDRAFT_198907T0	KOG1180	Mycfi	0.648631	0.79865	0.378074
MYCFIDRAFT_154253T0	KOG1342	Mycfi	0.534794	0.688985	0.357285
MYCFIDRAFT_213800T0	KOG1350	Mycfi	0.770805	0.826067	0.349571
MYCFIDRAFT_57486T0	KOG1358	Mycfi	0.453664	0.667529	0.376297
MYCFIDRAFT_212313T0	KOG1390	Mycfi	0.607366	0.749778	0.460653
MYCFIDRAFT_60568T0	KOG1393	Mycfi	0.754873	0.805802	0.379955
MYCFIDRAFT_52075T0	KOG1463	Mycfi	0.506624	0.703289	0.380148
MYCFIDRAFT_48748T0	KOG1487	Mycfi	0.478856	0.661568	0.374438
MYCFIDRAFT_81036T0	KOG1541	Mycfi	0.386828	0.630576	0.33717
MYCFIDRAFT_37568T0	KOG1643	Mycfi	0.429811	0.668721	0.392687
MYCFIDRAFT_193223T0	KOG1885	Mycfi	0.655287	0.773618	0.32885
MYCFIDRAFT_26543T0	KOG1889	Mycfi	0.410095	0.643688	0.330633
MYCFIDRAFT_80777T0	KOG1979	Mycfi	0.411409	0.631768	0.36161
MYCFIDRAFT_203642T0	KOG2509	Mycfi	0.297215	0.555479	0.343244
MYCFIDRAFT_189405T0	KOG2519	Mycfi	0.470966	0.680641	0.313602
MYCFIDRAFT_82365T0	KOG2535	Mycfi	0.402952	0.634152	0.36472
MYCFIDRAFT_41699T0	KOG2775	Mycfi	0.476867	0.687793	0.410737
MYCFIDRAFT_70568T0	KOG2971	Mycfi	0.41072	0.636536	0.386957
MYCFIDRAFT_26808T0	KOG3022	Mycfi	0.346894	0.586471	0.305057
MYCFIDRAFT_27723T0	KOG3974	Mycfi	0.425115	0.654416	0.300499
Mycgr_101482	KOG0209	Mycgr	0.432399	0.658961	0.372986
Mycgr_73745	KOG0271	Mycgr	0.394189	0.701262	0.332379
Mycgr_84402	KOG0330	Mycgr	0.427554	0.644861	0.310494
Mycgr_100874	KOG0418	Mycgr	0.405441	0.662721	0.349713
Mycgr_32217	KOG0434	Mycgr	0.423229	0.658021	0.377027
Mycgr_72117	KOG0468	Mycgr	0.417609	0.64204	0.30299
Mycgr_94100	KOG0477	Mycgr	0.467011	0.661781	0.305122
Mycgr_46995	KOG0481	Mycgr	0.410457	0.658961	0.356045
Mycgr_102318	KOG0523	Mycgr	0.53775	0.760484	0.341604
Mycgr_40235	KOG0524	Mycgr	0.383321	0.61478	0.417371
Mycgr_53676	KOG0556	Mycgr	0.453281	0.661781	0.326393
Mycgr_65376	KOG0602	Mycgr	0.469009	0.689042	0.337773
Mycgr_45390	KOG0659	Mycgr	0.374837	0.6176	0.318912
Mycgr_105948	KOG0679	Mycgr	0.514505	0.727583	0.305643
Mycgr_76782	KOG0727	Mycgr	0.478569	0.696562	0.325642
Mycgr_86671	KOG0741	Mycgr	0.38668	0.646741	0.337404
Mycgr_44978	KOG0880	Mycgr	0.547851	0.776465	0.405105
Mycgr_75505	KOG0922	Mycgr	0.432291	0.6317	0.279409
Mycgr_111559	KOG0948	Mycgr	0.441933	0.655201	0.363499
Mycgr_68519	KOG0952	Mycgr	0.435709	0.63828	0.34543
Mycgr_111499	KOG1036	Mycgr	0.421815	0.689042	0.385123
Mycgr_51289	KOG1078	Mycgr	0.442163	0.658961	0.322785
Mycgr_63707	KOG1145	Mycgr	0.427016	0.63546	0.324332
Mycgr_76205	KOG1148	Mycgr	0.401908	0.63922	0.322539
Mycgr_66305	KOG1159	Mycgr	0.460197	0.694682	0.376106
Mycgr_86257	KOG1180	Mycgr	0.474704	0.689982	0.338567
Mycgr_32193	KOG1342	Mycgr	0.418508	0.713483	0.403312
Mycgr_46697	KOG1350	Mycgr	0.524692	0.734163	0.376597
Mycgr_49166	KOG1358	Mycgr	0.393227	0.61196	0.353749
Mycgr_104498	KOG1390	Mycgr	0.465039	0.680582	0.261862
Mycgr_54740	KOG1393	Mycgr	0.494535	0.705963	0.325605
Mycgr_73579	KOG1463	Mycgr	0.462249	0.680582	0.31643
Mycgr_107086	KOG1487	Mycgr	0.442517	0.648621	0.357484
Mycgr_110071	KOG1541	Mycgr	0.401816	0.62794	0.305278
Mycgr_55968	KOG1643	Mycgr	0.409298	0.666481	0.374938
Mycgr_109091	KOG1885	Mycgr	0.493836	0.708783	0.354708
Mycgr_58320	KOG1889	Mycgr	0.425368	0.655201	0.363973
Mycgr_75629	KOG1979	Mycgr	0.417643	0.61948	0.291772
Mycgr_34973	KOG2509	Mycgr	0.372912	0.61666	0.324948
Mycgr_100567	KOG2519	Mycgr	0.487876	0.721003	0.260776
Mycgr_61567	KOG2535	Mycgr	0.420309	0.6317	0.358792
Mycgr_77395	KOG2775	Mycgr	0.418023	0.656141	0.348087
Mycgr_87034	KOG2971	Mycgr	0.382038	0.64016	0.421404
Mycgr_75204	KOG3022	Mycgr	0.420316	0.660841	0.318987
Mycgr_98664	KOG3974	Mycgr	0.428808	0.670241	0.369998
AAJ76_3500034361T0	KOG0209	Nosce	0.351572	0.620555	0.327151
AAJ76_2100017279T0	KOG0271	Nosce	0.343526	0.615031	0.31669
AAJ76_900080408T0	KOG0330	Nosce	0.375512	0.617793	0.334903
AAJ76_700014852T0	KOG0418	Nosce	0.337374	0.669352	0.326786
AAJ76_5400021149T0	KOG0434	Nosce	0.389266	0.661066	0.326425
AAJ76_1000110873T0	KOG0468	Nosce	0.349606	0.671194	0.314586
AAJ76_1900047116T0	KOG0477	Nosce	0.35652	0.63989	0.317545
AAJ76_3000150672T0	KOG0481	Nosce	0.363986	0.659225	0.32272
AAJ76_1900055189T0	KOG0523	Nosce	0.366047	0.642652	0.319823
AAJ76_730007221T0	KOG0524	Nosce	0.362572	0.592013	0.31755
AAJ76_100022026T0	KOG0556	Nosce	0.37431	0.641731	0.333757
AAJ76_3000013908T0	KOG0602	Nosce	0.365794	0.634366	0.324962
AAJ76_300042306T0	KOG0659	Nosce	0.350884	0.575441	0.317081
AAJ76_500092411T0	KOG0679	Nosce	0.355473	0.691449	0.311206
AAJ76_1600058198T0	KOG0727	Nosce	0.328693	0.623317	0.310675
AAJ76_800013683T0	KOG0741	Nosce	0.392249	0.649097	0.321782
AAJ76_2200010923T0	KOG0880	Nosce	0.384298	0.620555	0.314517
AAJ76_900012560T0	KOG0922	Nosce	0.383419	0.615031	0.337144
AAJ76_3200029278T0	KOG0948	Nosce	0.329896	0.585568	0.328039
AAJ76_4000111203T0	KOG0952	Nosce	0.393111	0.651859	0.339986
AAJ76_2000033894T0	KOG1036	Nosce	0.352802	0.626079	0.305266
AAJ76_2100037969T0	KOG1078	Nosce	0.481306	0.716308	0.354988
AAJ76_560008175T0	KOG1145	Nosce	0.383052	0.655542	0.331187
AAJ76_7000109198T0	KOG1148	Nosce	0.389831	0.638048	0.333708
AAJ76_200094317T0	KOG1159	Nosce	0.37368	0.624238	0.328144
AAJ76_700015829T0	KOG1180	Nosce	0.387299	0.661066	0.333484
AAJ76_800019192T0	KOG1342	Nosce	0.351358	0.619634	0.308764
AAJ76_700039738T0	KOG1350	Nosce	0.355179	0.648176	0.315288
AAJ76_600098093T0	KOG1358	Nosce	0.316395	0.594775	0.317356
AAJ76_600069452T0	KOG1390	Nosce	0.268772	0.553344	0.308728
AAJ76_900056928T0	KOG1393	Nosce	0.365271	0.638048	0.322881
AAJ76_600055689T0	KOG1463	Nosce	0.448983	0.678559	0.342944
AAJ76_1700022863T0	KOG1487	Nosce	0.317351	0.60122	0.319705
AAJ76_300093228T0	KOG1541	Nosce	0.340796	0.615952	0.321205
AAJ76_1400049530T0	KOG1643	Nosce	0.351175	0.6003	0.321474
AAJ76_800067210T0	KOG1885	Nosce	0.369685	0.647256	0.321981
AAJ76_100011660T0	KOG1889	Nosce	0.36539	0.623317	0.326787
AAJ76_1000104899T0	KOG1979	Nosce	0.408078	0.627	0.332199
AAJ76_1800031824T0	KOG2509	Nosce	0.412977	0.650018	0.334544
AAJ76_300038650T0	KOG2519	Nosce	0.366393	0.61411	0.32869
AAJ76_200064760T0	KOG2535	Nosce	0.328156	0.621476	0.318223
AAJ76_900066455T0	KOG2775	Nosce	0.302017	0.576361	0.322303
AAJ76_5000110478T0	KOG2971	Nosce	0.441882	0.669352	0.344035
AAJ76_2000151111T0	KOG3022	Nosce	0.397425	0.668432	0.319793
AAJ76_800023212T0	KOG3974	Nosce	0.413256	0.672115	0.3375
Ophio_5989T0	KOG0209	Ophun	0.433739	0.6821	0.336414
Ophio_2432T0	KOG0271	Ophun	0.413357	0.69635	0.333752
Ophio_732T0	KOG0330	Ophun	0.403266	0.60135	0.319665
Ophio_5534T0	KOG0418	Ophun	0.436957	0.6327	0.33985
Ophio_5023T0	KOG0434	Ophun	0.380035	0.5643	0.327083
Ophio_1521T0	KOG0468	Ophun	0.406737	0.6631	0.343211
Ophio_2624T0	KOG0477	Ophun	0.431422	0.71155	0.345383
Ophio_4664T0	KOG0481	Ophun	0.40375	0.62795	0.32857
Ophio_3842T0	KOG0523	Ophun	0.465873	0.74005	0.35142
Ophio_1846T0	KOG0524	Ophun	0.480761	0.71535	0.358311
Ophio_3786T0	KOG0556	Ophun	0.390126	0.67355	0.34473
Ophio_3717T0	KOG0602	Ophun	0.432053	0.7486	0.359666
Ophio_1475T0	KOG0659	Ophun	0.42631	0.64505	0.341613
Ophio_5489T0	KOG0679	Ophun	0.493523	0.684	0.349931
Ophio_4205T0	KOG0727	Ophun	0.458715	0.6992	0.337549
Ophio_6093T0	KOG0741	Ophun	0.392404	0.6384	0.338321
Ophio_1462T0	KOG0880	Ophun	0.422226	0.58995	0.335754
Ophio_1416T0	KOG0922	Ophun	0.404044	0.65265	0.329423
Ophio_2304T0	KOG0948	Ophun	0.444747	0.71725	0.341987
Ophio_2211T0	KOG0952	Ophun	0.418747	0.6954	0.33323
Ophio_4388T0	KOG1036	Ophun	0.414748	0.6726	0.334173
Ophio_5282T0	KOG1078	Ophun	0.428985	0.65265	0.338683
Ophio_5833T0	KOG1145	Ophun	0.334762	0.5947	0.327602
Ophio_5608T0	KOG1148	Ophun	0.413927	0.68305	0.353872
Ophio_6970T0	KOG1159	Ophun	0.419878	0.6764	0.324783
Ophio_189T0	KOG1180	Ophun	0.473648	0.7505	0.347259
Ophio_698T0	KOG1342	Ophun	0.431221	0.6612	0.361051
Ophio_5259T0	KOG1350	Ophun	0.483925	0.627	0.339615
Ophio_5656T0	KOG1358	Ophun	0.372097	0.58045	0.327324
Ophio_3197T0	KOG1390	Ophun	0.520803	0.76095	0.353765
Ophio_457T0	KOG1393	Ophun	0.479981	0.7239	0.356421
Ophio_1363T0	KOG1463	Ophun	0.488694	0.7733	0.343964
Ophio_4792T0	KOG1487	Ophun	0.397104	0.65265	0.346676
Ophio_789T0	KOG1541	Ophun	0.424349	0.62795	0.328888
Ophio_4527T0	KOG1643	Ophun	0.462413	0.70965	0.3521
Ophio_790T0	KOG1885	Ophun	0.45235	0.64505	0.346429
Ophio_6571T0	KOG1889	Ophun	0.451342	0.73815	0.342671
Ophio_7489T0	KOG1979	Ophun	0.426456	0.71155	0.339312
Ophio_6767T0	KOG2509	Ophun	0.374689	0.6365	0.327224
Ophio_6196T0	KOG2519	Ophun	0.39379	0.6555	0.359446
Ophio_5536T0	KOG2535	Ophun	0.418241	0.6897	0.34844
Ophio_4686T0	KOG2775	Ophun	0.462577	0.7505	0.361333
Ophio_2933T0	KOG2971	Ophun	0.333084	0.5282	0.32298
Ophio_6242T0	KOG3022	Ophun	0.349263	0.63175	0.331791
Ophio_2173T0	KOG3974	Ophun	0.37558	0.59945	0.335722
Pendi1421	KOG0209	Pendi	0.657751	0.734871	0.396331
Pendi2122	KOG0271	Pendi	0.414426	0.66071	0.347415
Pendi5566	KOG0330	Pendi	0.521841	0.664081	0.328513
Pendi2619	KOG0418	Pendi	0.421629	0.635989	0.327553
Pendi5382	KOG0434	Pendi	0.588177	0.703409	0.376684
Pendi7944	KOG0468	Pendi	0.419032	0.630371	0.335597
Pendi1459	KOG0477	Pendi	0.623986	0.729253	0.381344
Pendi4629	KOG0481	Pendi	0.640726	0.705656	0.380658
Pendi7546	KOG0523	Pendi	1.04436	0.910161	0.477971
Pendi5433	KOG0524	Pendi	1.0353	0.889935	0.464153
Pendi6224	KOG0556	Pendi	0.912159	0.859597	0.465742
Pendi6935	KOG0602	Pendi	0.479388	0.696667	0.373569
Pendi481	KOG0659	Pendi	0.378523	0.632618	0.323204
Pendi8384	KOG0679	Pendi	0.489828	0.694419	0.348912
Pendi7856	KOG0727	Pendi	0.610437	0.730376	0.396459
Pendi7825	KOG0741	Pendi	0.463185	0.671946	0.383312
Pendi659	KOG0880	Pendi	0.84614	0.843866	0.485687
Pendi3540	KOG0922	Pendi	0.344228	0.58093	0.327668
Pendi717	KOG0948	Pendi	0.556951	0.687677	0.377069
Pendi6413	KOG0952	Pendi	0.481198	0.653968	0.356352
Pendi316	KOG1036	Pendi	0.522751	0.698914	0.34258
Pendi6225	KOG1078	Pendi	0.632023	0.739366	0.388053
Pendi5592	KOG1145	Pendi	0.380786	0.621382	0.328811
Pendi5575	KOG1148	Pendi	0.68992	0.797796	0.404361
Pendi2376	KOG1159	Pendi	0.356587	0.598909	0.325068
Pendi2305	KOG1180	Pendi	0.67551	0.776446	0.4072
Pendi5879	KOG1342	Pendi	0.595547	0.738242	0.389727
Pendi4109	KOG1350	Pendi	1.14436	0.931511	0.51396
Pendi6903	KOG1358	Pendi	0.639892	0.720263	0.384763
Pendi7945	KOG1390	Pendi	0.897718	0.844989	0.48512
Pendi6076	KOG1393	Pendi	1.10348	0.910161	0.48433
Pendi5558	KOG1463	Pendi	0.483107	0.66071	0.344781
Pendi6050	KOG1487	Pendi	0.562876	0.702285	0.398403
Pendi5460	KOG1541	Pendi	0.419244	0.656215	0.35932
Pendi89	KOG1643	Pendi	1.1355	0.948366	0.508981
Pendi8630	KOG1885	Pendi	0.782774	0.795548	0.450436
Pendi874	KOG1889	Pendi	0.402164	0.634866	0.344081
Pendi1832	KOG1979	Pendi	0.413945	0.621382	0.336173
Pendi7901	KOG2509	Pendi	0.38515	0.65172	0.323622
Pendi1233	KOG2519	Pendi	0.606364	0.729253	0.398144
Pendi2732	KOG2535	Pendi	0.490829	0.689925	0.391084
Pendi751	KOG2775	Pendi	0.640728	0.750602	0.427133
Pendi2142	KOG2971	Pendi	0.665587	0.761839	0.401915
Pendi6729	KOG3022	Pendi	0.49442	0.700038	0.360284
Pendi2281	KOG3974	Pendi	0.299201	0.574188	0.29587
PTRT_05119	KOG0209	Pyrtr	0.56416	0.725878	0.395396
PTRT_02999	KOG0271	Pyrtr	0.347167	0.617694	0.312652
PTRT_08555	KOG0330	Pyrtr	0.486635	0.670041	0.354157
PTRT_00630	KOG0418	Pyrtr	0.511065	0.73751	0.316913
PTRT_00201	KOG0434	Pyrtr	0.491272	0.692143	0.371519
PTRT_07959	KOG0468	Pyrtr	0.438008	0.635143	0.341063
PTRT_01863	KOG0477	Pyrtr	0.500609	0.653755	0.367284
PTRT_09509	KOG0481	Pyrtr	0.450963	0.653755	0.322811
PTRT_05457	KOG0523	Pyrtr	0.770135	0.877102	0.453992
PTRT_08577	KOG0524	Pyrtr	0.684615	0.820102	0.44595
PTRT_07355	KOG0556	Pyrtr	0.527868	0.703776	0.36798
PTRT_02690	KOG0602	Pyrtr	0.568675	0.764265	0.3804
PTRT_06811	KOG0659	Pyrtr	0.562346	0.739837	0.415144
PTRT_06443	KOG0679	Pyrtr	0.433366	0.692143	0.348176
PTRT_03339	KOG0727	Pyrtr	0.529944	0.730531	0.34922
PTRT_02251	KOG0741	Pyrtr	0.467522	0.658408	0.315581
PTRT_02943	KOG0880	Pyrtr	0.546822	0.750306	0.443781
PTRT_08800	KOG0922	Pyrtr	0.327046	0.57698	0.290869
PTRT_03925	KOG0948	Pyrtr	0.477785	0.694469	0.370037
PTRT_07941	KOG0952	Pyrtr	0.508746	0.686327	0.380855
PTRT_09042	KOG1036	Pyrtr	0.419757	0.695633	0.324344
PTRT_06960	KOG1078	Pyrtr	0.534642	0.710755	0.394904
PTRT_06345	KOG1145	Pyrtr	0.403449	0.608388	0.312323
PTRT_05121	KOG1148	Pyrtr	0.447808	0.646776	0.331802
PTRT_09275	KOG1159	Pyrtr	0.391815	0.613041	0.246917
PTRT_11194	KOG1180	Pyrtr	0.603726	0.800327	0.414795
PTRT_10618	KOG1342	Pyrtr	0.492983	0.715408	0.37281
PTRT_03702	KOG1350	Pyrtr	0.762149	0.836388	0.484676
PTRT_06311	KOG1358	Pyrtr	0.441648	0.694469	0.410178
PTRT_07960	KOG1390	Pyrtr	0.619939	0.774735	0.449339
PTRT_08163	KOG1393	Pyrtr	0.708452	0.864306	0.491487
PTRT_02207	KOG1463	Pyrtr	0.449256	0.703776	0.346762
PTRT_00241	KOG1487	Pyrtr	0.416865	0.635143	0.414573
PTRT_02839	KOG1541	Pyrtr	0.360842	0.658408	0.395003
PTRT_05755	KOG1643	Pyrtr	0.72925	0.855	0.488143
PTRT_11451	KOG1885	Pyrtr	0.675575	0.811959	0.376358
PTRT_07071	KOG1889	Pyrtr	0.496484	0.727041	0.373585
PTRT_09008	KOG1979	Pyrtr	0.356598	0.580469	0.313053
PTRT_01471	KOG2509	Pyrtr	0.330714	0.596755	0.284651
PTRT_01978	KOG2519	Pyrtr	0.499642	0.681673	0.356532
PTRT_01312	KOG2535	Pyrtr	0.315406	0.600245	0.316108
PTRT_04371	KOG2775	Pyrtr	0.548275	0.760776	0.430355
PTRT_01025	KOG2971	Pyrtr	0.484472	0.704939	0.398561
PTRT_08989	KOG3022	Pyrtr	0.318784	0.579306	0.266884
PTRT_07561	KOG3974	Pyrtr	0.453693	0.685163	0.368046
PTTG_08661T0	KOG0209	Puctr	0.396929	0.625022	0.320538
PTTG_06887T0	KOG0271	Puctr	0.356946	0.603265	0.328443
PTTG_07768T0	KOG0330	Puctr	0.353425	0.588431	0.324708
PTTG_00646T0	KOG0418	Puctr	0.404292	0.65568	0.322366
PTTG_05140T0	KOG0434	Puctr	0.404297	0.629967	0.303522
PTTG_06021T0	KOG0468	Puctr	0.422736	0.60821	0.324275
PTTG_00313T0	KOG0477	Puctr	0.408754	0.682382	0.316739
PTTG_04134T0	KOG0481	Puctr	0.393091	0.661614	0.32513
PTTG_09784T0	KOG0523	Puctr	0.456161	0.701172	0.317229
PTTG_07476T0	KOG0524	Puctr	0.455785	0.647768	0.331068
PTTG_12145T0	KOG0556	Puctr	0.407294	0.754576	0.295746
PTTG_05722T0	KOG0602	Puctr	0.395956	0.618099	0.319704
PTTG_12059T0	KOG0659	Puctr	0.361117	0.574585	0.321729
PTTG_03340T0	KOG0679	Puctr	0.341967	0.631945	0.309304
PTTG_00226T0	KOG0727	Puctr	0.400053	0.613155	0.301507
PTTG_02632T0	KOG0741	Puctr	0.37878	0.623044	0.306823
PTTG_27668T0	KOG0880	Puctr	0.418274	0.652713	0.347876
PTTG_03386T0	KOG0922	Puctr	0.406353	0.63689	0.319437
PTTG_06628T0	KOG0948	Puctr	0.402253	0.63689	0.32161
PTTG_28288T0	KOG0952	Puctr	0.422548	0.64579	0.318269
PTTG_00592T0	KOG1036	Puctr	0.40695	0.618099	0.351645
PTTG_00881T0	KOG1078	Puctr	0.404137	0.616121	0.323029
PTTG_09466T0	KOG1145	Puctr	0.365897	0.642823	0.286213
PTTG_07866T0	KOG1148	Puctr	0.405767	0.659636	0.328691
PTTG_05597T0	KOG1159	Puctr	0.411641	0.643812	0.328444
PTTG_06017T1	KOG1180	Puctr	0.422674	0.643812	0.325151
PTTG_04745T0	KOG1342	Puctr	0.38701	0.58942	0.353074
PTTG_01840T0	KOG1350	Puctr	0.558132	0.727874	0.335281
PTTG_01107T0	KOG1358	Puctr	0.409662	0.651724	0.332252
PTTG_06403T0	KOG1390	Puctr	0.430581	0.663591	0.331766
PTTG_06166T0	KOG1393	Puctr	0.463005	0.711062	0.355052
PTTG_07667T0	KOG1463	Puctr	0.419727	0.641834	0.320907
PTTG_03923T0	KOG1487	Puctr	0.414266	0.595353	0.310392
PTTG_12031T0	KOG1541	Puctr	0.386083	0.63689	0.339016
PTTG_02613T0	KOG1643	Puctr	0.473378	0.67447	0.323447
PTTG_07340T0	KOG1885	Puctr	0.420496	0.67447	0.327202
PTTG_05169T0	KOG1889	Puctr	0.386202	0.594364	0.341644
PTTG_03631T0	KOG1979	Puctr	0.381565	0.595353	0.315291
PTTG_03401T0	KOG2509	Puctr	0.38133	0.654691	0.332355
PTTG_06588T0	KOG2519	Puctr	0.381318	0.620077	0.298333
PTTG_07239T0	KOG2535	Puctr	0.368084	0.661614	0.283733
PTTG_08849T0	KOG2775	Puctr	0.421018	0.715017	0.31931
PTTG_02700T0	KOG2971	Puctr	0.40307	0.656669	0.31455
PTTG_08564T0	KOG3022	Puctr	0.442206	0.692271	0.364287
PTTG_25245T0	KOG3974	Puctr	0.381268	0.63689	0.327143
Pucgr_31114	KOG0209	Pucgr	0.410938	0.643866	0.334567
Pucgr_28569	KOG0271	Pucgr	0.386669	0.632953	0.331023
Pucgr_27009	KOG0330	Pucgr	0.389304	0.641881	0.346412
Pucgr_35056	KOG0418	Pucgr	0.405838	0.637913	0.322632
Pucgr_29663	KOG0434	Pucgr	0.417404	0.659739	0.330192
Pucgr_37946	KOG0468	Pucgr	0.403297	0.617079	0.342407
Pucgr_36065	KOG0477	Pucgr	0.412237	0.662715	0.346446
Pucgr_28336	KOG0481	Pucgr	0.392972	0.654778	0.342612
Pucgr_21190	KOG0523	Pucgr	0.461627	0.692478	0.345653
Pucgr_21779	KOG0524	Pucgr	0.371211	0.667676	0.334918
Pucgr_27204	KOG0556	Pucgr	0.421694	0.689502	0.3598
Pucgr_40418	KOG0602	Pucgr	0.436046	0.646842	0.336724
Pucgr_35850	KOG0659	Pucgr	0.360868	0.598229	0.327847
Pucgr_26021	KOG0679	Pucgr	0.522941	0.763908	0.325722
Pucgr_22093	KOG0727	Pucgr	0.408987	0.632953	0.3504
Pucgr_20618	KOG0741	Pucgr	0.393581	0.621047	0.357246
Pucgr_26898	KOG0880	Pucgr	0.4263	0.67462	0.344039
Pucgr_27709	KOG0922	Pucgr	0.365597	0.596245	0.337154
Pucgr_31856	KOG0948	Pucgr	0.418453	0.657755	0.350045
Pucgr_37591	KOG0952	Pucgr	0.434896	0.66966	0.345232
Pucgr_37921	KOG1036	Pucgr	0.413388	0.640889	0.342363
Pucgr_24180	KOG1078	Pucgr	0.418537	0.643866	0.340118
Pucgr_39253	KOG1145	Pucgr	0.391341	0.653786	0.333536
Pucgr_38446	KOG1148	Pucgr	0.413616	0.667676	0.330104
Pucgr_27736	KOG1159	Pucgr	0.406532	0.640889	0.340361
Pucgr_37934	KOG1180	Pucgr	0.413557	0.632953	0.343568
Pucgr_22873	KOG1342	Pucgr	0.383558	0.595253	0.342233
Pucgr_25403	KOG1350	Pucgr	0.504108	0.711328	0.332274
Pucgr_22304	KOG1358	Pucgr	0.415323	0.681565	0.35551
Pucgr_37424	KOG1390	Pucgr	0.459568	0.694462	0.349093
Pucgr_22602	KOG1393	Pucgr	0.452044	0.713312	0.328257
Pucgr_22741	KOG1463	Pucgr	0.413601	0.652794	0.344821
Pucgr_28841	KOG1487	Pucgr	0.399598	0.606166	0.350527
Pucgr_33035	KOG1541	Pucgr	0.404637	0.648826	0.331196
Pucgr_20572	KOG1643	Pucgr	0.464099	0.677597	0.355757
Pucgr_22048	KOG1885	Pucgr	0.436442	0.687517	0.353857
Pucgr_30436	KOG1889	Pucgr	0.389533	0.614103	0.333302
Pucgr_24002	KOG1979	Pucgr	0.392515	0.615095	0.331321
Pucgr_34038	KOG2509	Pucgr	0.396328	0.654778	0.331111
Pucgr_24670	KOG2519	Pucgr	0.380118	0.613111	0.344194
Pucgr_39969	KOG2535	Pucgr	0.365186	0.617079	0.331339
Pucgr_36904	KOG2775	Pucgr	0.412875	0.639897	0.342829
Pucgr_21276	KOG2971	Pucgr	0.430991	0.684541	0.347195
Pucgr_20860	KOG3022	Pucgr	0.380639	0.634937	0.341634
Pucgr_40108	KOG3974	Pucgr	0.380015	0.651802	0.325597
RO3G_11113	KOG0209	Rhior	0.527652	0.6633	0.338046
RO3G_09393	KOG0271	Rhior	0.472001	0.6479	0.321112
RO3G_03956	KOG0330	Rhior	0.851951	0.7194	0.371283
RO3G_16319	KOG0418	Rhior	0.79724	0.7458	0.35023
RO3G_12152	KOG0434	Rhior	2.02737	0.8778	0.423791
RO3G_04367	KOG0468	Rhior	0.326669	0.5896	0.328389
RO3G_02892	KOG0477	Rhior	1.22596	0.7777	0.390491
RO3G_10697	KOG0481	Rhior	0.457239	0.6193	0.347616
RO3G_13066	KOG0523	Rhior	3.03625	0.9383	0.445435
RO3G_14406	KOG0524	Rhior	3.20146	0.9438	0.467309
RO3G_04618	KOG0556	Rhior	1.55769	0.8074	0.429569
RO3G_04014	KOG0602	Rhior	0.478596	0.6545	0.349712
RO3G_16263	KOG0659	Rhior	0.340745	0.6127	0.318025
RO3G_12479	KOG0679	Rhior	0.59643	0.6897	0.339908
RO3G_11702	KOG0727	Rhior	0.662579	0.6952	0.370423
RO3G_16205	KOG0741	Rhior	0.696705	0.6974	0.371246
RO3G_16320	KOG0880	Rhior	1.46286	0.8162	0.408435
RO3G_16035	KOG0922	Rhior	0.289294	0.6028	0.322615
RO3G_00986	KOG0948	Rhior	0.724018	0.7084	0.368679
RO3G_02201	KOG0952	Rhior	0.800261	0.7304	0.380856
RO3G_07346	KOG1036	Rhior	0.492561	0.66	0.32511
RO3G_05582	KOG1078	Rhior	0.682062	0.6996	0.36454
RO3G_12712	KOG1145	Rhior	0.398021	0.5962	0.343696
RO3G_11506	KOG1148	Rhior	1.1	0.7326	0.403705
RO3G_07790	KOG1159	Rhior	0.319388	0.5896	0.323777
RO3G_05461	KOG1180	Rhior	0.474713	0.6457	0.343673
RO3G_03426	KOG1342	Rhior	0.367927	0.6281	0.330002
RO3G_01284	KOG1350	Rhior	3.20163	0.9383	0.459483
RO3G_05589	KOG1358	Rhior	0.616725	0.6996	0.362411
RO3G_14943	KOG1390	Rhior	1.74256	0.8063	0.427251
RO3G_13070	KOG1393	Rhior	1.69819	0.8437	0.41615
RO3G_03190	KOG1463	Rhior	0.592062	0.7084	0.371609
RO3G_15243	KOG1487	Rhior	1.0496	0.7744	0.406555
RO3G_15485	KOG1541	Rhior	0.472772	0.6391	0.338757
RO3G_03047	KOG1643	Rhior	2.71442	0.9163	0.453134
RO3G_13999	KOG1885	Rhior	2.39701	0.8899	0.447365
RO3G_10759	KOG1889	Rhior	0.673871	0.7073	0.349507
RO3G_08797	KOG1979	Rhior	0.215029	0.5731	0.31037
RO3G_06287	KOG2509	Rhior	0.276673	0.5863	0.323809
RO3G_02488	KOG2519	Rhior	0.453356	0.6402	0.339911
RO3G_13887	KOG2535	Rhior	0.655997	0.6666	0.356637
RO3G_03852	KOG2775	Rhior	0.965822	0.7447	0.391338
RO3G_00071	KOG2971	Rhior	0.804339	0.7238	0.354538
RO3G_14582	KOG3022	Rhior	0.208233	0.5346	0.312773
RO3G_02422	KOG3974	Rhior	0.414039	0.6226	0.364787
Rozal1_1870	KOG0209	Rozal	0.355719	0.599069	0.326833
Rozal1_1806	KOG0271	Rozal	0.353488	0.599069	0.30796
Rozal1_3534	KOG0330	Rozal	0.434794	0.653968	0.337017
Rozal1_2494	KOG0418	Rozal	0.474849	0.631816	0.322002
Rozal1_1376	KOG0434	Rozal	0.291468	0.594253	0.336071
Rozal1_3868	KOG0468	Rozal	0.286657	0.582696	0.329125
Rozal1_6	KOG0477	Rozal	0.517997	0.678046	0.347563
Rozal1_3066	KOG0481	Rozal	0.420273	0.635668	0.339576
Rozal1_5037	KOG0523	Rozal	0.431997	0.650115	0.334626
Rozal1_5450	KOG0524	Rozal	0.299097	0.579806	0.335073
Rozal1_4972	KOG0556	Rozal	0.425503	0.631816	0.352541
Rozal1_5078	KOG0602	Rozal	0.387579	0.653968	0.334027
Rozal1_5562	KOG0659	Rozal	0.321743	0.621221	0.307396
Rozal1_2916	KOG0679	Rozal	0.605248	0.692493	0.355501
Rozal1_1500	KOG0727	Rozal	0.407194	0.619295	0.358564
Rozal1_1320	KOG0741	Rozal	0.350291	0.609664	0.324166
Rozal1_4781	KOG0880	Rozal	0.37046	0.599069	0.326959
Rozal1_5445	KOG0922	Rozal	0.481907	0.694419	0.355616
Rozal1_5067	KOG0948	Rozal	0.291889	0.565359	0.330818
Rozal1_1217	KOG0952	Rozal	0.407613	0.648189	0.343896
Rozal1_4179	KOG1036	Rozal	0.502754	0.663599	0.326149
Rozal1_4855	KOG1078	Rozal	0.349437	0.627	0.328035
Rozal1_2235	KOG1145	Rozal	0.367125	0.620258	0.331098
Rozal1_4514	KOG1148	Rozal	0.41913	0.631816	0.347116
Rozal1_1063	KOG1159	Rozal	0.375405	0.622184	0.328333
Rozal1_673	KOG1180	Rozal	0.414072	0.648189	0.340793
Rozal1_3599	KOG1342	Rozal	0.350171	0.600032	0.317498
Rozal1_6096	KOG1350	Rozal	0.453536	0.625074	0.347147
Rozal1_2836	KOG1358	Rozal	0.319012	0.597143	0.309187
Rozal1_3265	KOG1390	Rozal	0.410765	0.627963	0.326255
Rozal1_2736	KOG1393	Rozal	0.39574	0.615442	0.332653
Rozal1_3472	KOG1463	Rozal	0.595599	0.705014	0.363036
Rozal1_4432	KOG1487	Rozal	0.627255	0.731982	0.359299
Rozal1_2594	KOG1541	Rozal	0.475255	0.643373	0.328091
Rozal1_4245	KOG1643	Rozal	0.376908	0.623147	0.318741
Rozal1_2135	KOG1885	Rozal	0.675776	0.723313	0.359659
Rozal1_809	KOG1889	Rozal	0.387356	0.631816	0.332479
Rozal1_330	KOG1979	Rozal	0.400999	0.637594	0.331025
Rozal1_1790	KOG2509	Rozal	0.679076	0.731982	0.364099
Rozal1_5381	KOG2519	Rozal	0.397443	0.613516	0.340148
Rozal1_510	KOG2535	Rozal	0.418824	0.653005	0.32491
Rozal1_5959	KOG2775	Rozal	0.569036	0.681899	0.36545
Rozal1_5803	KOG2971	Rozal	0.498174	0.703088	0.340508
Rozal1_1390	KOG3022	Rozal	0.456155	0.648189	0.319456
Rozal1_5325	KOG3974	Rozal	0.333398	0.59618	0.312992
RSOL_030850T0	KOG0209	Rhiso	0.476585	0.663453	0.354078
RSOL_510090T0	KOG0271	Rhiso	0.364737	0.594192	0.306636
RSOL_183280T0	KOG0330	Rhiso	0.332819	0.58599	0.336835
RSOL_481470T0	KOG0418	Rhiso	0.405367	0.622443	0.339012
RSOL_381430T0	KOG0434	Rhiso	0.360648	0.606039	0.318191
RSOL_431370T0	KOG0468	Rhiso	0.62687	0.773725	0.404704
RSOL_437190T0	KOG0477	Rhiso	0.42735	0.637025	0.351185
RSOL_143560T0	KOG0481	Rhiso	0.419092	0.643404	0.358119
RSOL_476840T0	KOG0523	Rhiso	0.432122	0.68168	0.348541
RSOL_416610T0	KOG0524	Rhiso	0.48486	0.678946	0.364194
RSOL_511180T0	KOG0556	Rhiso	0.46586	0.652517	0.362244
RSOL_497610T0	KOG0602	Rhiso	0.523262	0.719045	0.37546
RSOL_323540T0	KOG0659	Rhiso	0.37963	0.612419	0.326588
RSOL_445420T0	KOG0679	Rhiso	0.395481	0.626089	0.319206
RSOL_494760T0	KOG0727	Rhiso	0.460569	0.656163	0.378059
RSOL_510890T0	KOG0741	Rhiso	0.463436	0.667099	0.356976
RSOL_435830T0	KOG0880	Rhiso	0.561026	0.72269	0.427691
RSOL_218840T0	KOG0922	Rhiso	0.428519	0.653429	0.353231
RSOL_349180T0	KOG0948	Rhiso	0.435437	0.646138	0.36207
RSOL_507440T0	KOG0952	Rhiso	0.463487	0.67439	0.371064
RSOL_015240T0	KOG1036	Rhiso	0.336121	0.596926	0.316593
RSOL_434280T0	KOG1078	Rhiso	0.417605	0.637025	0.343632
RSOL_208080T0	KOG1145	Rhiso	0.396228	0.620621	0.353407
RSOL_510960T0	KOG1148	Rhiso	0.415299	0.645227	0.35021
RSOL_423440T0	KOG1159	Rhiso	0.32124	0.583256	0.321834
RSOL_029630T0	KOG1180	Rhiso	0.49508	0.696262	0.372591
RSOL_499360T0	KOG1342	Rhiso	0.388671	0.633379	0.349061
RSOL_231680T0	KOG1350	Rhiso	0.610174	0.759144	0.398738
RSOL_391210T0	KOG1358	Rhiso	0.514429	0.686237	0.356368
RSOL_445350T0	KOG1390	Rhiso	0.554686	0.718134	0.378065
RSOL_296960T0	KOG1393	Rhiso	0.575674	0.73636	0.388424
RSOL_340280T0	KOG1463	Rhiso	0.42184	0.652517	0.354712
RSOL_478320T0	KOG1487	Rhiso	0.404392	0.614241	0.352598
RSOL_413410T0	KOG1541	Rhiso	0.35257	0.61333	0.342772
RSOL_217400T0	KOG1643	Rhiso	0.49108	0.664365	0.358453
RSOL_438940T0	KOG1885	Rhiso	0.478062	0.694439	0.388481
RSOL_359600T0	KOG1889	Rhiso	0.42649	0.676212	0.347763
RSOL_118600T0	KOG1979	Rhiso	0.37805	0.614241	0.338077
RSOL_389530T0	KOG2509	Rhiso	0.478857	0.677124	0.377144
RSOL_412480T0	KOG2519	Rhiso	0.450297	0.645227	0.369192
RSOL_414100T0	KOG2535	Rhiso	0.330448	0.596015	0.336983
RSOL_189510T0	KOG2775	Rhiso	0.419003	0.637936	0.361355
RSOL_404690T0	KOG2971	Rhiso	0.369426	0.627911	0.333021
RSOL_297130T0	KOG3022	Rhiso	0.403507	0.630645	0.333087
RSOL_075640T0	KOG3974	Rhiso	0.39361	0.614241	0.323495
Spore439	KOG0209	Spore	0.535676	0.768807	0.348544
Spore6567	KOG0271	Spore	0.446999	0.702006	0.341489
Spore5027	KOG0330	Spore	0.471902	0.672707	0.35349
Spore572	KOG0418	Spore	0.41801	0.636376	0.341942
Spore4970	KOG0434	Spore	0.683111	0.869596	0.381673
Spore5843	KOG0468	Spore	0.43367	0.712553	0.327642
Spore4282	KOG0477	Spore	0.614058	0.730133	0.364664
Spore2120	KOG0481	Spore	0.517248	0.720757	0.347608
Spore2018	KOG0523	Spore	0.946702	0.935226	0.421238
Spore4016	KOG0524	Spore	0.89457	0.905927	0.399524
Spore1507	KOG0556	Spore	0.65159	0.844985	0.379849
Spore4297	KOG0602	Spore	0.63395	0.777011	0.400117
Spore1949	KOG0659	Spore	0.415674	0.68677	0.330733
Spore4123	KOG0679	Spore	0.87655	0.881316	0.397907
Spore595	KOG0727	Spore	0.539568	0.678566	0.353638
Spore3331	KOG0741	Spore	0.513327	0.705521	0.358108
Spore3057	KOG0880	Spore	0.595264	0.782871	0.380712
Spore1187	KOG0922	Spore	0.383949	0.655127	0.32785
Spore4332	KOG0948	Spore	0.587112	0.750056	0.369678
Spore981	KOG0952	Spore	0.493777	0.718413	0.342714
Spore1314	KOG1036	Spore	0.292261	0.576606	0.28738
Spore830	KOG1078	Spore	0.628928	0.810998	0.370837
Spore3743	KOG1145	Spore	0.318247	0.587153	0.322286
Spore4935	KOG1148	Spore	0.617455	0.782871	0.381219
Spore2794	KOG1159	Spore	0.249105	0.610593	0.29561
Spore980	KOG1180	Spore	0.703454	0.847329	0.402854
Spore5189	KOG1342	Spore	0.436706	0.735993	0.34067
Spore6169	KOG1350	Spore	0.961414	0.881316	0.41948
Spore6502	KOG1358	Spore	0.565921	0.744196	0.365211
Spore6607	KOG1390	Spore	0.556518	0.795763	0.349982
Spore2779	KOG1393	Spore	0.800462	0.880144	0.411791
Spore5651	KOG1463	Spore	0.522916	0.730133	0.34767
Spore5989	KOG1487	Spore	0.485474	0.738336	0.336474
Spore4396	KOG1541	Spore	0.4123	0.659815	0.355144
Spore6288	KOG1643	Spore	0.705766	0.934054	0.379682
Spore4930	KOG1885	Spore	0.844434	1.00672	0.424821
Spore211	KOG1889	Spore	0.544537	0.807482	0.364465
Spore5020	KOG1979	Spore	0.328951	0.551994	0.331328
Spore6488	KOG2509	Spore	0.303621	0.520351	0.312807
Spore3589	KOG2519	Spore	0.603702	0.822718	0.390526
Spore296	KOG2535	Spore	0.480234	0.639892	0.34801
Spore3947	KOG2775	Spore	0.708242	0.860221	0.398659
Spore4994	KOG2971	Spore	0.636083	0.795763	0.376364
Spore1316	KOG3022	Spore	0.384001	0.672707	0.31846
Spore3525	KOG3974	Spore	0.309794	0.625828	0.311833
Sscle10g075040	KOG0209	Sclsc	0.506252	0.667714	0.347131
Sscle02g017210	KOG0271	Sclsc	0.369702	0.617839	0.326757
Sscle13g093710	KOG0330	Sclsc	0.443194	0.631071	0.342177
Sscle06g052220	KOG0418	Sclsc	0.517796	0.670768	0.348162
Sscle15g103390	KOG0434	Sclsc	0.596344	0.69825	0.370252
Sscle05g041340	KOG0468	Sclsc	0.429389	0.644304	0.341529
Sscle03g022630	KOG0477	Sclsc	0.557163	0.690107	0.363651
Sscle11g084310	KOG0481	Sclsc	0.446413	0.643286	0.333609
Sscle16g108710	KOG0523	Sclsc	1.01535	0.839732	0.404377
Sscle07g059220	KOG0524	Sclsc	0.707266	0.745071	0.377243
Sscle15g105050	KOG0556	Sclsc	0.498486	0.672804	0.356463
Sscle08g063190	KOG0602	Sclsc	0.491726	0.662625	0.351207
Sscle05g045210	KOG0659	Sclsc	0.330009	0.61275	0.316347
Sscle05g044660	KOG0679	Sclsc	0.433832	0.649393	0.341692
Sscle12g091410	KOG0727	Sclsc	0.652596	0.709446	0.359919
Sscle05g041940	KOG0741	Sclsc	0.454549	0.6555	0.349724
Sscle12g087500	KOG0880	Sclsc	0.758993	0.737946	0.400953
Sscle03g022520	KOG0922	Sclsc	0.455071	0.629036	0.326829
Sscle09g072200	KOG0948	Sclsc	0.557453	0.688071	0.361268
Sscle02g021270	KOG0952	Sclsc	0.471221	0.656518	0.345023
Sscle10g077830	KOG1036	Sclsc	0.368489	0.621911	0.319748
Sscle04g035460	KOG1078	Sclsc	0.502468	0.664661	0.356769
Sscle12g091890	KOG1145	Sclsc	0.436158	0.649393	0.34811
Sscle10g080340	KOG1148	Sclsc	0.536981	0.66975	0.360512
Sscle10g078540	KOG1159	Sclsc	0.633792	0.705375	0.372571
Sscle01g002730	KOG1180	Sclsc	0.570601	0.694179	0.363613
Sscle05g046910	KOG1342	Sclsc	0.492929	0.666696	0.354338
Sscle11g083270	KOG1350	Sclsc	0.941941	0.807161	0.393212
Sscle12g089710	KOG1358	Sclsc	0.397841	0.638196	0.338197
Sscle05g041330	KOG1390	Sclsc	0.837019	0.775607	0.399511
Sscle13g096610	KOG1393	Sclsc	0.767005	0.764411	0.39154
Sscle05g047560	KOG1463	Sclsc	0.534531	0.671786	0.339486
Sscle06g052740	KOG1487	Sclsc	0.459664	0.6555	0.336689
Sscle02g018940	KOG1541	Sclsc	0.291357	0.600536	0.332702
Sscle07g059880	KOG1643	Sclsc	0.917579	0.801054	0.413417
Sscle04g032330	KOG1885	Sclsc	0.677864	0.748125	0.3939
Sscle02g020730	KOG1889	Sclsc	0.429987	0.644304	0.33635
Sscle10g078580	KOG1979	Sclsc	0.407711	0.632089	0.326925
Sscle12g087240	KOG2509	Sclsc	0.35873	0.618857	0.312796
Sscle12g087800	KOG2519	Sclsc	0.533873	0.677893	0.351592
Sscle06g048650	KOG2535	Sclsc	0.48943	0.677893	0.343753
Sscle09g070940	KOG2775	Sclsc	0.534234	0.695196	0.376784
Sscle01g003570	KOG2971	Sclsc	0.455749	0.658554	0.345743
Sscle10g078140	KOG3022	Sclsc	0.394509	0.633107	0.327112
Sscle01g006870	KOG3974	Sclsc	0.257899	0.594429	0.319824
Stano11717	KOG0209	Stano	0.604043	0.808722	0.39266
Stano10192	KOG0271	Stano	0.391298	0.606541	0.317251
Stano1840	KOG0330	Stano	0.426546	0.665511	0.367672
Stano2728	KOG0418	Stano	0.512772	0.76299	0.362235
Stano5367	KOG0434	Stano	0.517344	0.749752	0.389429
Stano10913	KOG0468	Stano	0.46495	0.646255	0.359053
Stano9229	KOG0477	Stano	0.5045	0.633017	0.394444
Stano8646	KOG0481	Stano	0.415552	0.619779	0.346269
Stano3498	KOG0523	Stano	0.72383	0.867691	0.408366
Stano2254	KOG0524	Stano	0.597865	0.793077	0.351098
Stano292	KOG0556	Stano	0.524087	0.764194	0.345996
Stano5029	KOG0602	Stano	0.467963	0.685969	0.353172
Stano634	KOG0659	Stano	0.490527	0.777432	0.357968
Stano4683	KOG0679	Stano	0.796271	0.924253	0.450178
Stano5662	KOG0727	Stano	0.535732	0.723276	0.392329
Stano9262	KOG0741	Stano	0.429725	0.628203	0.33521
Stano10374	KOG0880	Stano	0.507255	0.699207	0.411838
Stano2514	KOG0922	Stano	0.326896	0.59571	0.330361
Stano11289	KOG0948	Stano	0.485509	0.677545	0.350581
Stano7270	KOG0952	Stano	0.433132	0.613762	0.344384
Stano2418	KOG1036	Stano	0.457531	0.725683	0.39084
Stano218	KOG1078	Stano	0.541661	0.698004	0.384068
Stano8001	KOG1145	Stano	0.411009	0.625797	0.366958
Stano11723	KOG1148	Stano	0.4229	0.701614	0.377904
Stano6787	KOG1159	Stano	0.39025	0.636628	0.272924
Stano6705	KOG1180	Stano	0.588224	0.79067	0.394823
Stano415	KOG1342	Stano	0.507	0.718463	0.367914
Stano4808	KOG1350	Stano	0.837616	0.865284	0.45981
Stano5504	KOG1358	Stano	0.440715	0.655883	0.380171
Stano12118	KOG1390	Stano	0.454363	0.676342	0.369498
Stano2190	KOG1393	Stano	0.646299	0.842418	0.392609
Stano8223	KOG1463	Stano	0.437526	0.688376	0.382676
Stano5342	KOG1487	Stano	0.474472	0.671528	0.371729
Stano9991	KOG1541	Stano	0.297578	0.669121	0.379345
Stano9572	KOG1643	Stano	0.623544	0.886946	0.4086
Stano3084	KOG1885	Stano	0.6358	0.900184	0.387226
Stano862	KOG1889	Stano	0.446294	0.743735	0.358678
Stano2500	KOG1979	Stano	0.382651	0.580065	0.324291
Stano12197	KOG2509	Stano	0.342201	0.588489	0.331409
Stano8932	KOG2519	Stano	0.516705	0.769008	0.396072
Stano8494	KOG2535	Stano	0.336189	0.670324	0.337501
Stano11055	KOG2775	Stano	0.512423	0.770211	0.426056
Stano2852	KOG2971	Stano	0.461109	0.653476	0.366884
Stano2352	KOG3022	Stano	0.313625	0.640238	0.394383
Stano10497	KOG3974	Stano	0.483285	0.694393	0.375257
Tapde1_3841	KOG0209	Tapde	0.420791	0.628981	0.335979
Tapde1_1944	KOG0271	Tapde	0.302314	0.629972	0.302269
Tapde1_3818	KOG0330	Tapde	0.323159	0.615114	0.333651
Tapde1_2012	KOG0418	Tapde	0.441613	0.672564	0.340011
Tapde1_4002	KOG0434	Tapde	0.460191	0.657706	0.338985
Tapde1_1543	KOG0468	Tapde	0.384988	0.616104	0.334274
Tapde1_3153	KOG0477	Tapde	0.440443	0.640867	0.343734
Tapde1_4260	KOG0481	Tapde	0.410551	0.632943	0.345078
Tapde1_1838	KOG0523	Tapde	0.761742	0.764682	0.356304
Tapde1_2685	KOG0524	Tapde	0.530835	0.720109	0.351924
Tapde1_4350	KOG0556	Tapde	0.391919	0.615114	0.324295
Tapde1_2668	KOG0602	Tapde	0.391904	0.629972	0.335381
Tapde1_598	KOG0659	Tapde	0.361718	0.650773	0.317513
Tapde1_3618	KOG0679	Tapde	0.355472	0.629972	0.337386
Tapde1_384	KOG0727	Tapde	0.389875	0.611152	0.353245
Tapde1_3195	KOG0741	Tapde	0.427971	0.631953	0.344468
Tapde1_2460	KOG0880	Tapde	0.502946	0.66464	0.334449
Tapde1_1636	KOG0922	Tapde	0.361469	0.602237	0.330679
Tapde1_1510	KOG0948	Tapde	0.412003	0.625019	0.338435
Tapde1_3575	KOG0952	Tapde	0.400466	0.624028	0.329501
Tapde1_1781	KOG1036	Tapde	0.397451	0.617095	0.327589
Tapde1_983	KOG1078	Tapde	0.457755	0.644829	0.340332
Tapde1_305	KOG1145	Tapde	0.419771	0.629972	0.346664
Tapde1_2975	KOG1148	Tapde	0.413183	0.630962	0.334279
Tapde1_884	KOG1159	Tapde	0.426314	0.626009	0.328183
Tapde1_98	KOG1180	Tapde	0.503814	0.68346	0.34065
Tapde1_2522	KOG1342	Tapde	0.335725	0.599265	0.317452
Tapde1_275	KOG1350	Tapde	0.645136	0.719118	0.355112
Tapde1_675	KOG1358	Tapde	0.432769	0.644829	0.336871
Tapde1_4583	KOG1390	Tapde	0.596496	0.724071	0.35133
Tapde1_3194	KOG1393	Tapde	0.624727	0.750815	0.332052
Tapde1_1351	KOG1463	Tapde	0.455434	0.642848	0.344504
Tapde1_2246	KOG1487	Tapde	0.41542	0.630962	0.346415
Tapde1_4058	KOG1541	Tapde	0.456859	0.669592	0.329398
Tapde1_750	KOG1643	Tapde	0.672186	0.74091	0.350702
Tapde1_4270	KOG1885	Tapde	0.459391	0.653744	0.351101
Tapde1_1486	KOG1889	Tapde	0.398649	0.647801	0.332343
Tapde1_1685	KOG1979	Tapde	0.339322	0.599265	0.331851
Tapde1_1587	KOG2509	Tapde	0.483371	0.660678	0.347398
Tapde1_339	KOG2519	Tapde	0.434084	0.64681	0.346202
Tapde1_3843	KOG2535	Tapde	0.376876	0.612142	0.329968
Tapde1_4447	KOG2775	Tapde	0.404738	0.630962	0.335018
Tapde1_3569	KOG2971	Tapde	0.368342	0.641858	0.346933
Tapde1_4059	KOG3022	Tapde	0.356599	0.647801	0.325569
Tapde1_3794	KOG3974	Tapde	0.418262	0.674545	0.339679
Verda_9657635.1	KOG0209	Verda	0.67956	0.812308	0.395106
Verda_9653507.1	KOG0271	Verda	0.465953	0.809769	0.339649
Verda_9653661.1	KOG0330	Verda	0.514317	0.713308	0.385851
Verda_9654353.1	KOG0418	Verda	0.501294	0.866885	0.365703
Verda_9652983.1	KOG0434	Verda	0.603425	0.745038	0.372135
Verda_9659752.1	KOG0468	Verda	0.412986	0.567346	0.349766
Verda_9650379.1	KOG0477	Verda	0.515669	0.756462	0.367119
Verda_9652834.1	KOG0481	Verda	0.426603	0.615577	0.337424
Verda_9651628.1	KOG0523	Verda	0.783327	0.887192	0.40535
Verda_9650461.1	KOG0524	Verda	0.550035	0.781846	0.337479
Verda_9657830.1	KOG0556	Verda	0.544545	0.765346	0.375128
Verda_9652925.1	KOG0602	Verda	0.413442	0.618115	0.355187
Verda_9652388.1	KOG0659	Verda	0.721081	0.8415	0.378248
Verda_9649827.1	KOG0679	Verda	0.578757	0.755192	0.368746
Verda_9654352.1	KOG0727	Verda	0.573627	0.695538	0.376567
Verda_9659744.1	KOG0741	Verda	0.525975	0.5775	0.3816
Verda_9651472.1	KOG0880	Verda	0.773613	0.959538	0.409272
Verda_9649780.1	KOG0922	Verda	0.289915	0.482308	0.315693
Verda_9657670.1	KOG0948	Verda	0.455853	0.623192	0.352959
Verda_9656753.1	KOG0952	Verda	0.423475	0.621923	0.341141
Verda_9657960.1	KOG1036	Verda	0.482621	0.699346	0.354694
Verda_9653213.1	KOG1078	Verda	0.582558	0.856731	0.367587
Verda_9658440.1	KOG1145	Verda	0.408677	0.770423	0.337313
Verda_9657511.1	KOG1148	Verda	0.482291	0.66	0.385022
Verda_9659892.1	KOG1159	Verda	0.700746	0.833885	0.403978
Verda_9651778.1	KOG1180	Verda	0.661476	0.910038	0.38682
Verda_9659014.1	KOG1342	Verda	0.573505	0.719654	0.387813
Verda_9650242.1	KOG1350	Verda	0.685599	0.858	0.386432
Verda_9658552.1	KOG1358	Verda	0.703508	0.9075	0.374257
Verda_9656825.1	KOG1390	Verda	0.440212	0.644769	0.340763
Verda_9651355.1	KOG1393	Verda	0.753862	0.903692	0.397492
Verda_9655942.1	KOG1463	Verda	0.634522	0.911308	0.357652
Verda_9660190.1	KOG1487	Verda	0.464596	0.786923	0.35697
Verda_9653513.1	KOG1541	Verda	0.611755	0.963346	0.38131
Verda_9655634.1	KOG1643	Verda	0.350149	0.696808	0.333043
Verda_9650425.1	KOG1885	Verda	0.687185	0.959538	0.40248
Verda_9659586.1	KOG1889	Verda	0.576496	0.757731	0.379297
Verda_9659881.1	KOG1979	Verda	0.346677	0.583846	0.32202
Verda_9654148.1	KOG2509	Verda	0.36282	0.536885	0.312204
Verda_9651211.1	KOG2519	Verda	0.461686	0.713308	0.374239
Verda_9654355.1	KOG2535	Verda	0.377837	0.700615	0.32427
Verda_9652147.1	KOG2775	Verda	0.327322	0.500077	0.338786
Verda_9649773.1	KOG2971	Verda	0.561783	0.925269	0.374506
Verda_9652075.1	KOG3022	Verda	0.537819	0.927808	0.36001
Verda_9659815.1	KOG3974	Verda	0.347719	0.486115	0.328267
Wolco_152098	KOG0209	Wolco	0.505031	0.799096	0.363965
Wolco_123796	KOG0271	Wolco	0.349548	0.597404	0.320666
Wolco_136207	KOG0330	Wolco	0.349074	0.573288	0.334288
Wolco_137038	KOG0418	Wolco	0.470818	0.671942	0.355997
Wolco_26176	KOG0434	Wolco	0.51788	0.794712	0.372566
Wolco_135645	KOG0468	Wolco	0.453665	0.679615	0.359141
Wolco_138858	KOG0477	Wolco	0.436932	0.668654	0.356769
Wolco_93516	KOG0481	Wolco	0.391641	0.583154	0.332183
Wolco_23453	KOG0523	Wolco	0.549906	0.807865	0.381997
Wolco_71330	KOG0524	Wolco	0.550599	0.791423	0.383698
Wolco_22255	KOG0556	Wolco	0.515024	0.736615	0.377381
Wolco_137840	KOG0602	Wolco	0.439461	0.680712	0.356158
Wolco_104973	KOG0659	Wolco	0.464764	0.691673	0.344997
Wolco_25068	KOG0679	Wolco	0.66042	0.880212	0.394584
Wolco_136148	KOG0727	Wolco	0.491036	0.682904	0.362642
Wolco_70899	KOG0741	Wolco	0.461769	0.703731	0.367202
Wolco_26210	KOG0880	Wolco	0.52662	0.777173	0.417463
Wolco_21674	KOG0922	Wolco	0.347899	0.564519	0.318094
Wolco_92628	KOG0948	Wolco	0.442716	0.674135	0.359281
Wolco_2707	KOG0952	Wolco	0.472262	0.679615	0.362643
Wolco_133839	KOG1036	Wolco	0.465569	0.724558	0.347403
Wolco_135637	KOG1078	Wolco	0.419738	0.652212	0.344136
Wolco_96718	KOG1145	Wolco	0.430923	0.647827	0.360934
Wolco_70583	KOG1148	Wolco	0.453591	0.693865	0.360383
Wolco_102870	KOG1159	Wolco	0.364865	0.566712	0.322502
Wolco_25940	KOG1180	Wolco	0.492082	0.794712	0.386449
Wolco_111898	KOG1342	Wolco	0.356708	0.553558	0.332853
Wolco_22973	KOG1350	Wolco	0.60407	0.778269	0.403488
Wolco_140755	KOG1358	Wolco	0.440205	0.675231	0.351474
Wolco_2470	KOG1390	Wolco	0.56119	0.804577	0.398614
Wolco_2860	KOG1393	Wolco	0.590985	0.901038	0.398144
Wolco_135903	KOG1463	Wolco	0.461655	0.709212	0.362497
Wolco_24767	KOG1487	Wolco	0.370288	0.561231	0.332707
Wolco_11516	KOG1541	Wolco	0.444271	0.674135	0.363005
Wolco_29033	KOG1643	Wolco	0.531512	0.800192	0.380313
Wolco_28376	KOG1885	Wolco	0.52344	0.735519	0.386648
Wolco_129872	KOG1889	Wolco	0.384856	0.663173	0.346067
Wolco_124444	KOG1979	Wolco	0.340913	0.523962	0.297648
Wolco_140782	KOG2509	Wolco	0.515725	0.743192	0.366927
Wolco_116986	KOG2519	Wolco	0.389053	0.567808	0.330176
Wolco_136072	KOG2535	Wolco	0.372733	0.595212	0.339239
Wolco_135674	KOG2775	Wolco	0.4412	0.734423	0.389943
Wolco_135972	KOG2971	Wolco	0.348431	0.554654	0.32679
Wolco_77448	KOG3022	Wolco	0.421325	0.676327	0.342502
Wolco_140469	KOG3974	Wolco	0.437041	0.771692	0.376035
