# Supplementary material for: Codon optimization underpins generalist parasitism in fungi
Source: eLife. 2017 Feb 3;6:e22472. doi: 10.7554/eLife.22472 (PMC5315462; doi:10.7554/eLife.22472)
Supplement: Figure 5—source data 5. — DOI: http://dx.doi.org/10.7554/eLife.22472.022 [file elife-22472-fig5-data5.xlsx]

## Sheet: Sheet1
Figure 5 - source data 5. Distribution of tRNA adaptation indices per Gene Ontology in generalist and specialist genomes
GO identifier	GO description	Total gene count	Generalists gene count	Specialists gene count	Total secreted gene count	Total secreted %	Average normalized tAI Generalists	Average normalized tAI Specialists	Delta Generalist-Specialist	Over 10% delta?
GO:0006412	translation	7328	2405	1899	205	2.8	0.763281	0.601183	0.162099	YES
GO:0003700	transcription factor activity, sequence-specific DNA binding	6213	2281	1151	91	1.5	0.344064	0.464189	-0.120124	YES
GO:0003735	structural constituent of ribosome	5315	1861	1441	121	2.3	0.797247	0.625817	0.17143	YES
GO:0005840	ribosome	5155	1804	1383	115	2.2	0.802802	0.627504	0.175298	YES
GO:0006350		2915	1014	474	46	1.6	0.358751	0.476656	-0.117905	YES
GO:0006457	protein folding	1933	618	551	194	10	0.748097	0.644831	0.103266	YES
GO:0003924	GTPase activity	1774	532	565	24	1.4	0.691959	0.587046	0.104913	YES
GO:0004339	glucan 1,4-alpha-glucosidase activity	1675	349	441	160	9.6	0.392573	0.504102	-0.111529	YES
GO:0015031	protein transport	1578	473	409	25	1.6	0.620746	0.517626	0.10312	YES
GO:0003899	DNA-directed RNA polymerase activity	1489	461	383	74	5	0.670095	0.55795	0.112145	YES
GO:0008766	UDP-N-acetylmuramoylalanyl-D-glutamyl-2,6-diaminopimelate-D-alanyl-D-alanine ligase activity	1405	286	328	63	4.5	0.382427	0.528329	-0.145903	YES
GO:0018169	ribosomal S6-glutamic acid ligase activity	1405	286	328	63	4.5	0.382427	0.528329	-0.145903	YES
GO:0005351	sugar:proton symporter activity	1384	475	275	89	6.4	0.645432	0.531705	0.113726	YES
GO:0008643	carbohydrate transport	1270	434	239	85	6.7	0.658336	0.525331	0.133006	YES
GO:0008733	L-arabinose isomerase activity	1256	431	230	74	5.9	0.677097	0.543226	0.133871	YES
GO:0051082	unfolded protein binding	1206	366	335	108	9	0.753699	0.631331	0.122368	YES
GO:0016469	proton-transporting two-sector ATPase complex	1159	309	263	43	3.7	0.709256	0.540407	0.168849	YES
GO:0034062	RNA polymerase activity	1155	282	276	73	6.3	0.662777	0.522638	0.140139	YES
GO:0009055	electron carrier activity	1143	385	276	83	7.3	0.692314	0.56479	0.127524	YES
GO:0008565	protein transporter activity	968	291	256	13	1.3	0.679546	0.523594	0.155953	YES
GO:0004298	threonine-type endopeptidase activity	940	304	251	8	0.9	0.755872	0.587446	0.168425	YES
GO:0046914	transition metal ion binding	912	246	212	60	6.6	0.626264	0.504934	0.12133	YES
GO:0046961	proton-transporting ATPase activity, rotational mechanism	907	261	208	28	3.1	0.852529	0.583183	0.269346	YES
GO:0046933	proton-transporting ATP synthase activity, rotational mechanism	904	263	213	24	2.7	0.858741	0.600653	0.258089	YES
GO:0003743	translation initiation factor activity	885	299	274	15	1.7	0.779756	0.633471	0.146285	YES
GO:0005743	mitochondrial inner membrane	882	275	230	16	1.8	0.627393	0.499004	0.128388	YES
GO:0006520	cellular amino acid metabolic process	881	289	215	21	2.4	0.714495	0.552907	0.161588	YES
GO:0051536	iron-sulfur cluster binding	772	290	196	21	2.7	0.666076	0.562551	0.103525	YES
GO:0051341	regulation of oxidoreductase activity	771	215	169	46	6	0.651712	0.538888	0.112824	YES
GO:0016627	oxidoreductase activity, acting on the CH-CH group of donors	751	258	223	9	1.2	0.617705	0.509798	0.107907	YES
GO:0045259	proton-transporting ATP synthase complex	750	222	160	21	2.8	0.876099	0.566044	0.310055	YES
GO:0045454	cell redox homeostasis	749	272	201	162	21.6	0.714632	0.590587	0.124045	YES
GO:0015986	ATP synthesis coupled proton transport	732	236	194	15	2	0.880335	0.652845	0.227489	YES
GO:0006413	translational initiation	694	232	200	10	1.4	0.778621	0.62545	0.153171	YES
GO:0006979	response to oxidative stress	693	234	188	128	18.5	0.667333	0.563883	0.10345	YES
GO:0004803	transposase activity	674	632	25	0	0	0.384669	0.64236	-0.257691	YES
GO:0005783	endoplasmic reticulum	673	249	181	234	34.8	0.691149	0.525365	0.165784	YES
GO:0004448	isocitrate dehydrogenase activity	648	160	131	12	1.9	0.731881	0.535031	0.196851	YES
GO:0005198	structural molecule activity	642	207	161	14	2.2	0.688768	0.571944	0.116824	YES
GO:0006096	glycolytic process	640	197	161	11	1.7	0.808041	0.640466	0.167575	YES
GO:0000160		626	248	168	8	1.3	0.404774	0.509393	-0.104619	YES
GO:0030529	ribonucleoprotein complex	624	172	153	4	0.6	0.77336	0.641464	0.131896	YES
GO:0015662	ATPase activity, coupled to transmembrane movement of ions, phosphorylative mechanism	621	192	128	12	1.9	0.654141	0.545266	0.108875	YES
GO:0000252	C-3 sterol dehydrogenase (C-4 sterol decarboxylase) activity	619	148	125	16	2.6	0.675926	0.541824	0.134102	YES
GO:0005839	proteasome core complex	618	211	178	6	1	0.76364	0.600882	0.162758	YES
GO:0008875	gluconate dehydrogenase activity	611	148	123	13	2.1	0.682358	0.541325	0.141033	YES
GO:0006364	rRNA processing	605	201	172	6	1	0.709637	0.603663	0.105974	YES
GO:0005643	nuclear pore	601	184	162	9	1.5	0.640918	0.488914	0.152005	YES
GO:0000253		580	137	116	11	1.9	0.67938	0.540414	0.138966	YES
GO:0006913	nucleocytoplasmic transport	568	141	197	5	0.9	0.681099	0.575533	0.105566	YES
GO:0051990	(R)-2-hydroxyglutarate dehydrogenase activity	563	134	115	11	2	0.686425	0.542339	0.144086	YES
GO:0016229	steroid dehydrogenase activity	561	132	115	11	2	0.684826	0.542339	0.142487	YES
GO:0008654	phospholipid biosynthetic process	561	187	157	22	3.9	0.569604	0.465987	0.103617	YES
GO:0006334	nucleosome assembly	553	144	167	10	1.8	0.820778	0.648862	0.171916	YES
GO:0000786	nucleosome	528	140	173	10	1.9	0.785971	0.653861	0.13211	YES
GO:0005739	mitochondrion	520	180	158	4	0.8	0.715383	0.525513	0.189871	YES
GO:0016071	mRNA metabolic process	491	140	113	3	0.6	0.719764	0.591195	0.12857	YES
GO:0003995	acyl-CoA dehydrogenase activity	486	163	135	4	0.8	0.66135	0.545341	0.116009	YES
GO:0008170	N-methyltransferase activity	469	120	107	11	2.3	0.598908	0.493467	0.105441	YES
GO:0006310	DNA recombination	456	166	137	4	0.9	0.445867	0.550161	-0.104293	YES
GO:0016769	transferase activity, transferring nitrogenous groups	452	145	89	10	2.2	0.660552	0.496809	0.163743	YES
GO:0008299	isoprenoid biosynthetic process	450	144	125	9	2	0.681757	0.550056	0.131701	YES
GO:0042254	ribosome biogenesis	421	147	141	3	0.7	0.844884	0.657128	0.187757	YES
GO:0000156		419	128	98	6	1.4	0.391789	0.510592	-0.118803	YES
GO:0008276	protein methyltransferase activity	407	107	91	4	1	0.588626	0.487418	0.101209	YES
GO:0008649	rRNA methyltransferase activity	406	106	94	4	1	0.616915	0.515457	0.101458	YES
GO:0015935	small ribosomal subunit	398	127	120	4	1	0.896898	0.692458	0.204439	YES
GO:0000179		397	103	89	4	1	0.60735	0.496315	0.111035	YES
GO:0016433	rRNA (adenine) methyltransferase activity	393	103	89	4	1	0.607291	0.478506	0.128786	YES
GO:0004185	serine-type carboxypeptidase activity	391	129	134	255	65.2	0.642078	0.540045	0.102033	YES
GO:0004175	endopeptidase activity	388	119	131	3	0.8	0.783017	0.631053	0.151963	YES
GO:0008175	tRNA methyltransferase activity	388	100	88	4	1	0.6123	0.496795	0.115505	YES
GO:0016274	protein-arginine N-methyltransferase activity	387	101	86	4	1	0.610802	0.506314	0.104488	YES
GO:0008174	mRNA methyltransferase activity	385	99	85	4	1	0.611929	0.500329	0.1116	YES
GO:0016279	protein-lysine N-methyltransferase activity	384	99	85	4	1	0.611929	0.494012	0.117918	YES
GO:0004540	ribonuclease activity	383	94	166	129	33.7	0.532894	0.393024	0.13987	YES
GO:0008169	C-methyltransferase activity	383	99	84	4	1	0.611929	0.496679	0.115251	YES
GO:0006099	tricarboxylic acid cycle	375	116	118	5	1.3	0.858716	0.640661	0.218055	YES
GO:0030248	cellulose binding	375	180	22	316	84.3	0.678206	0.807364	-0.129158	YES
GO:0008137	NADH dehydrogenase (ubiquinone) activity	374	110	91	9	2.4	0.7589	0.534758	0.224142	YES
GO:0008812	choline dehydrogenase activity	374	83	87	162	43.3	0.721988	0.506644	0.215344	YES
GO:0005097		371	117	73	7	1.9	0.328393	0.44174	-0.113347	YES
GO:0032313		371	117	73	7	1.9	0.328393	0.44174	-0.113347	YES
GO:0008483	transaminase activity	368	144	87	6	1.6	0.6925	0.555345	0.137155	YES
GO:0004364	glutathione transferase activity	366	88	100	4	1.1	0.76442	0.51275	0.25167	YES
GO:0015035	protein disulfide oxidoreductase activity	365	124	102	13	3.6	0.703177	0.552412	0.150766	YES
GO:0009116	nucleoside metabolic process	356	137	87	13	3.7	0.678628	0.554299	0.124329	YES
GO:0044267	cellular protein metabolic process	353	90	86	4	1.1	0.8213	0.572442	0.248858	YES
GO:0006633	fatty acid biosynthetic process	348	119	108	4	1.1	0.646529	0.532963	0.113566	YES
GO:0004523	RNA-DNA hybrid ribonuclease activity	344	131	90	1	0.3	0.265198	0.428856	-0.163657	YES
GO:0015934	large ribosomal subunit	340	108	107	6	1.8	0.786417	0.597664	0.188753	YES
GO:0006414	translational elongation	331	110	94	17	5.1	0.945045	0.738809	0.206237	YES
GO:0008235	metalloexopeptidase activity	328	91	85	8	2.4	0.69144	0.556188	0.135251	YES
GO:0004129	cytochrome-c oxidase activity	319	112	91	4	1.3	0.867527	0.554538	0.312988	YES
GO:0006066	alcohol metabolic process	316	61	65	125	39.6	0.707016	0.498554	0.208463	YES
GO:0006270	DNA replication initiation	316	85	105	3	0.9	0.680976	0.580829	0.100148	YES
GO:0030163	protein catabolic process	309	91	99	7	2.3	0.799132	0.666495	0.132637	YES
GO:0008422	beta-glucosidase activity	302	89	58	128	42.4	0.667843	0.56519	0.102653	YES
GO:0008843	endochitinase activity	297	77	75	142	47.8	0.594688	0.481467	0.113222	YES
GO:0016853	isomerase activity	295	101	88	103	34.9	0.789871	0.624955	0.164917	YES
GO:0005618	cell wall	290	107	67	225	77.6	0.718421	0.57191	0.14651	YES
GO:0007017	microtubule-based process	284	85	79	7	2.5	0.752788	0.627278	0.12551	YES
GO:0004499	N,N-dimethylaniline monooxygenase activity	279	110	70	15	5.4	0.431291	0.535329	-0.104038	YES
GO:0005874	microtubule	273	75	77	6	2.2	0.774627	0.643532	0.131094	YES
GO:0016651	oxidoreductase activity, acting on NAD(P)H	272	93	72	5	1.8	0.819462	0.583875	0.235587	YES
GO:0000059	protein import into nucleus, docking	272	79	65	5	1.8	0.688392	0.501062	0.187331	YES
GO:0009396	folic acid-containing compound biosynthetic process	266	88	73	4	1.5	0.584455	0.480836	0.103619	YES
GO:0016597	amino acid binding	264	100	65	4	1.5	0.72692	0.505031	0.221889	YES
GO:0003746	translation elongation factor activity	264	89	77	3	1.1	0.91136	0.704792	0.206567	YES
GO:0006801	superoxide metabolic process	261	83	82	61	23.4	0.72053	0.605012	0.115518	YES
GO:0003954	NADH dehydrogenase activity	259	80	52	13	5	0.699362	0.581615	0.117747	YES
GO:0008121	ubiquinol-cytochrome-c reductase activity	258	84	63	6	2.3	0.900202	0.641873	0.258329	YES
GO:0071949	FAD binding	254	138	116	18	7.1	0.463536	0.564974	-0.101438	YES
GO:0003333	amino acid transmembrane transport	253	132	121	2	0.8	0.388629	0.51405	-0.125421	YES
GO:0030976	thiamine pyrophosphate binding	250	81	70	2	0.8	0.676765	0.4855	0.191265	YES
GO:0006098	pentose-phosphate shunt	250	81	68	2	0.8	0.73237	0.610059	0.122312	YES
GO:0008800	beta-lactamase activity	249	84	37	56	22.5	0.455012	0.558649	-0.103637	YES
GO:0008652	cellular amino acid biosynthetic process	247	85	57	1	0.4	0.773741	0.596474	0.177267	YES
GO:0030655	beta-lactam antibiotic catabolic process	240	82	36	55	22.9	0.456695	0.566972	-0.110277	YES
GO:0016298	lipase activity	237	76	47	31	13.1	0.414961	0.577468	-0.162508	YES
GO:0004090	carbonyl reductase (NADPH) activity	236	68	64	5	2.1	0.657324	0.488016	0.169308	YES
GO:0046912	transferase activity, transferring acyl groups, acyl groups converted into alkyl on transfer	229	70	69	2	0.9	0.828729	0.624928	0.203801	YES
GO:0004029	aldehyde dehydrogenase (NAD) activity	215	70	40	0	0	0.728543	0.591975	0.136568	YES
GO:0004096	catalase activity	213	84	53	42	19.7	0.722952	0.571736	0.151217	YES
GO:0016846	carbon-sulfur lyase activity	210	85	48	3	1.4	0.484812	0.591792	-0.10698	YES
GO:0015645	fatty acid ligase activity	209	64	41	7	3.3	0.633172	0.514683	0.118489	YES
GO:0018732	sulfolactone hydrolase activity	207	68	41	25	12.1	0.402059	0.553951	-0.151892	YES
GO:0016717	oxidoreductase activity, acting on paired donors, with oxidation of a pair of donors resulting in the reduction of molecular oxygen to two molecules of water	206	58	48	1	0.5	0.676569	0.527062	0.149506	YES
GO:0004338	glucan exo-1,3-beta-glucosidase activity	201	48	52	97	48.3	0.700917	0.506712	0.194205	YES
GO:0005741	mitochondrial outer membrane	201	73	55	2	1	0.747384	0.6032	0.144184	YES
GO:0003824	catalytic activity	24563	7675	6042	2098	8.5	0.590698	0.546825	0.0438731	no
GO:0008152	metabolic process	23918	7756	5395	1103	4.6	0.592111	0.540808	0.0513032	no
GO:0005524	ATP binding	23079	7828	6232	570	2.5	0.568114	0.540286	0.0278283	no
GO:0008270	zinc ion binding	19488	6865	4894	650	3.3	0.404584	0.489429	-0.0848456	no
GO:0005515	protein binding	16960	6712	5446	565	3.3	0.495219	0.502531	-0.0073125	no
GO:0005634	nucleus	16828	6673	3579	246	1.5	0.418173	0.504747	-0.0865736	no
GO:0016021	integral component of membrane	16080	6413	3933	995	6.2	0.507669	0.474977	0.0326915	no
GO:0016491	oxidoreductase activity	16073	5594	4132	1415	8.8	0.598849	0.565841	0.0330088	no
GO:0003676	nucleic acid binding	15199	5054	4420	281	1.8	0.53427	0.525391	0.00887956	no
GO:0005488	binding	13984	3871	3189	343	2.5	0.58711	0.519668	0.0674422	no
GO:0005622	intracellular	13798	4247	3358	258	1.9	0.613353	0.550448	0.0629058	no
GO:0016020	membrane	13794	4705	3491	872	6.3	0.559839	0.504906	0.054933	no
GO:0003677	DNA binding	13096	5442	2977	204	1.6	0.439346	0.514269	-0.0749229	no
GO:0006810	transport	11654	3941	2504	551	4.7	0.553372	0.516893	0.0364792	no
GO:0006355	regulation of transcription, DNA-templated	9421	3791	2047	126	1.3	0.363848	0.457357	-0.0935091	no
GO:0005215	transporter activity	7124	2375	1562	335	4.7	0.546119	0.520019	0.0261002	no
GO:0006508	proteolysis	7013	2442	1755	1952	27.8	0.581727	0.548032	0.0336948	no
GO:0006468	protein phosphorylation	6615	2303	1725	119	1.8	0.458851	0.486372	-0.0275205	no
GO:0005975	carbohydrate metabolic process	6529	2520	1596	2780	42.6	0.626379	0.588716	0.0376632	no
GO:0055114	oxidation-reduction process	6303	3599	2410	678	10.8	0.56126	0.5877	-0.0264409	no
GO:0000166		6209	1955	1732	196	3.2	0.628056	0.565221	0.0628346	no
GO:0004672	protein kinase activity	6166	2189	1608	108	1.8	0.458708	0.482904	-0.0241961	no
GO:0005737	cytoplasm	5680	1825	1594	184	3.2	0.663536	0.568811	0.0947259	no
GO:0016787	hydrolase activity	5549	2103	1310	606	10.9	0.532867	0.545596	-0.0127289	no
GO:0020037	heme binding	5252	1732	1432	591	11.3	0.524306	0.495902	0.0284045	no
GO:0005506	iron ion binding	4943	1639	1326	560	11.3	0.501313	0.493282	0.00803095	no
GO:0003723	RNA binding	4270	1746	1090	214	5	0.588017	0.560925	0.0270924	no
GO:0004674	protein serine/threonine kinase activity	4166	1200	970	57	1.4	0.462107	0.484396	-0.0222892	no
GO:0016887	ATPase activity	4154	1399	1015	148	3.6	0.594219	0.541609	0.0526106	no
GO:0005525	GTP binding	3912	1349	1061	83	2.1	0.645102	0.575018	0.0700836	no
GO:0055085	transmembrane transport	3878	2388	1302	62	1.6	0.461284	0.474966	-0.0136827	no
GO:0004553	hydrolase activity, hydrolyzing O-glycosyl compounds	3770	1456	874	1914	50.8	0.614621	0.581017	0.0336037	no
GO:0050660	flavin adenine dinucleotide binding	3460	1242	856	808	23.4	0.569414	0.556895	0.012519	no
GO:0004713	protein tyrosine kinase activity	3218	957	721	47	1.5	0.461209	0.464076	-0.0028673	no
GO:0046872	metal ion binding	3110	1458	932	207	6.7	0.535379	0.532589	0.00278955	no
GO:0042626	ATPase activity, coupled to transmembrane movement of substances	3056	1006	728	96	3.1	0.584018	0.522352	0.0616662	no
GO:0017111	nucleoside-triphosphatase activity	3054	884	655	98	3.2	0.591957	0.52426	0.0676975	no
GO:0006886	intracellular protein transport	3050	967	886	63	2.1	0.621729	0.540043	0.0816862	no
GO:0004497	monooxygenase activity	3045	771	685	377	12.4	0.501462	0.472507	0.0289552	no
GO:0008026	ATP-dependent helicase activity	3026	787	812	49	1.6	0.614677	0.542068	0.0726095	no
GO:0007165	signal transduction	2747	908	803	49	1.8	0.496959	0.513027	-0.0160681	no
GO:0004386	helicase activity	2570	672	715	39	1.5	0.593384	0.540569	0.0528147	no
GO:0005509	calcium ion binding	2409	817	598	286	11.9	0.574666	0.555781	0.0188849	no
GO:0043565	sequence-specific DNA binding	2400	904	573	23	1	0.457489	0.481991	-0.0245023	no
GO:0009058	biosynthetic process	2017	732	500	76	3.8	0.611365	0.52003	0.0913348	no
GO:0030170	pyridoxal phosphate binding	1998	743	471	35	1.8	0.636908	0.544677	0.0922312	no
GO:0004003	ATP-dependent DNA helicase activity	1949	534	521	40	2.1	0.588287	0.536115	0.0521714	no
GO:0006281	DNA repair	1933	643	584	28	1.4	0.431347	0.518567	-0.08722	no
GO:0008168	methyltransferase activity	1920	778	484	46	2.4	0.4986	0.503558	-0.00495759	no
GO:0008094	DNA-dependent ATPase activity	1821	484	485	38	2.1	0.608928	0.537087	0.0718411	no
GO:0007264	small GTPase mediated signal transduction	1821	652	492	41	2.3	0.560801	0.527837	0.0329632	no
GO:0004812	aminoacyl-tRNA ligase activity	1756	567	457	84	4.8	0.641481	0.551186	0.0902955	no
GO:0004004	ATP-dependent RNA helicase activity	1697	449	447	36	2.1	0.621394	0.5426	0.0787947	no
GO:0042623	ATPase activity, coupled	1694	446	448	36	2.1	0.618556	0.538422	0.0801342	no
GO:0042624	ATPase activity, uncoupled	1686	443	443	36	2.1	0.619865	0.540124	0.0797404	no
GO:0042625	ATPase activity, coupled to transmembrane movement of ions	1686	443	443	36	2.1	0.619865	0.540124	0.0797404	no
GO:0008186	RNA-dependent ATPase activity	1686	443	443	36	2.1	0.619865	0.540124	0.0797404	no
GO:0017116	single-stranded DNA-dependent ATP-dependent DNA helicase activity	1686	443	443	36	2.1	0.619865	0.540124	0.0797404	no
GO:0015462	protein-transmembrane transporting ATPase activity	1686	443	443	36	2.1	0.619865	0.540124	0.0797404	no
GO:0006418	tRNA aminoacylation for protein translation	1670	539	435	81	4.9	0.650579	0.555432	0.0951467	no
GO:0016192	vesicle-mediated transport	1647	536	477	15	0.9	0.583054	0.529893	0.053161	no
GO:0006511	ubiquitin-dependent protein catabolic process	1623	510	466	27	1.7	0.583504	0.541979	0.0415254	no
GO:0006629	lipid metabolic process	1519	546	397	282	18.6	0.476412	0.47997	-0.00355768	no
GO:0016462	pyrophosphatase activity	1478	360	367	21	1.4	0.564994	0.543499	0.0214958	no
GO:0008080	N-acetyltransferase activity	1478	577	320	14	0.9	0.47044	0.474544	-0.00410354	no
GO:0043141	ATP-dependent 5'-3' DNA helicase activity	1462	355	363	19	1.3	0.56891	0.546408	0.0225021	no
GO:0008413	8-oxo-7,8-dihydroguanosine triphosphate pyrophosphatase activity	1453	352	355	19	1.3	0.566395	0.543586	0.022809	no
GO:0000810	diacylglycerol diphosphate phosphatase activity	1447	349	354	19	1.3	0.565089	0.542607	0.0224815	no
GO:0019176	dihydroneopterin monophosphate phosphatase activity	1447	349	354	19	1.3	0.565089	0.542607	0.0224815	no
GO:0008796	bis(5'-nucleosyl)-tetraphosphatase activity	1447	349	354	19	1.3	0.565089	0.542607	0.0224815	no
GO:0008758	UDP-2,3-diacylglucosamine hydrolase activity	1447	349	354	19	1.3	0.565089	0.542607	0.0224815	no
GO:0004787	thiamine-pyrophosphatase activity	1447	349	354	19	1.3	0.565089	0.542607	0.0224815	no
GO:0008828	dATP pyrophosphohydrolase activity	1447	349	354	19	1.3	0.565089	0.542607	0.0224815	no
GO:0019177	dihydroneopterin triphosphate pyrophosphohydrolase activity	1447	349	354	19	1.3	0.565089	0.542607	0.0224815	no
GO:0046983	protein dimerization activity	1420	542	264	45	3.2	0.510852	0.534773	-0.0239203	no
GO:0015074	DNA integration	1389	1083	232	7	0.5	0.417048	0.365841	0.0512075	no
GO:0004842	ubiquitin-protein transferase activity	1385	416	365	23	1.7	0.526704	0.508447	0.0182578	no
GO:0005576	extracellular region	1380	688	226	760	55.1	0.597334	0.586907	0.0104272	no
GO:0004698	calcium-dependent protein kinase C activity	1372	396	333	44	3.2	0.445545	0.484646	-0.0391002	no
GO:0004675	transmembrane receptor protein serine/threonine kinase activity	1349	397	326	44	3.3	0.444504	0.483963	-0.0394594	no
GO:0004694	eukaryotic translation initiation factor 2alpha kinase activity	1340	385	329	44	3.3	0.440551	0.485134	-0.0445831	no
GO:0004677	DNA-dependent protein kinase activity	1339	385	327	44	3.3	0.440478	0.484263	-0.0437851	no
GO:0008339		1336	384	326	44	3.3	0.440336	0.483963	-0.0436273	no
GO:0008349	MAP kinase kinase kinase kinase activity	1336	384	326	44	3.3	0.440336	0.483963	-0.0436273	no
GO:0019912	cyclin-dependent protein kinase activating kinase activity	1336	384	326	44	3.3	0.440336	0.483963	-0.0436273	no
GO:0004705	JUN kinase activity	1336	384	326	44	3.3	0.440336	0.483963	-0.0436273	no
GO:0008545	JUN kinase kinase activity	1336	384	326	44	3.3	0.440336	0.483963	-0.0436273	no
GO:0004704	NF-kappaB-inducing kinase activity	1336	384	326	44	3.3	0.440336	0.483963	-0.0436273	no
GO:0004696		1336	384	326	44	3.3	0.440336	0.483963	-0.0436273	no
GO:0004679	AMP-activated protein kinase activity	1336	384	326	44	3.3	0.440336	0.483963	-0.0436273	no
GO:0019199	transmembrane receptor protein kinase activity	1336	384	326	44	3.3	0.440336	0.483963	-0.0436273	no
GO:0004702	receptor signaling protein serine/threonine kinase activity	1336	384	326	44	3.3	0.440336	0.483963	-0.0436273	no
GO:0004676	3-phosphoinositide-dependent protein kinase activity	1336	384	326	44	3.3	0.440336	0.483963	-0.0436273	no
GO:0016909	SAP kinase activity	1336	384	326	44	3.3	0.440336	0.483963	-0.0436273	no
GO:0004710		1336	384	326	44	3.3	0.440336	0.483963	-0.0436273	no
GO:0004690	cyclic nucleotide-dependent protein kinase activity	1336	384	326	44	3.3	0.440336	0.483963	-0.0436273	no
GO:0034211	GTP-dependent protein kinase activity	1336	384	326	44	3.3	0.440336	0.483963	-0.0436273	no
GO:0004711	ribosomal protein S6 kinase activity	1336	384	326	44	3.3	0.440336	0.483963	-0.0436273	no
GO:0004706	JUN kinase kinase kinase activity	1336	384	326	44	3.3	0.440336	0.483963	-0.0436273	no
GO:0004700		1336	384	326	44	3.3	0.440336	0.483963	-0.0436273	no
GO:0016908		1336	384	326	44	3.3	0.440336	0.483963	-0.0436273	no
GO:0004695		1336	384	326	44	3.3	0.440336	0.483963	-0.0436273	no
GO:0008338		1336	384	326	44	3.3	0.440336	0.483963	-0.0436273	no
GO:0004708	MAP kinase kinase activity	1336	384	326	44	3.3	0.440336	0.483963	-0.0436273	no
GO:0004718		1336	384	326	44	3.3	0.440336	0.483963	-0.0436273	no
GO:0000981	RNA polymerase II transcription factor activity, sequence-specific DNA binding	1279	855	355	6	0.5	0.276481	0.300456	-0.0239756	no
GO:0008237	metallopeptidase activity	1252	419	341	232	18.5	0.571921	0.551982	0.0199388	no
GO:0004190	aspartic-type endopeptidase activity	1224	504	312	452	36.9	0.541177	0.567231	-0.0260542	no
GO:0006351	transcription, DNA-templated	1213	769	360	10	0.8	0.369719	0.444789	-0.0750698	no
GO:0016705	oxidoreductase activity, acting on paired donors, with incorporation or reduction of molecular oxygen	1190	593	551	98	8.2	0.409855	0.507574	-0.0977185	no
GO:0000287	magnesium ion binding	1182	384	362	33	2.8	0.639302	0.565876	0.0734264	no
GO:0051287	NAD binding	1173	418	306	18	1.5	0.678911	0.630797	0.0481141	no
GO:0003887	DNA-directed DNA polymerase activity	1165	325	295	15	1.3	0.464775	0.504776	-0.0400009	no
GO:0004308	exo-alpha-sialidase activity	1162	244	271	129	11.1	0.481242	0.528635	-0.0473929	no
GO:0006396	RNA processing	1129	370	329	20	1.8	0.529181	0.533173	-0.00399217	no
GO:0006260	DNA replication	1118	377	328	6	0.5	0.506607	0.512756	-0.00614867	no
GO:0016810	hydrolase activity, acting on carbon-nitrogen (but not peptide) bonds	1107	395	285	252	22.8	0.55878	0.566561	-0.00778166	no
GO:0016616	oxidoreductase activity, acting on the CH-OH group of donors, NAD or NADP as acceptor	1106	426	260	27	2.4	0.702319	0.618988	0.0833308	no
GO:0045449		1104	343	247	21	1.9	0.427359	0.494275	-0.0669167	no
GO:0006464	cellular protein modification process	1095	311	284	34	3.1	0.557035	0.51712	0.0399157	no
GO:0003755	peptidyl-prolyl cis-trans isomerase activity	1059	329	274	76	7.2	0.682112	0.624854	0.0572584	no
GO:0048037	cofactor binding	1048	346	191	26	2.5	0.53074	0.534738	-0.00399834	no
GO:0016740	transferase activity	1008	343	284	33	3.3	0.618659	0.535377	0.0832821	no
GO:0016614	oxidoreductase activity, acting on CH-OH group of donors	993	373	325	406	40.9	0.592019	0.604609	-0.0125905	no
GO:0005507	copper ion binding	982	332	246	295	30	0.540949	0.563447	-0.0224984	no
GO:0031072	heat shock protein binding	978	274	231	113	11.6	0.621029	0.568372	0.0526569	no
GO:0004871	signal transducer activity	978	295	258	18	1.8	0.467075	0.511973	-0.0448983	no
GO:0015171	amino acid transmembrane transporter activity	973	391	267	14	1.4	0.505997	0.504779	0.00121842	no
GO:0051438	regulation of ubiquitin-protein transferase activity	969	255	237	18	1.9	0.554086	0.491941	0.0621453	no
GO:0051444	negative regulation of ubiquitin-protein transferase activity	969	255	237	18	1.9	0.554086	0.491941	0.0621453	no
GO:0051443	positive regulation of ubiquitin-protein transferase activity	969	255	237	18	1.9	0.554086	0.491941	0.0621453	no
GO:0051440	regulation of ubiquitin-protein ligase activity involved in meiotic cell cycle	969	255	237	18	1.9	0.554086	0.491941	0.0621453	no
GO:0006812	cation transport	966	348	241	28	2.9	0.569997	0.50066	0.0693374	no
GO:0008415		950	274	221	25	2.6	0.570088	0.479982	0.0901057	no
GO:0010181	FMN binding	939	354	272	32	3.4	0.671418	0.573518	0.0978997	no
GO:0034061	DNA polymerase activity	905	238	219	10	1.1	0.459718	0.489626	-0.0299071	no
GO:0050662	coenzyme binding	879	334	175	23	2.6	0.608009	0.571109	0.0369004	no
GO:0016307	phosphatidylinositol phosphate kinase activity	840	250	185	22	2.6	0.46852	0.479843	-0.0113232	no
GO:0004402	histone acetyltransferase activity	836	197	170	38	4.5	0.454863	0.522871	-0.0680076	no
GO:0044237	cellular metabolic process	836	244	180	22	2.6	0.592463	0.522567	0.0698964	no
GO:0031177	phosphopantetheine binding	827	274	183	49	5.9	0.514828	0.495142	0.0196864	no
GO:0006865	amino acid transport	827	298	195	14	1.7	0.558198	0.522513	0.0356852	no
GO:0016788	hydrolase activity, acting on ester bonds	825	337	191	303	36.7	0.513255	0.529105	-0.0158495	no
GO:0008236	serine-type peptidase activity	816	279	217	314	38.5	0.556857	0.541419	0.0154373	no
GO:0006725	cellular aromatic compound metabolic process	816	243	162	84	10.3	0.576794	0.571463	0.00533128	no
GO:0006461	protein complex assembly	789	234	177	15	1.9	0.595389	0.534	0.0613889	no
GO:0004222	metalloendopeptidase activity	779	306	223	154	19.8	0.630644	0.589695	0.0409487	no
GO:0016538	cyclin-dependent protein serine/threonine kinase regulator activity	778	225	176	21	2.7	0.479067	0.480239	-0.00117197	no
GO:0003964	RNA-directed DNA polymerase activity	762	586	20	9	1.2	0.407259	0.3614	0.0458594	no
GO:0016791	phosphatase activity	760	229	233	31	4.1	0.501511	0.487635	0.0138757	no
GO:0050381		750	165	150	137	18.3	0.471624	0.412427	0.0591976	no
GO:0004518	nuclease activity	741	213	187	24	3.2	0.47493	0.497995	-0.0230651	no
GO:0008607	phosphorylase kinase regulator activity	737	209	159	21	2.8	0.479158	0.476679	0.00247865	no
GO:0006278	RNA-dependent DNA replication	733	566	15	9	1.2	0.407594	0.3782	0.0293936	no
GO:0006807	nitrogen compound metabolic process	731	265	184	13	1.8	0.596615	0.571739	0.024876	no
GO:0051734	ATP-dependent polynucleotide kinase activity	730	209	159	21	2.9	0.479158	0.476679	0.00247865	no
GO:0051735	GTP-dependent polynucleotide kinase activity	730	209	159	21	2.9	0.479158	0.476679	0.00247865	no
GO:0051731	polynucleotide 5'-hydroxyl-kinase activity	730	209	159	21	2.9	0.479158	0.476679	0.00247865	no
GO:0019914	cyclin-dependent protein kinase activating kinase regulator activity	729	209	159	21	2.9	0.479158	0.476679	0.00247865	no
GO:0035004	phosphatidylinositol 3-kinase activity	729	209	159	21	2.9	0.479158	0.476679	0.00247865	no
GO:0043798	glycerate 2-kinase activity	729	209	159	21	2.9	0.479158	0.476679	0.00247865	no
GO:0032942	inositol tetrakisphosphate 2-kinase activity	729	209	159	21	2.9	0.479158	0.476679	0.00247865	no
GO:0043771	cytidine kinase activity	729	209	159	21	2.9	0.479158	0.476679	0.00247865	no
GO:0043743	LPPG:FO 2-phospho-L-lactate transferase activity	729	209	159	21	2.9	0.479158	0.476679	0.00247865	no
GO:0008443	phosphofructokinase activity	729	209	159	21	2.9	0.479158	0.476679	0.00247865	no
GO:0008819	cobinamide kinase activity	729	209	159	21	2.9	0.479158	0.476679	0.00247865	no
GO:0042557	eukaryotic elongation factor-2 kinase activator activity	729	209	159	21	2.9	0.479158	0.476679	0.00247865	no
GO:0043841	(S)-lactate 2-kinase activity	729	209	159	21	2.9	0.479158	0.476679	0.00247865	no
GO:0042556	eukaryotic elongation factor-2 kinase regulator activity	729	209	159	21	2.9	0.479158	0.476679	0.00247865	no
GO:0018720	phenol kinase activity	729	209	159	21	2.9	0.479158	0.476679	0.00247865	no
GO:0004601	peroxidase activity	724	189	247	229	31.6	0.62627	0.567377	0.0588933	no
GO:0008171	O-methyltransferase activity	720	216	162	17	2.4	0.596611	0.518728	0.0778827	no
GO:0004721	phosphoprotein phosphatase activity	716	212	166	17	2.4	0.588632	0.508645	0.0799875	no
GO:0030001	metal ion transport	709	276	172	73	10.3	0.537786	0.487017	0.0507688	no
GO:0022857	transmembrane transporter activity	709	471	209	14	2	0.552985	0.56656	-0.0135747	no
GO:0004725	protein tyrosine phosphatase activity	706	203	197	8	1.1	0.475842	0.472228	0.00361394	no
GO:0003779	actin binding	700	252	185	18	2.6	0.618163	0.563097	0.0550654	no
GO:0007018	microtubule-based movement	683	249	193	11	1.6	0.628036	0.549596	0.0784403	no
GO:0007186	G-protein coupled receptor signaling pathway	677	197	171	42	6.2	0.476782	0.458088	0.018694	no
GO:0004724	magnesium-dependent protein serine/threonine phosphatase activity	673	195	148	17	2.5	0.596179	0.510547	0.0856322	no
GO:0008420	CTD phosphatase activity	669	193	146	17	2.5	0.595948	0.507226	0.0887222	no
GO:0005963	magnesium-dependent protein serine/threonine phosphatase complex	669	193	146	17	2.5	0.595948	0.507226	0.0887222	no
GO:0008597	calcium-dependent protein serine/threonine phosphatase regulator activity	669	193	146	17	2.5	0.595948	0.507226	0.0887222	no
GO:0004723	calcium-dependent protein serine/threonine phosphatase activity	669	193	146	17	2.5	0.595948	0.507226	0.0887222	no
GO:0017023	myosin phosphatase complex	669	193	146	17	2.5	0.595948	0.507226	0.0887222	no
GO:0017020	myosin phosphatase regulator activity	669	193	146	17	2.5	0.595948	0.507226	0.0887222	no
GO:0017018	myosin phosphatase activity	669	193	146	17	2.5	0.595948	0.507226	0.0887222	no
GO:0003777	microtubule motor activity	662	232	169	12	1.8	0.557953	0.546533	0.01142	no
GO:0016758	transferase activity, transferring hexosyl groups	656	260	180	30	4.6	0.451019	0.477183	-0.0261641	no
GO:0006470	protein dephosphorylation	655	207	197	10	1.5	0.503014	0.493909	0.00910586	no
GO:0015078	hydrogen ion transmembrane transporter activity	643	199	188	21	3.3	0.635623	0.57333	0.0622933	no
GO:0019787	ubiquitin-like protein transferase activity	635	169	149	12	1.9	0.514828	0.432584	0.0822445	no
GO:0051246	regulation of protein metabolic process	635	169	149	12	1.9	0.514828	0.432584	0.0822445	no
GO:0043687	post-translational protein modification	635	169	149	12	1.9	0.514828	0.432584	0.0822445	no
GO:0050661	NADP binding	629	243	184	20	3.2	0.547403	0.56012	-0.0127163	no
GO:0008033	tRNA processing	626	211	186	10	1.6	0.507175	0.469952	0.0372237	no
GO:0016820	hydrolase activity, acting on acid anhydrides, catalyzing transmembrane movement of substances	618	195	125	15	2.4	0.684169	0.59304	0.0911292	no
GO:0003682	chromatin binding	616	341	108	3	0.5	0.554147	0.507981	0.0461651	no
GO:0046677	response to antibiotic	612	198	111	64	10.5	0.466348	0.520126	-0.0537776	no
GO:0000785	chromatin	607	327	91	4	0.7	0.567725	0.505626	0.0620984	no
GO:0016310	phosphorylation	607	214	154	8	1.3	0.490925	0.503734	-0.0128085	no
GO:0007242		606	187	125	34	5.6	0.450615	0.476616	-0.026001	no
GO:0035091	phosphatidylinositol binding	604	210	166	14	2.3	0.490381	0.51659	-0.0262094	no
GO:0030117	membrane coat	597	206	156	3	0.5	0.608286	0.542212	0.0660749	no
GO:0030246	carbohydrate binding	593	197	157	278	46.9	0.618579	0.592726	0.0258526	no
GO:0000030		592	183	150	88	14.9	0.485891	0.441627	0.044264	no
GO:0004252	serine-type endopeptidase activity	592	271	163	191	32.3	0.614185	0.55311	0.0610741	no
GO:0006333	chromatin assembly or disassembly	590	320	91	4	0.7	0.573066	0.491516	0.0815491	no
GO:0016772	transferase activity, transferring phosphorus-containing groups	582	204	159	8	1.4	0.481431	0.494025	-0.0125938	no
GO:0006139	nucleobase-containing compound metabolic process	573	161	166	8	1.4	0.494733	0.518602	-0.0238695	no
GO:0046873	metal ion transmembrane transporter activity	545	209	133	68	12.5	0.520833	0.44503	0.0758025	no
GO:0000155		542	222	139	8	1.5	0.418937	0.509367	-0.09043	no
GO:0016779	nucleotidyltransferase activity	530	176	143	10	1.9	0.610557	0.53065	0.0799065	no
GO:0016311	dephosphorylation	530	144	161	11	2.1	0.424715	0.435	-0.0102847	no
GO:0016874	ligase activity	525	182	126	8	1.5	0.514874	0.504563	0.0103101	no
GO:0016773	phosphotransferase activity, alcohol group as acceptor	509	175	154	10	2	0.533589	0.510247	0.0233418	no
GO:0016301	kinase activity	504	186	135	6	1.2	0.54129	0.513474	0.0278162	no
GO:0006950	response to stress	490	221	98	20	4.1	0.51705	0.573459	-0.0564094	no
GO:0008324	cation transmembrane transporter activity	482	168	121	22	4.6	0.487667	0.461876	0.0257906	no
GO:0005694	chromosome	475	139	131	8	1.7	0.646453	0.630412	0.016041	no
GO:0006259	DNA metabolic process	475	133	129	5	1.1	0.558917	0.588868	-0.0299509	no
GO:0016829	lyase activity	470	206	107	26	5.5	0.624908	0.593561	0.031347	no
GO:0018600	alpha-pinene dehydrogenase activity	468	124	92	57	12.2	0.524484	0.435859	0.0886252	no
GO:0018589	di-n-butyltin dioxygenase activity	468	124	92	57	12.2	0.524484	0.435859	0.0886252	no
GO:0018599	2-hydroxyisobutyrate 3-monooxygenase activity	468	124	92	57	12.2	0.524484	0.435859	0.0886252	no
GO:0018594	tert-butanol 2-monooxygenase activity	468	124	92	57	12.2	0.524484	0.435859	0.0886252	no
GO:0018593	4-chlorophenoxyacetate monooxygenase activity	468	124	92	57	12.2	0.524484	0.435859	0.0886252	no
GO:0043823	spheroidene monooxygenase activity	468	124	92	57	12.2	0.524484	0.435859	0.0886252	no
GO:0018597	ammonia monooxygenase activity	468	124	92	57	12.2	0.524484	0.435859	0.0886252	no
GO:0018598	hydroxymethylsilanetriol oxidase activity	468	124	92	57	12.2	0.524484	0.435859	0.0886252	no
GO:0018588	tri-n-butyltin dioxygenase activity	468	124	92	57	12.2	0.524484	0.435859	0.0886252	no
GO:0018596	dimethylsilanediol hydroxylase activity	468	124	92	57	12.2	0.524484	0.435859	0.0886252	no
GO:0018586	mono-butyltin dioxygenase activity	468	124	92	57	12.2	0.524484	0.435859	0.0886252	no
GO:0018592	4-nitrocatechol 4-monooxygenase activity	468	124	92	57	12.2	0.524484	0.435859	0.0886252	no
GO:0018585	fluorene oxygenase activity	468	124	92	57	12.2	0.524484	0.435859	0.0886252	no
GO:0018590	methylsilanetriol hydroxylase activity	468	124	92	57	12.2	0.524484	0.435859	0.0886252	no
GO:0018595	alpha-pinene monooxygenase activity	468	124	92	57	12.2	0.524484	0.435859	0.0886252	no
GO:0018591	methyl tertiary butyl ether 3-monooxygenase activity	468	124	92	57	12.2	0.524484	0.435859	0.0886252	no
GO:0016884	carbon-nitrogen ligase activity, with glutamine as amido-N-donor	465	165	105	40	8.6	0.437927	0.504895	-0.066968	no
GO:0007154	cell communication	461	131	106	30	6.5	0.484847	0.548236	-0.0633885	no
GO:0004197	cysteine-type endopeptidase activity	457	133	101	45	9.8	0.495015	0.504881	-0.00986615	no
GO:0004316	3-oxoacyl-[acyl-carrier-protein] reductase (NADPH) activity	455	115	120	8	1.8	0.619191	0.536717	0.0824746	no
GO:0006808	regulation of nitrogen utilization	451	125	61	12	2.7	0.628712	0.572361	0.0563513	no
GO:0006289	nucleotide-excision repair	436	153	130	5	1.1	0.527928	0.558208	-0.0302796	no
GO:0032259	methylation	434	131	127	21	4.8	0.431595	0.466	-0.0344046	no
GO:0004519	endonuclease activity	433	145	104	64	14.8	0.4808	0.531087	-0.0502865	no
GO:0004568	chitinase activity	432	136	123	218	50.5	0.573191	0.558813	0.0143782	no
GO:0003847	1-alkyl-2-acetylglycerophosphocholine esterase activity	431	106	121	22	5.1	0.424368	0.416248	0.00811999	no
GO:0003993	acid phosphatase activity	431	160	96	136	31.6	0.575331	0.561656	0.013675	no
GO:0008173	RNA methyltransferase activity	429	119	98	6	1.4	0.589891	0.502245	0.0876459	no
GO:0004576	oligosaccharyl transferase activity	428	126	95	80	18.7	0.441849	0.402232	0.0396176	no
GO:0006397	mRNA processing	420	152	131	23	5.5	0.58698	0.552069	0.0349116	no
GO:0008425	2-polyprenyl-6-methoxy-1,4-benzoquinone methyltransferase activity	415	108	93	4	1	0.589472	0.490183	0.0992894	no
GO:0019752	carboxylic acid metabolic process	410	142	110	0	0	0.702	0.633055	0.0689455	no
GO:0035023	regulation of Rho protein signal transduction	408	138	119	1	0.2	0.408478	0.472277	-0.063799	no
GO:0005089	Rho guanyl-nucleotide exchange factor activity	408	138	119	1	0.2	0.408478	0.472277	-0.063799	no
GO:0004583	dolichyl-phosphate-glucose-glycolipid alpha-glucosyltransferase activity	399	118	88	76	19	0.382008	0.384875	-0.00286653	no
GO:0003980	UDP-glucose:glycoprotein glucosyltransferase activity	399	117	88	85	21.3	0.408291	0.402898	0.00539287	no
GO:0008233	peptidase activity	398	129	101	128	32.2	0.581333	0.522228	0.0591056	no
GO:0016413	O-acetyltransferase activity	397	112	82	4	1	0.52192	0.434378	0.0875416	no
GO:0008138	protein tyrosine/serine/threonine phosphatase activity	397	108	115	7	1.8	0.429833	0.438696	-0.00886232	no
GO:0006352	DNA-templated transcription, initiation	396	128	115	5	1.3	0.637453	0.558304	0.0791488	no
GO:0008378	galactosyltransferase activity	396	118	84	76	19.2	0.397763	0.393976	0.00378652	no
GO:0008375	acetylglucosaminyltransferase activity	396	117	87	76	19.2	0.398718	0.395046	0.00367197	no
GO:0004022	alcohol dehydrogenase (NAD) activity	396	115	87	3	0.8	0.634626	0.609161	0.0254652	no
GO:0007049	cell cycle	394	135	106	5	1.3	0.622719	0.547113	0.0756053	no
GO:0016407	acetyltransferase activity	393	114	91	3	0.8	0.512333	0.47844	0.0338938	no
GO:0004806	triglyceride lipase activity	393	111	90	110	28	0.391901	0.4746	-0.0826991	no
GO:0042578	phosphoric ester hydrolase activity	391	115	91	19	4.9	0.518843	0.487637	0.0312061	no
GO:0008417	fucosyltransferase activity	391	112	85	76	19.4	0.398366	0.402035	-0.00366922	no
GO:0004024	alcohol dehydrogenase activity, zinc-dependent	391	115	83	3	0.8	0.634626	0.610169	0.0244574	no
GO:0004023	alcohol dehydrogenase activity, metal ion-independent	391	115	83	3	0.8	0.634626	0.610169	0.0244574	no
GO:0004025	alcohol dehydrogenase activity, iron-dependent	391	115	83	3	0.8	0.634626	0.610169	0.0244574	no
GO:0018716	1-phenanthrol glycosyltransferase activity	386	111	83	76	19.7	0.395793	0.397277	-0.00148432	no
GO:0033556	dolichyl pyrophosphate Man7GlcNAc2 alpha-1,3-glucosyltransferase activity	386	111	83	76	19.7	0.395793	0.397277	-0.00148432	no
GO:0031278	alpha-1,2-galactosyltransferase activity	386	111	83	76	19.7	0.395793	0.397277	-0.00148432	no
GO:0019112	phenanthrol glycosyltransferase activity	386	111	83	76	19.7	0.395793	0.397277	-0.00148432	no
GO:0019187	beta-1,4-mannosyltransferase activity	386	111	83	76	19.7	0.395793	0.397277	-0.00148432	no
GO:0000009	alpha-1,6-mannosyltransferase activity	386	111	83	76	19.7	0.395793	0.397277	-0.00148432	no
GO:0018718	1,2-dihydroxy-phenanthrene glycosyltransferase activity	386	111	83	76	19.7	0.395793	0.397277	-0.00148432	no
GO:0042283	dolichyl pyrophosphate Glc1Man9GlcNAc2 alpha-1,3-glucosyltransferase activity	386	111	83	76	19.7	0.395793	0.397277	-0.00148432	no
GO:0008921	lipopolysaccharide-1,6-galactosyltransferase activity	386	111	83	76	19.7	0.395793	0.397277	-0.00148432	no
GO:0042281	dolichyl pyrophosphate Man9GlcNAc2 alpha-1,3-glucosyltransferase activity	386	111	83	76	19.7	0.395793	0.397277	-0.00148432	no
GO:0018717	9-phenanthrol glycosyltransferase activity	386	111	83	76	19.7	0.395793	0.397277	-0.00148432	no
GO:0018715	9-phenanthrol UDP-glucuronosyltransferase activity	386	111	83	76	19.7	0.395793	0.397277	-0.00148432	no
GO:0016759	cellulose synthase activity	386	111	83	76	19.7	0.395793	0.397277	-0.00148432	no
GO:0016253		386	111	83	76	19.7	0.395793	0.397277	-0.00148432	no
GO:0046921	alpha-(1->6)-fucosyltransferase activity	386	111	83	76	19.7	0.395793	0.397277	-0.00148432	no
GO:0004376	glycolipid mannosyltransferase activity	386	111	83	76	19.7	0.395793	0.397277	-0.00148432	no
GO:0045140	inositol phosphoceramide synthase activity	386	111	83	76	19.7	0.395793	0.397277	-0.00148432	no
GO:0046920	alpha-(1->3)-fucosyltransferase activity	386	111	83	76	19.7	0.395793	0.397277	-0.00148432	no
GO:0001962	alpha-1,3-galactosyltransferase activity	386	111	83	76	19.7	0.395793	0.397277	-0.00148432	no
GO:0000033		386	111	83	76	19.7	0.395793	0.397277	-0.00148432	no
GO:0008376	acetylgalactosaminyltransferase activity	386	111	83	76	19.7	0.395793	0.397277	-0.00148432	no
GO:0046527	glucosyltransferase activity	386	111	83	76	19.7	0.395793	0.397277	-0.00148432	no
GO:0008755	O antigen polymerase activity	386	111	83	76	19.7	0.395793	0.397277	-0.00148432	no
GO:0000026		386	111	83	76	19.7	0.395793	0.397277	-0.00148432	no
GO:0003684	damaged DNA binding	385	130	118	3	0.8	0.469623	0.564203	-0.0945803	no
GO:0008234	cysteine-type peptidase activity	382	101	98	48	12.6	0.530752	0.510959	0.0197933	no
GO:0005875	microtubule associated complex	381	115	100	6	1.6	0.547904	0.52698	0.0209243	no
GO:0003960	NADPH:quinone reductase activity	372	100	68	4	1.1	0.64979	0.558382	0.0914076	no
GO:0006298	mismatch repair	367	121	109	5	1.4	0.43805	0.490679	-0.0526293	no
GO:0030983	mismatched DNA binding	360	118	106	5	1.4	0.44361	0.494028	-0.0504181	no
GO:0005789	endoplasmic reticulum membrane	358	130	108	86	24	0.425992	0.380463	0.0455293	no
GO:0003910	DNA ligase (ATP) activity	357	127	84	6	1.7	0.520953	0.549024	-0.0280711	no
GO:0008374	O-acyltransferase activity	357	104	84	3	0.8	0.50624	0.4465	0.0597404	no
GO:0004693	cyclin-dependent protein serine/threonine kinase activity	354	98	79	6	1.7	0.463592	0.441797	0.0217944	no
GO:0004620	phospholipase activity	350	107	101	98	28	0.445131	0.527406	-0.0822751	no
GO:0004673	protein histidine kinase activity	346	116	80	6	1.7	0.411879	0.492225	-0.0803457	no
GO:0018106	peptidyl-histidine phosphorylation	344	116	80	6	1.7	0.411879	0.492225	-0.0803457	no
GO:0015904	tetracycline transport	343	101	66	9	2.6	0.470683	0.487318	-0.016635	no
GO:0015520	tetracycline:proton antiporter activity	343	101	66	9	2.6	0.470683	0.487318	-0.016635	no
GO:0009073	aromatic amino acid family biosynthetic process	343	113	85	9	2.6	0.699168	0.637153	0.0620152	no
GO:0016415	octanoyltransferase activity	330	94	68	3	0.9	0.517415	0.434059	0.0833561	no
GO:0000175		329	88	80	5	1.5	0.456864	0.511312	-0.0544489	no
GO:0006032	chitin catabolic process	326	105	103	164	50.3	0.571152	0.587107	-0.0159544	no
GO:0005085	guanyl-nucleotide exchange factor activity	325	118	90	2	0.6	0.402661	0.439022	-0.0363612	no
GO:0008951	palmitoleoyl [acyl-carrier-protein]-dependent acyltransferase activity	323	91	64	3	0.9	0.525571	0.446828	0.0787433	no
GO:0019107	myristoyltransferase activity	323	91	64	3	0.9	0.525571	0.446828	0.0787433	no
GO:0019186	acyl-CoA N-acyltransferase activity	323	91	64	3	0.9	0.525571	0.446828	0.0787433	no
GO:0016454	C-palmitoyltransferase activity	323	91	64	3	0.9	0.525571	0.446828	0.0787433	no
GO:0032216	glucosaminyl-phosphotidylinositol O-acyltransferase activity	323	91	64	3	0.9	0.525571	0.446828	0.0787433	no
GO:0004147	dihydrolipoamide branched chain acyltransferase activity	323	91	64	3	0.9	0.525571	0.446828	0.0787433	no
GO:0019706	protein-cysteine S-palmitoyltransferase activity	323	91	64	3	0.9	0.525571	0.446828	0.0787433	no
GO:0016751	S-succinyltransferase activity	323	91	64	3	0.9	0.525571	0.446828	0.0787433	no
GO:0004406		323	91	64	3	0.9	0.525571	0.446828	0.0787433	no
GO:0016416	O-palmitoyltransferase activity	323	91	64	3	0.9	0.525571	0.446828	0.0787433	no
GO:0016748	succinyltransferase activity	323	91	64	3	0.9	0.525571	0.446828	0.0787433	no
GO:0019105	N-palmitoyltransferase activity	323	91	64	3	0.9	0.525571	0.446828	0.0787433	no
GO:0018030	peptidyl-lysine N6-myristoyltransferase activity	323	91	64	3	0.9	0.525571	0.446828	0.0787433	no
GO:0018031	peptidyl-lysine N6-palmitoyltransferase activity	323	91	64	3	0.9	0.525571	0.446828	0.0787433	no
GO:0018713	3-ketopimelyl-CoA thiolase activity	323	91	64	3	0.9	0.525571	0.446828	0.0787433	no
GO:0019705	protein-cysteine S-myristoyltransferase activity	323	91	64	3	0.9	0.525571	0.446828	0.0787433	no
GO:0016752	sinapoyltransferase activity	323	91	64	3	0.9	0.525571	0.446828	0.0787433	no
GO:0016414	O-octanoyltransferase activity	323	91	64	3	0.9	0.525571	0.446828	0.0787433	no
GO:0018711	benzoyl acetate-CoA thiolase activity	323	91	64	3	0.9	0.525571	0.446828	0.0787433	no
GO:0043806	keto acid formate lyase activity	323	91	64	3	0.9	0.525571	0.446828	0.0787433	no
GO:0043741	L-2-aminoadipate N-acetyltransferase activity	323	91	64	3	0.9	0.525571	0.446828	0.0787433	no
GO:0016749	N-succinyltransferase activity	323	91	64	3	0.9	0.525571	0.446828	0.0787433	no
GO:0016419	S-malonyltransferase activity	323	91	64	3	0.9	0.525571	0.446828	0.0787433	no
GO:0016408	C-acyltransferase activity	323	91	64	3	0.9	0.525571	0.446828	0.0787433	no
GO:0043764	UDP-3-O-[3-hydroxymyristoyl] glucosamine N-acyltransferase activity	323	91	64	3	0.9	0.525571	0.446828	0.0787433	no
GO:0016750	O-succinyltransferase activity	323	91	64	3	0.9	0.525571	0.446828	0.0787433	no
GO:0016410	N-acyltransferase activity	323	91	64	3	0.9	0.525571	0.446828	0.0787433	no
GO:0016412	serine O-acyltransferase activity	323	91	64	3	0.9	0.525571	0.446828	0.0787433	no
GO:0016753	O-sinapoyltransferase activity	323	91	64	3	0.9	0.525571	0.446828	0.0787433	no
GO:0016417	S-acyltransferase activity	323	91	64	3	0.9	0.525571	0.446828	0.0787433	no
GO:0016418	S-acetyltransferase activity	323	91	64	3	0.9	0.525571	0.446828	0.0787433	no
GO:0016409	palmitoyltransferase activity	323	91	64	3	0.9	0.525571	0.446828	0.0787433	no
GO:0016411	acylglycerol O-acyltransferase activity	323	91	64	3	0.9	0.525571	0.446828	0.0787433	no
GO:0046941	azetidine-2-carboxylic acid acetyltransferase activity	323	91	64	3	0.9	0.525571	0.446828	0.0787433	no
GO:0004405		323	91	64	3	0.9	0.525571	0.446828	0.0787433	no
GO:0019707	protein-cysteine S-acyltransferase activity	323	91	64	3	0.9	0.525571	0.446828	0.0787433	no
GO:0016420	malonyltransferase activity	323	91	64	3	0.9	0.525571	0.446828	0.0787433	no
GO:0043849	Ras palmitoyltransferase activity	323	91	64	3	0.9	0.525571	0.446828	0.0787433	no
GO:0016406	carnitine O-acyltransferase activity	323	91	64	3	0.9	0.525571	0.446828	0.0787433	no
GO:0018712	3-hydroxybutyryl-CoA thiolase activity	323	91	64	3	0.9	0.525571	0.446828	0.0787433	no
GO:0004727	prenylated protein tyrosine phosphatase activity	323	98	69	2	0.6	0.470857	0.527812	-0.0569545	no
GO:0051056	regulation of small GTPase mediated signal transduction	322	102	76	4	1.2	0.402275	0.448816	-0.0465413	no
GO:0015992	proton transport	320	111	82	7	2.2	0.721622	0.665122	0.0564997	no
GO:0004527	exonuclease activity	316	93	80	4	1.3	0.475742	0.492825	-0.0170831	no
GO:0004571	mannosyl-oligosaccharide 1,2-alpha-mannosidase activity	315	114	81	73	23.2	0.473912	0.531235	-0.0573223	no
GO:0005216	ion channel activity	311	95	88	9	2.9	0.456021	0.458159	-0.00213804	no
GO:0004534	5'-3' exoribonuclease activity	308	81	77	5	1.6	0.459012	0.509455	-0.0504422	no
GO:0016831	carboxy-lyase activity	308	123	66	0	0	0.636813	0.622152	0.0146615	no
GO:0004407	histone deacetylase activity	303	84	70	5	1.7	0.512333	0.5432	-0.0308667	no
GO:0006486	protein glycosylation	302	116	84	99	32.8	0.582698	0.511274	0.0714245	no
GO:0051539	4 iron, 4 sulfur cluster binding	302	101	93	8	2.6	0.708772	0.624237	0.0845357	no
GO:0043765	T/G mismatch-specific endonuclease activity	300	75	62	15	5	0.466773	0.476258	-0.00948473	no
GO:0007067	mitotic nuclear division	294	91	88	2	0.7	0.55167	0.576659	-0.0249888	no
GO:0006614	SRP-dependent cotranslational protein targeting to membrane	293	98	80	11	3.8	0.62498	0.547138	0.0778421	no
GO:0003774	motor activity	292	108	69	3	1	0.614407	0.587928	0.0264799	no
GO:0006367	transcription initiation from RNA polymerase II promoter	290	92	89	1	0.3	0.70237	0.626596	0.0757741	no
GO:0022891	substrate-specific transmembrane transporter activity	285	131	154	3	1.1	0.587244	0.576403	0.0108417	no
GO:0008312	7S RNA binding	279	90	75	10	3.6	0.621333	0.543853	0.07748	no
GO:0006888	ER to Golgi vesicle-mediated transport	275	95	73	4	1.5	0.499484	0.497562	0.00192257	no
GO:0018658	salicylate 1-monooxygenase activity	271	75	51	17	6.3	0.4918	0.564157	-0.0723569	no
GO:0008061	chitin binding	270	116	32	172	63.7	0.567595	0.597625	-0.0300302	no
GO:0006284	base-excision repair	269	91	77	11	4.1	0.401198	0.476273	-0.0750749	no
GO:0004091		267	54	58	146	54.7	0.565111	0.466724	0.098387	no
GO:0000105		267	94	73	2	0.7	0.649553	0.597699	0.0518546	no
GO:0004650	polygalacturonase activity	266	137	48	209	78.6	0.719263	0.621313	0.0979503	no
GO:0016747	transferase activity, transferring acyl groups other than amino-acyl groups	266	134	89	4	1.5	0.491784	0.550292	-0.0585086	no
GO:0032040	small-subunit processome	263	94	72	2	0.8	0.654798	0.601458	0.0533395	no
GO:0006506	GPI anchor biosynthetic process	259	100	82	19	7.3	0.29009	0.256268	0.0338217	no
GO:0043169	cation binding	257	84	75	82	31.9	0.612393	0.55768	0.0547129	no
GO:0016620	oxidoreductase activity, acting on the aldehyde or oxo group of donors, NAD or NADP as acceptor	257	99	102	2	0.8	0.758556	0.673225	0.0853301	no
GO:0006904	vesicle docking involved in exocytosis	256	88	72	1	0.4	0.45658	0.451056	0.00552399	no
GO:0004100	chitin synthase activity	256	93	64	5	2	0.59229	0.534906	0.0573841	no
GO:0004525	ribonuclease III activity	255	78	74	11	4.3	0.445487	0.482716	-0.037229	no
GO:0019001	guanyl nucleotide binding	255	66	73	1	0.4	0.558424	0.525301	0.0331229	no
GO:0016070	RNA metabolic process	253	67	61	7	2.8	0.593134	0.54041	0.0527245	no
GO:0005096	GTPase activator activity	252	102	71	4	1.6	0.461951	0.499817	-0.0378659	no
GO:0006357	regulation of transcription from RNA polymerase II promoter	252	115	92	1	0.4	0.545661	0.551815	-0.00615435	no
GO:0030131	clathrin adaptor complex	251	84	71	3	1.2	0.532393	0.520183	0.0122098	no
GO:0006796	phosphate-containing compound metabolic process	251	74	55	21	8.4	0.565608	0.566709	-0.00110098	no
GO:0004427	inorganic diphosphatase activity	251	74	55	21	8.4	0.565608	0.566709	-0.00110098	no
GO:0000398	mRNA splicing, via spliceosome	243	92	98	3	1.2	0.694946	0.628837	0.0661089	no
GO:0001522	pseudouridine synthesis	242	90	78	3	1.2	0.658211	0.594077	0.0641342	no
GO:0005388	calcium-transporting ATPase activity	241	83	51	6	2.5	0.725506	0.629294	0.0962119	no
GO:0015299	solute:proton antiporter activity	240	89	64	15	6.3	0.488573	0.464766	0.0238074	no
GO:0016272	prefoldin complex	239	80	63	1	0.4	0.617313	0.549127	0.0681855	no
GO:0005777	peroxisome	239	84	61	2	0.8	0.558405	0.491361	0.0670441	no
GO:0016459	myosin complex	234	89	57	1	0.4	0.664326	0.614579	0.0497469	no
GO:0008318	protein prenyltransferase activity	232	75	59	9	3.9	0.34808	0.380678	-0.032598	no
GO:0016207	4-coumarate-CoA ligase activity	230	60	56	1	0.4	0.544183	0.524786	0.0193976	no
GO:0016780	phosphotransferase activity, for other substituted phosphate groups	229	73	67	6	2.6	0.487836	0.390328	0.0975073	no
GO:0006265	DNA topological change	227	64	65	4	1.8	0.630891	0.620062	0.0108291	no
GO:0004300	enoyl-CoA hydratase activity	226	67	51	2	0.9	0.621209	0.54798	0.0732286	no
GO:0048500	signal recognition particle	225	71	62	5	2.2	0.658887	0.561806	0.0970809	no
GO:0030145	manganese ion binding	225	90	56	19	8.4	0.636889	0.564554	0.0723353	no
GO:0008017	microtubule binding	224	105	86	2	0.9	0.652962	0.564651	0.0883107	no
GO:0004177	aminopeptidase activity	220	74	67	10	4.5	0.66673	0.609642	0.0570879	no
GO:0009231	riboflavin biosynthetic process	220	79	62	3	1.4	0.544582	0.532065	0.0125178	no
GO:0019538	protein metabolic process	219	68	46	16	7.3	0.611485	0.546935	0.0645505	no
GO:0000293	ferric-chelate reductase activity	218	68	49	28	12.8	0.407779	0.460163	-0.0523839	no
GO:0004616	phosphogluconate dehydrogenase (decarboxylating) activity	217	84	59	2	0.9	0.64125	0.583254	0.0579958	no
GO:0016998	cell wall macromolecule catabolic process	217	75	31	113	52.1	0.567987	0.561871	0.0061157	no
GO:0016567	protein ubiquitination	215	90	62	2	0.9	0.501167	0.550419	-0.0492527	no
GO:0008131	primary amine oxidase activity	214	81	33	20	9.3	0.619346	0.532455	0.0868911	no
GO:0000226	microtubule cytoskeleton organization	214	91	50	4	1.9	0.361956	0.393	-0.031044	no
GO:0016765	transferase activity, transferring alkyl or aryl (other than methyl) groups	210	65	81	10	4.8	0.445862	0.464185	-0.0183236	no
GO:0004043	L-aminoadipate-semialdehyde dehydrogenase activity	209	76	38	2	1	0.481921	0.462184	0.0197368	no
GO:0008759	UDP-3-O-[3-hydroxymyristoyl] N-acetylglucosamine deacetylase activity	209	60	42	5	2.4	0.4435	0.524952	-0.0814524	no
GO:0008418	protein-N-terminal asparagine amidohydrolase activity	209	60	42	5	2.4	0.4435	0.524952	-0.0814524	no
GO:0018749	(3,5-dichlorophenylurea)acetate amidohydrolase activity	209	60	42	5	2.4	0.4435	0.524952	-0.0814524	no
GO:0043748	O-succinylbenzoate synthase activity	209	60	42	5	2.4	0.4435	0.524952	-0.0814524	no
GO:0047419	N-acetylgalactosamine-6-phosphate deacetylase activity	209	60	42	5	2.4	0.4435	0.524952	-0.0814524	no
GO:0043864	indoleacetamide hydrolase activity	209	60	42	5	2.4	0.4435	0.524952	-0.0814524	no
GO:0043747	N2-acetyl-L-lysine deacetylase activity	209	60	42	5	2.4	0.4435	0.524952	-0.0814524	no
GO:0018748	iprodione amidohydrolase activity	209	60	42	5	2.4	0.4435	0.524952	-0.0814524	no
GO:0019239	deaminase activity	208	74	48	6	2.9	0.545973	0.504437	0.0415355	no
GO:0009405	pathogenesis	207	118	62	90	43.5	0.54072	0.451581	0.0891397	no
GO:0008641	small protein activating enzyme activity	206	77	66	1	0.5	0.602221	0.555833	0.0463874	no
GO:0030151	molybdenum ion binding	206	78	46	5	2.4	0.440654	0.503543	-0.0628896	no
GO:0005681	spliceosomal complex	205	69	66	1	0.5	0.701217	0.615909	0.0853083	no
GO:0018110	histone arginine kinase activity	205	73	45	4	2	0.456055	0.519933	-0.0638785	no
GO:0016746	transferase activity, transferring acyl groups	205	105	74	2	1	0.512133	0.454095	0.0580387	no
GO:0005529		203	55	50	18	8.9	0.5426	0.51182	0.03078	no
GO:0016702	oxidoreductase activity, acting on single donors with incorporation of molecular oxygen, incorporation of two atoms of oxygen	202	79	53	62	30.7	0.627595	0.630075	-0.00248054	no
GO:0016818	hydrolase activity, acting on acid anhydrides, in phosphorus-containing anhydrides	201	61	58	1	0.5	0.58359	0.572517	0.0110729	no
GO:0004535	poly(A)-specific ribonuclease activity	201	63	48	4	2	0.53381	0.493167	0.0406429	no
GO:0006811	ion transport	201	65	61	3	1.5	0.501246	0.484934	0.0163117	no
GO:0016757	transferase activity, transferring glycosyl groups	201	100	78	31	15.4	0.40536	0.415705	-0.0103451	no
GO:0031625	ubiquitin protein ligase binding	200	64	58	7	3.5	0.518016	0.543914	-0.0258982	no
