# Supplementary material for: Codon optimization underpins generalist parasitism in fungi
Source: eLife journal article supplement (doi:10.7554/elife.22472), 2017-02-03
Supplement: supp [file elife_poa_e22472_Figure_4_Supplement_1.docx]

**
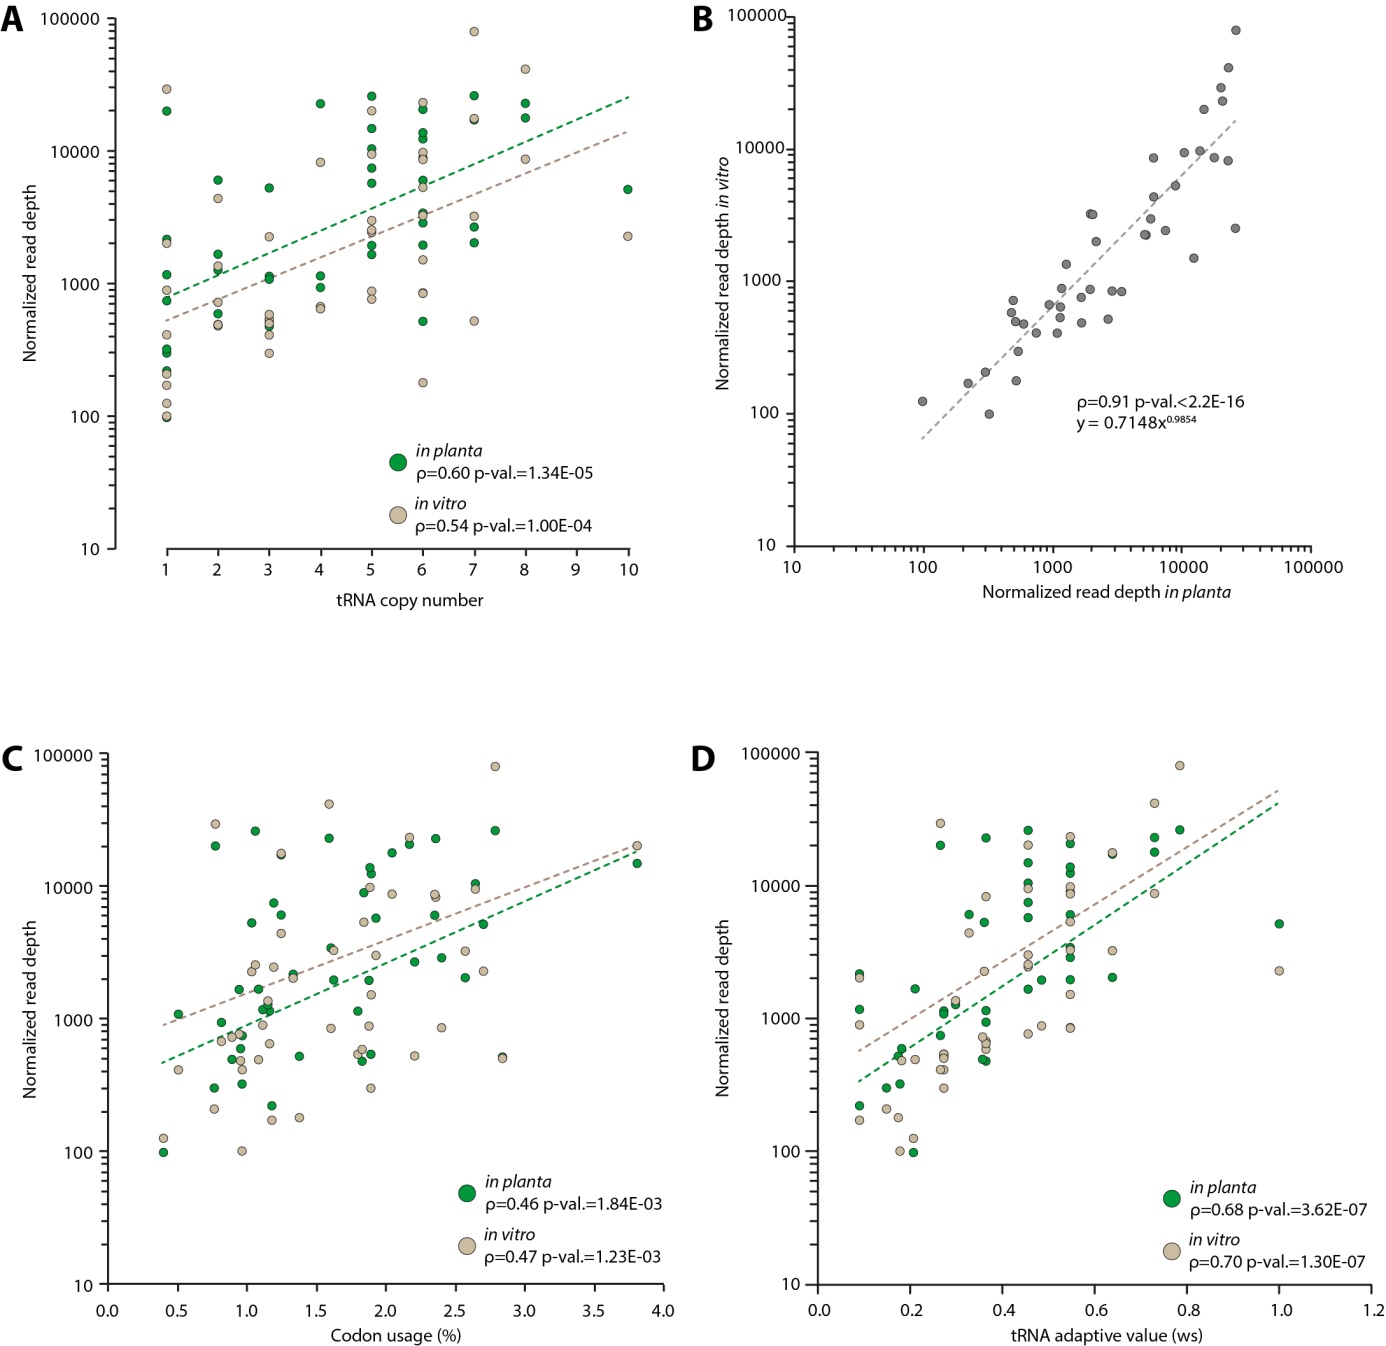
**

**Figure 4 – figure supplement 1. Experimental determination of *S. sclerotiorum* tRNA accumulation supports a good correlation between genomic copy numbers and tRNA accumulation.** The accumulation of tRNA transcripts was determined by sequencing small RNAs of *S. sclerotiorum* grown *in vitro* and *in planta*. **(A)** Normalized read depth correlated exponentially with tRNA copy number for each tRNA species both *in vitro* and *in planta*. **(B)** A comparison of tRNA transcripts accumulation in vitro and in planta. Correlation of tRNA transcripts accumulation with codon usage **(C)** and tRNA adaptive value **(D)** calculated as described in Dos Reis et al. 2004. The exponential regression of the data is shown as a dotted line. The Spearman rank correlation coefficient ρand the p-value for Spearman’s test are given.
